# Supplementary material for: Chromosome-wide profiling of X-chromosome inactivation and epigenetic states in fetal brain and placenta of the opossum, Monodelphis domestica
Source: HighWire-hosted journal article supplement (doi:10.1101/gr.161919.113), 2013-09-24

## Supplemental Figures S1–S51

### Figure S1. Opossum embryonic day 13 fetus dissection.

(A) Opossum embryonic day 13 (E13) fetus surrounded by EEM (translucent membrane).

(B) E13 fetus with EEM peeled back and contracted at umbilical attachment (arrow); this is the tissue used for the EEM analysis. Solid white line is the approximate incision line used to isolate fetal brain.

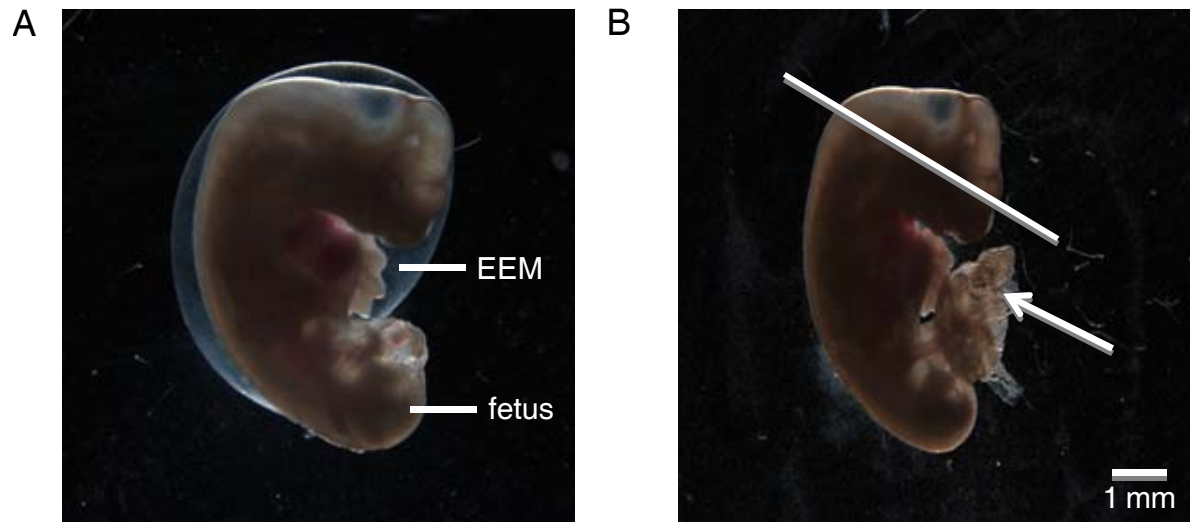

**Figure S2. The scheme for the opossum crosses and tissue dissection.**

(A-B) Reciprocal F1 crosses between LL1 and LL2 animals. (C-D) Parental crosses of LL1 and LL2 animals. In the four crosses, three LL1 animals and three LL2 animals were used. LL1 individuals: A0579 (female) and A0580 (female) are full sibs; LL2 individuals: A0571 (female), A0572 (female) and A0573 (male) are full sibs. A (C/T) SNP was shown (LL1: T and LL2: C).

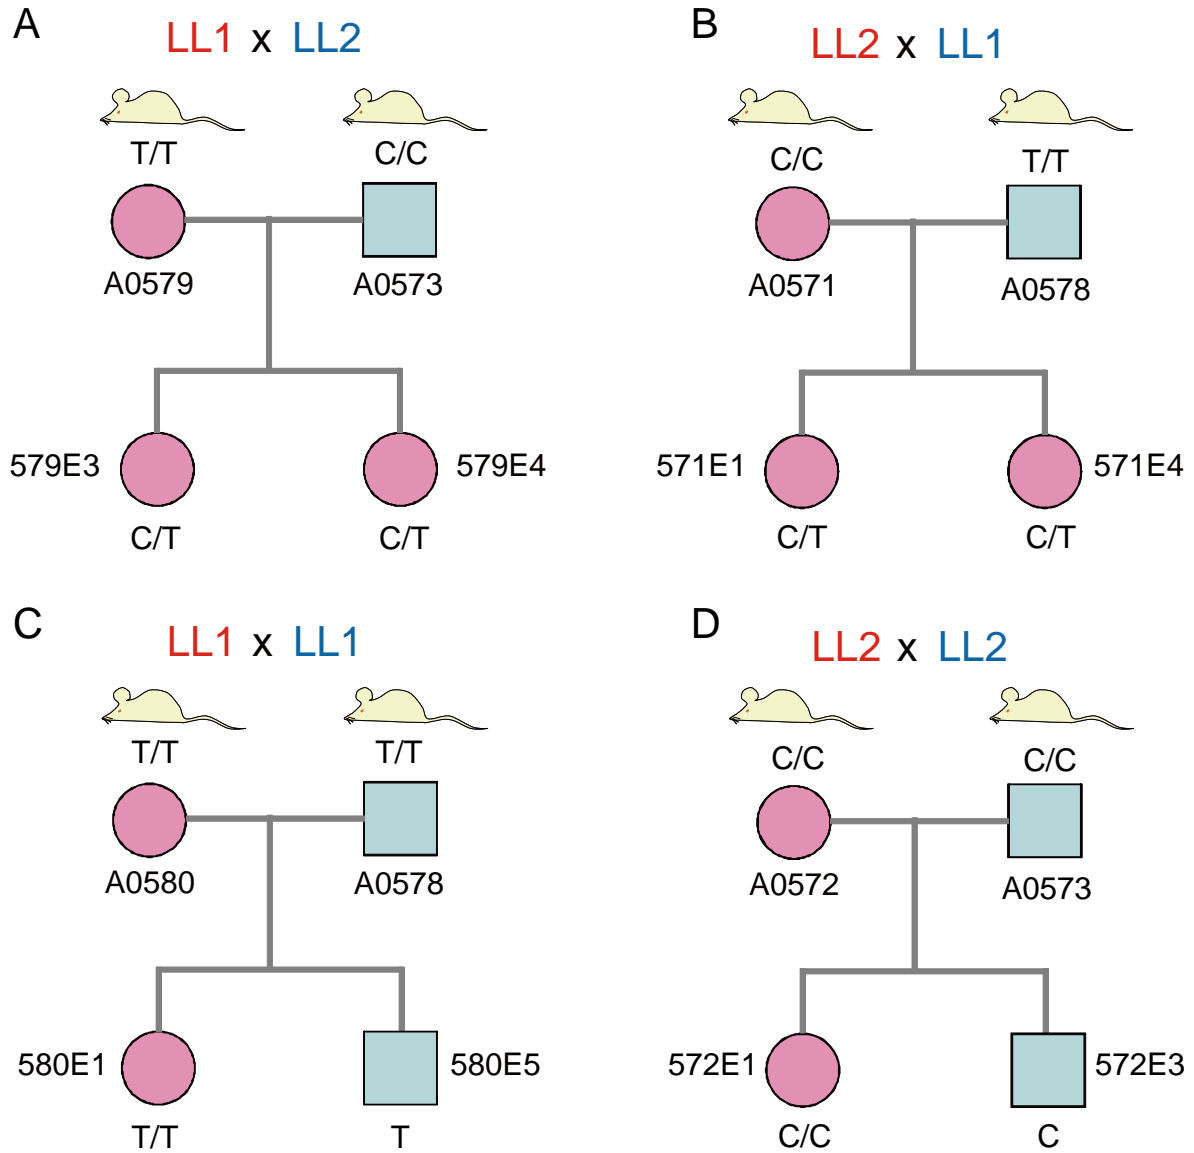

**Figure S3. Sex genotyping results for opossum embryos.**

The samples selected for Illumina RNA-seq are labeled with an asterisk.

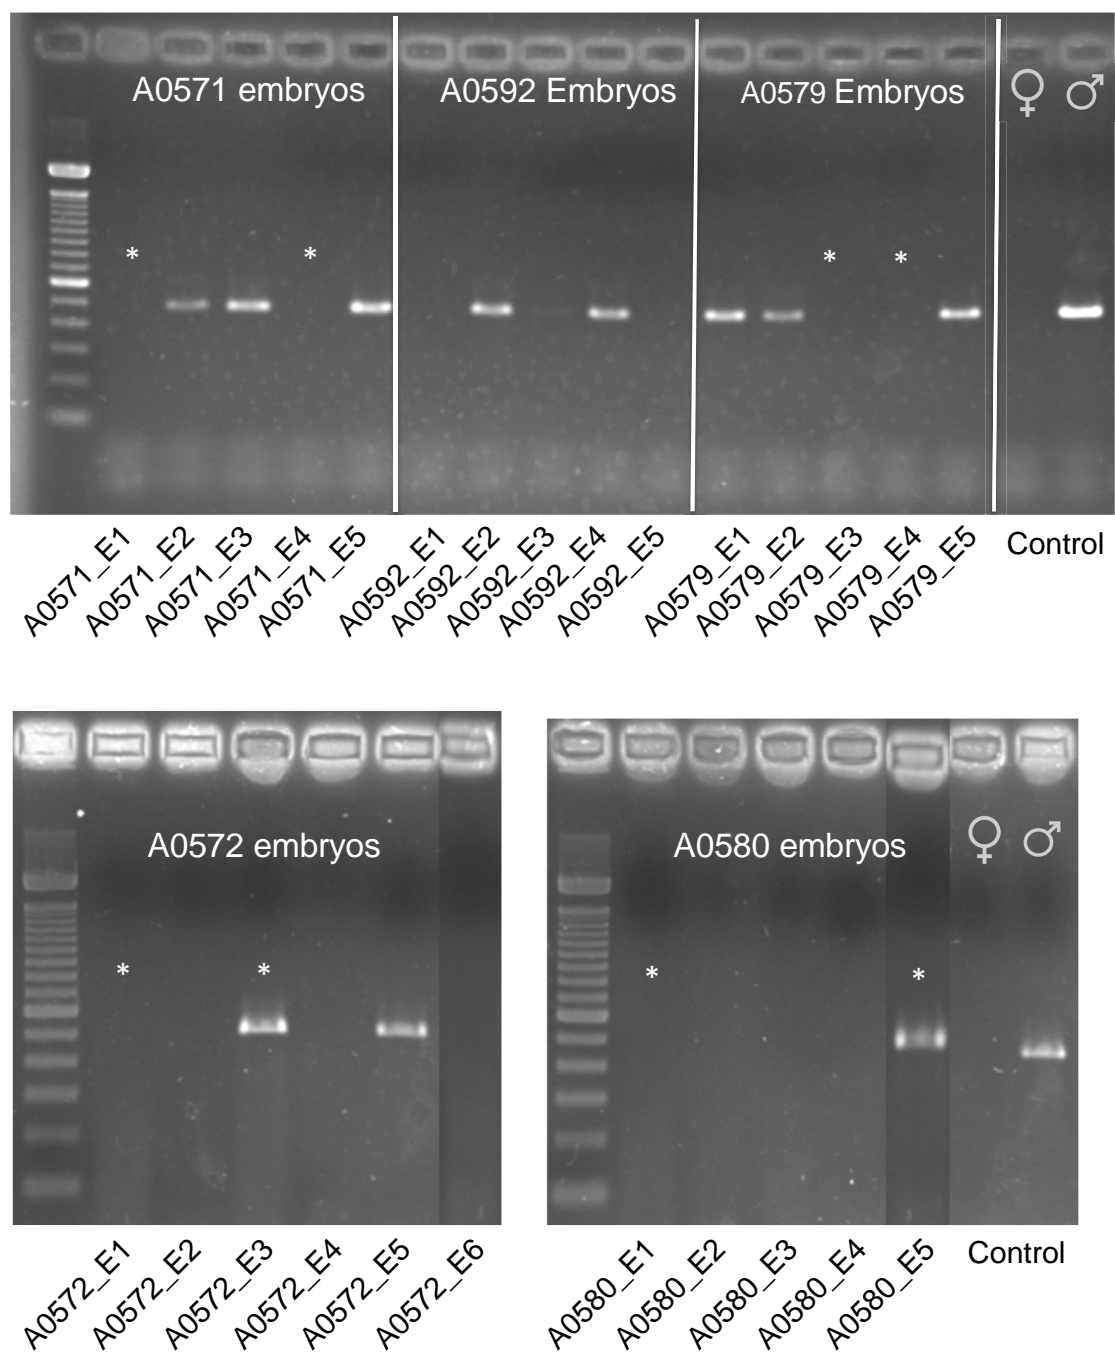

**Figure S4. RNA-seq, SNP genotyping and pyrosequencing verification results for non-escaper gene *HPRT1* in opossum fetal brain and EEM samples.**

(A) F1 cross of LL1 (mother) x LL2 (father). (B) Reciprocal F1 cross of LL2 (mother) x LL1 (father). (C). LL1 parental cross. (D). LL2 parental cross. From the Sanger sequencing genotyping results, the SNP (OMSNP0222971) is informative in three embryos (571E1, 571E4 and 572E1). In brain/head and EEM tissues of all three individuals, 100% maternal expression was observed from both RNA-seq and allele-specific pyrosequencing verification. Therefore, *HPRT1* is subject to imprinted XCI with zero paternal leakage in both tissues. The target sequence for pyrosequencing is (T/C)TTATCTCC.

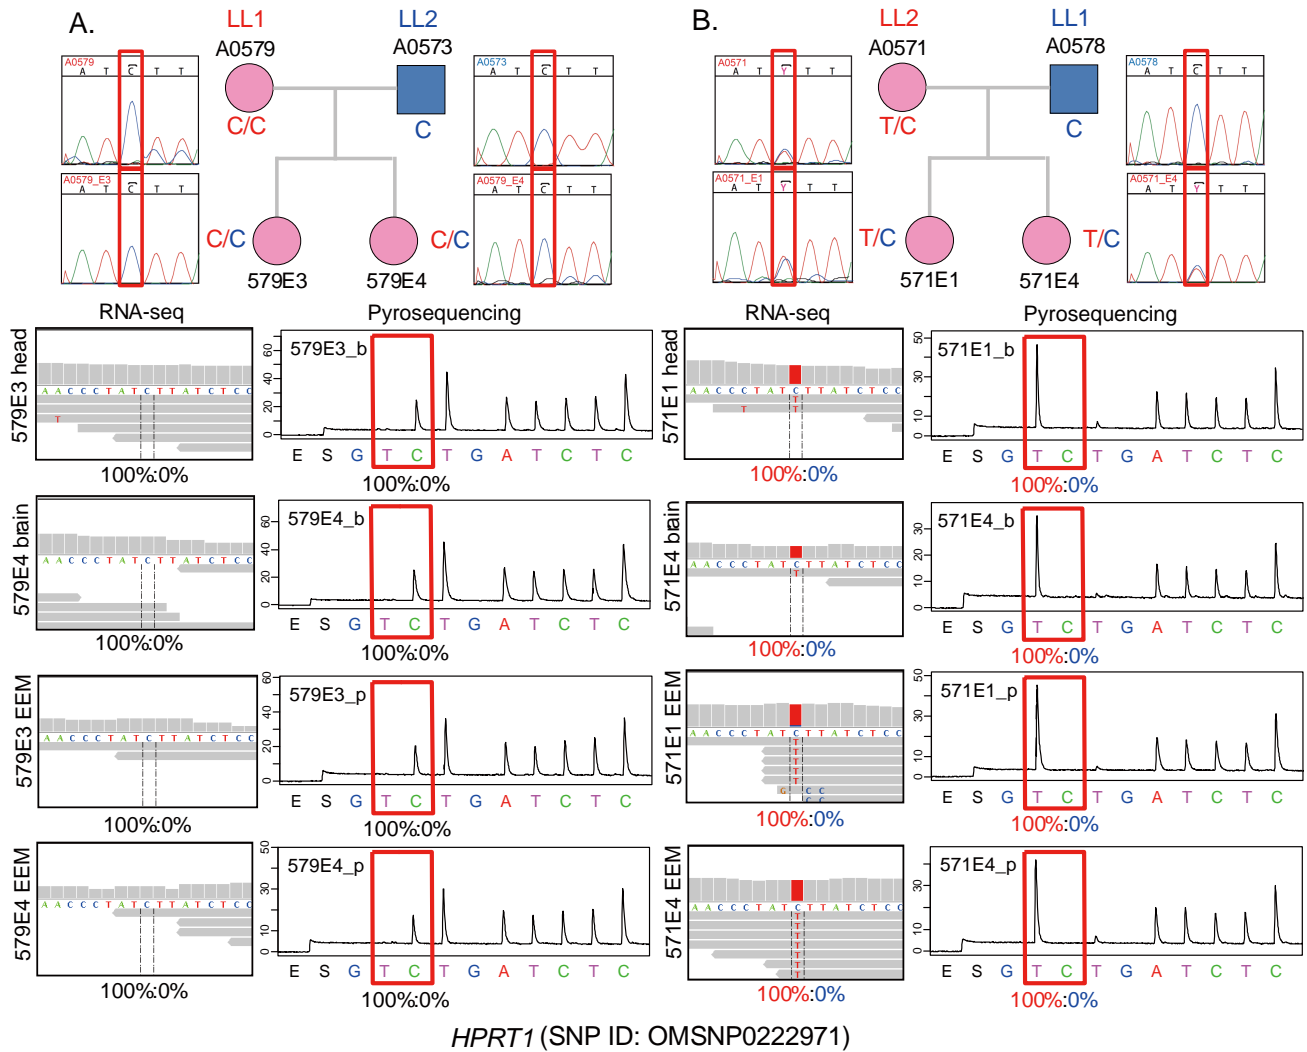

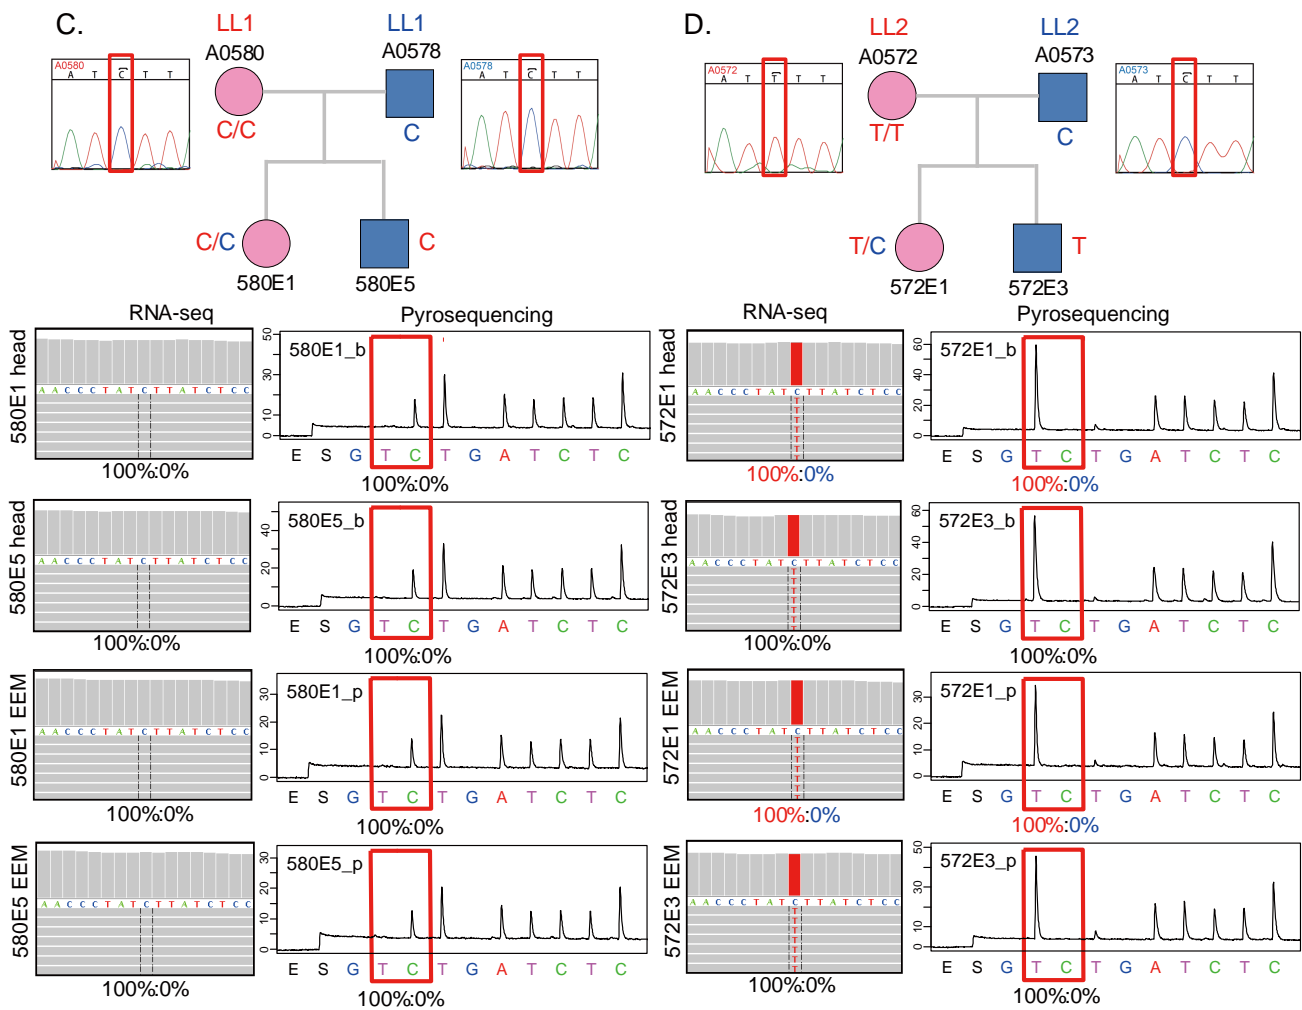

*HPRT1* (SNP ID: OMSNP0222971)

**Figure S5. RNA-seq, SNP genotyping and pyrosequencing verification results for autosomal control gene *GPM6B* in opossum fetal brain and EEM samples.**

(A). F1 cross of LL1 (mother) x LL2 (father). (B) Reciprocal F1 cross of LL2 (mother) x LL1 (father). (C). LL1 parental cross. (D). LL2 parental cross. *GPM6B* is an autosomal gene in opossum on chromosome 7. From the Sanger sequencing genotyping results, the SNP (chr7\_27283330) is informative in three embryos (579E3, 579E4 and 571E4). In brain/head and EEM tissues of all three individuals, biallelic expression was observed from both RNA-seq and allele-specific pyrosequencing verification, which is expected for autosomal genes with two parental alleles. The target sequence for pyrosequencing is (T/C)GAGACT. The Sanger sequencing traces were not shown here because an indel polymorphism in the amplicon shifted the trace, but the genotypes could be determined by the software.

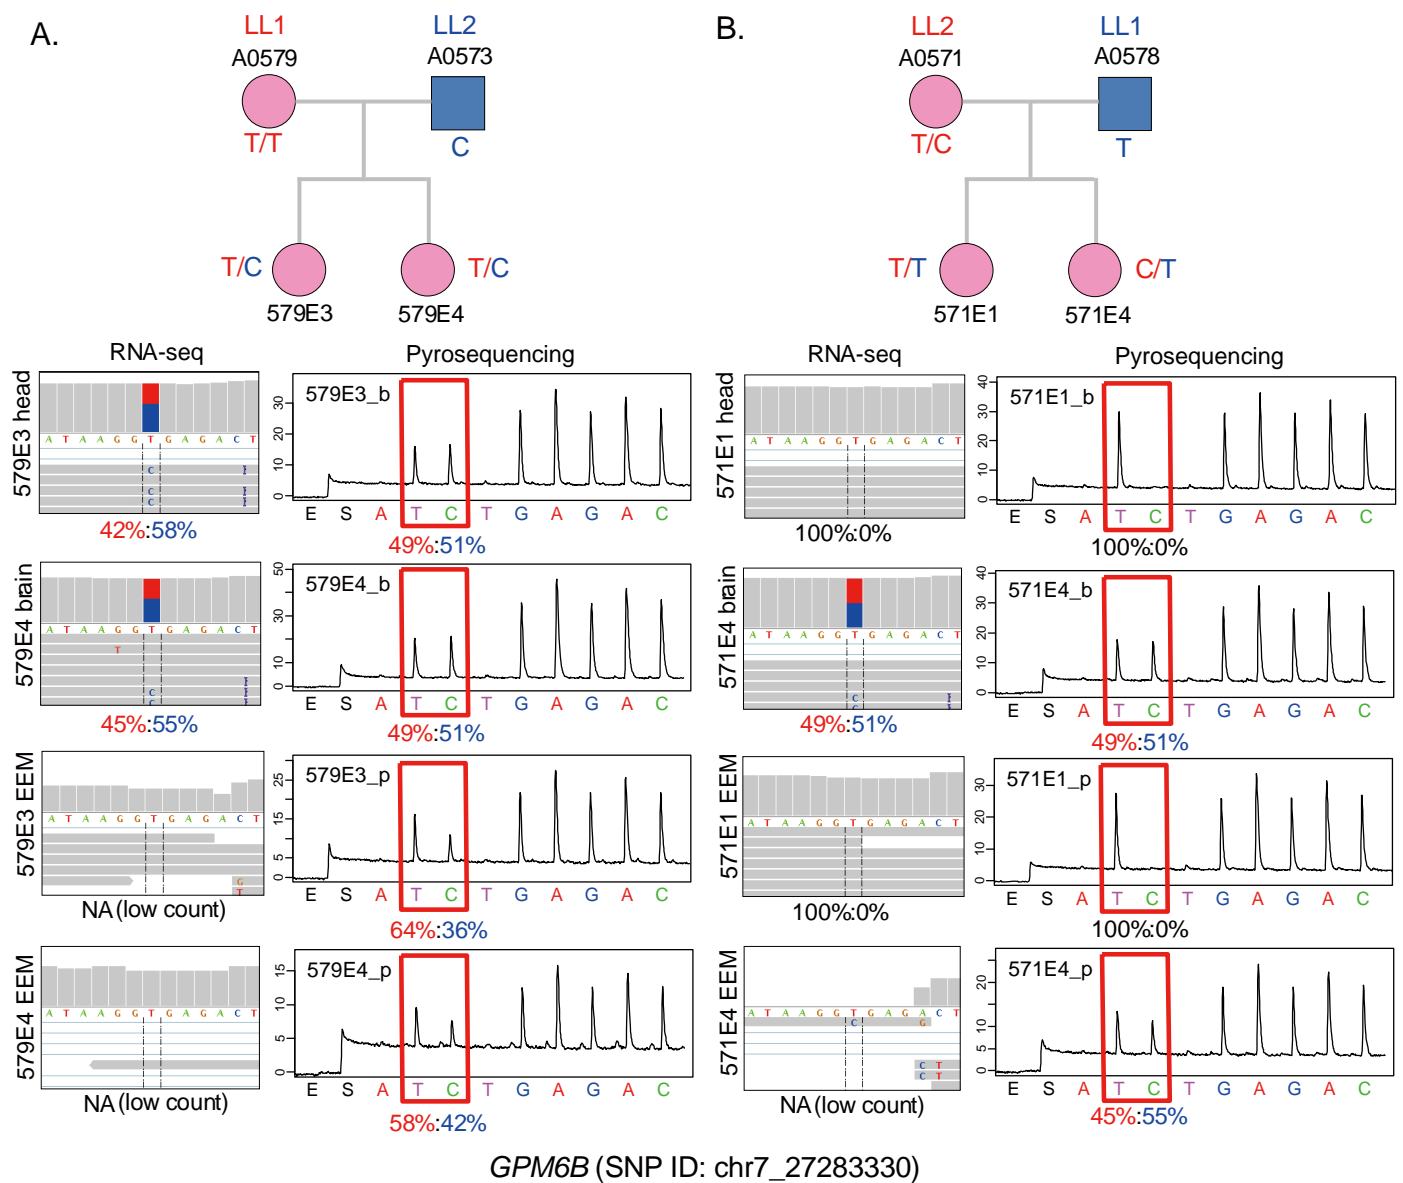



**Figure S6. RNA-seq, SNP genotyping and pyrosequencing verification results in parental crosses for escaper gene *YIPF6* in opossum fetal brain and EEM samples.**

(A). LL1 parental cross. (B). LL2 parental cross. From the Sanger sequencing genotyping results, the SNP (OMSNP0155110) is informative in one embryo (572E1) in the LL2 x LL2 parental cross shown here, and in four embryos (579E3, 579E4, 571E1 and 571E4) in the F1 hybrid crosses shown in Figure 2A-D. Therefore, *YIPF6* is an escaper of imprinted XCI in both tissues. The target sequence for pyrosequencing is GA(T/C)GACTA (on the opposite strand).

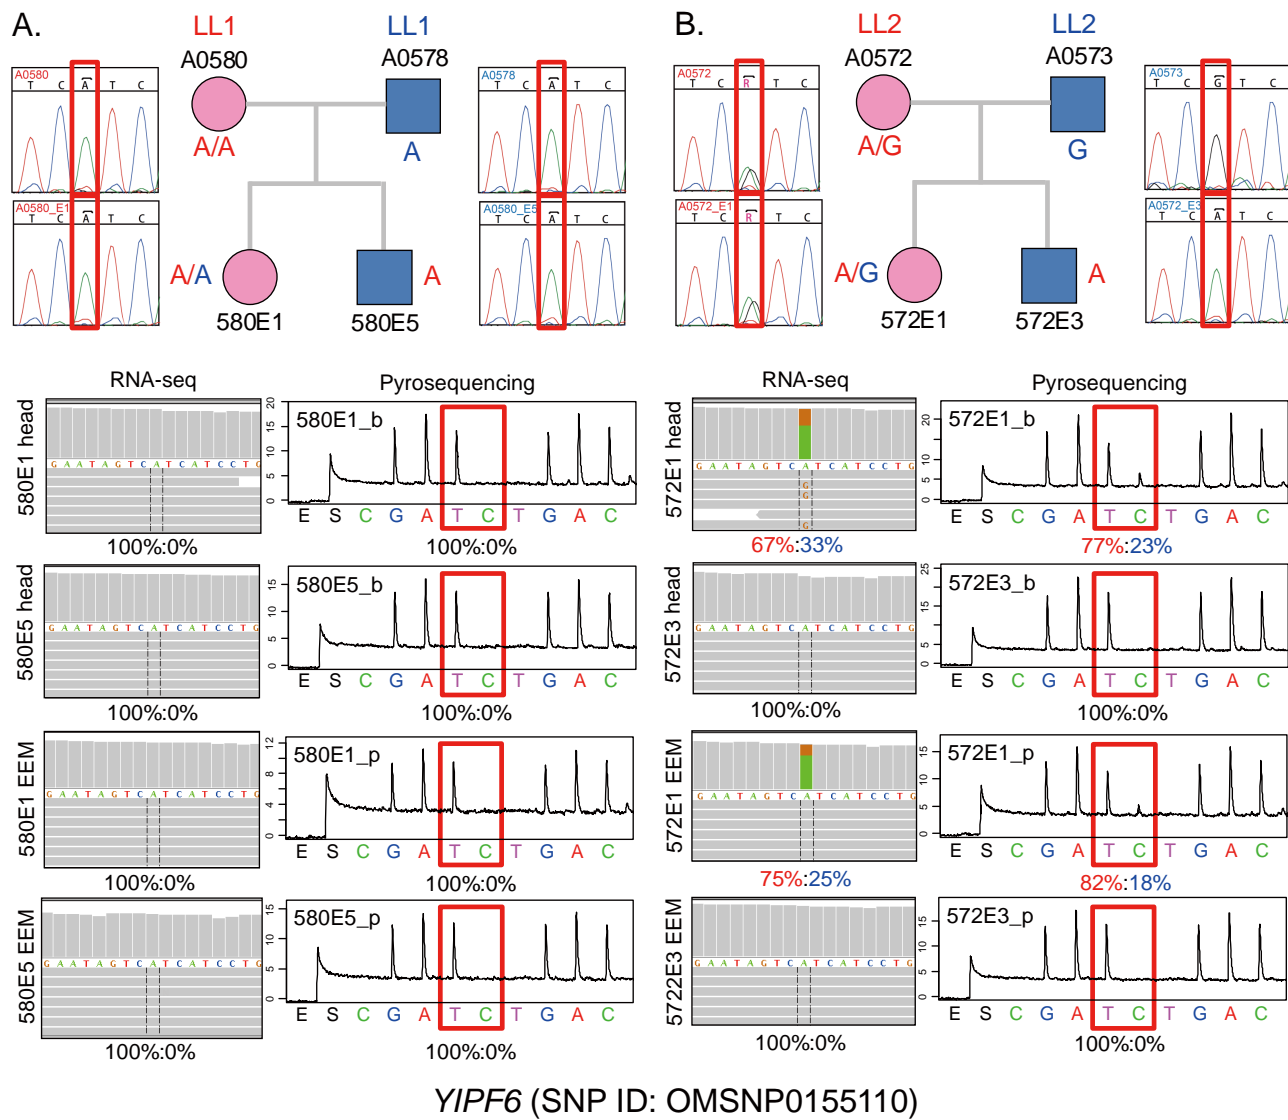



**Figure S7. RNA-seq, SNP genotyping and pyrosequencing verification results for escaper gene *CD99L2* in opossum fetal brain and EEM samples.**

(A). F1 cross of LL1 (mother) x LL2 (father). (B) Reciprocal F1 cross of LL2 (mother) x LL1 (father). (C). LL1 parental cross. (D). LL2 parental cross. From the Sanger sequencing genotyping results, the SNP (OMSNP0156126) is informative in three embryos (571E1, 571E4 and 572E1). In brain/head and EEM tissues of all three individuals, biallelic expression was observed from both RNA-seq and allele-specific pyrosequencing verification. Therefore, *CD99L2* is an escaper of imprinted XCI in both tissues. The target sequence for pyrosequencing is A(T/C)ATCATAG (on the opposite strand).

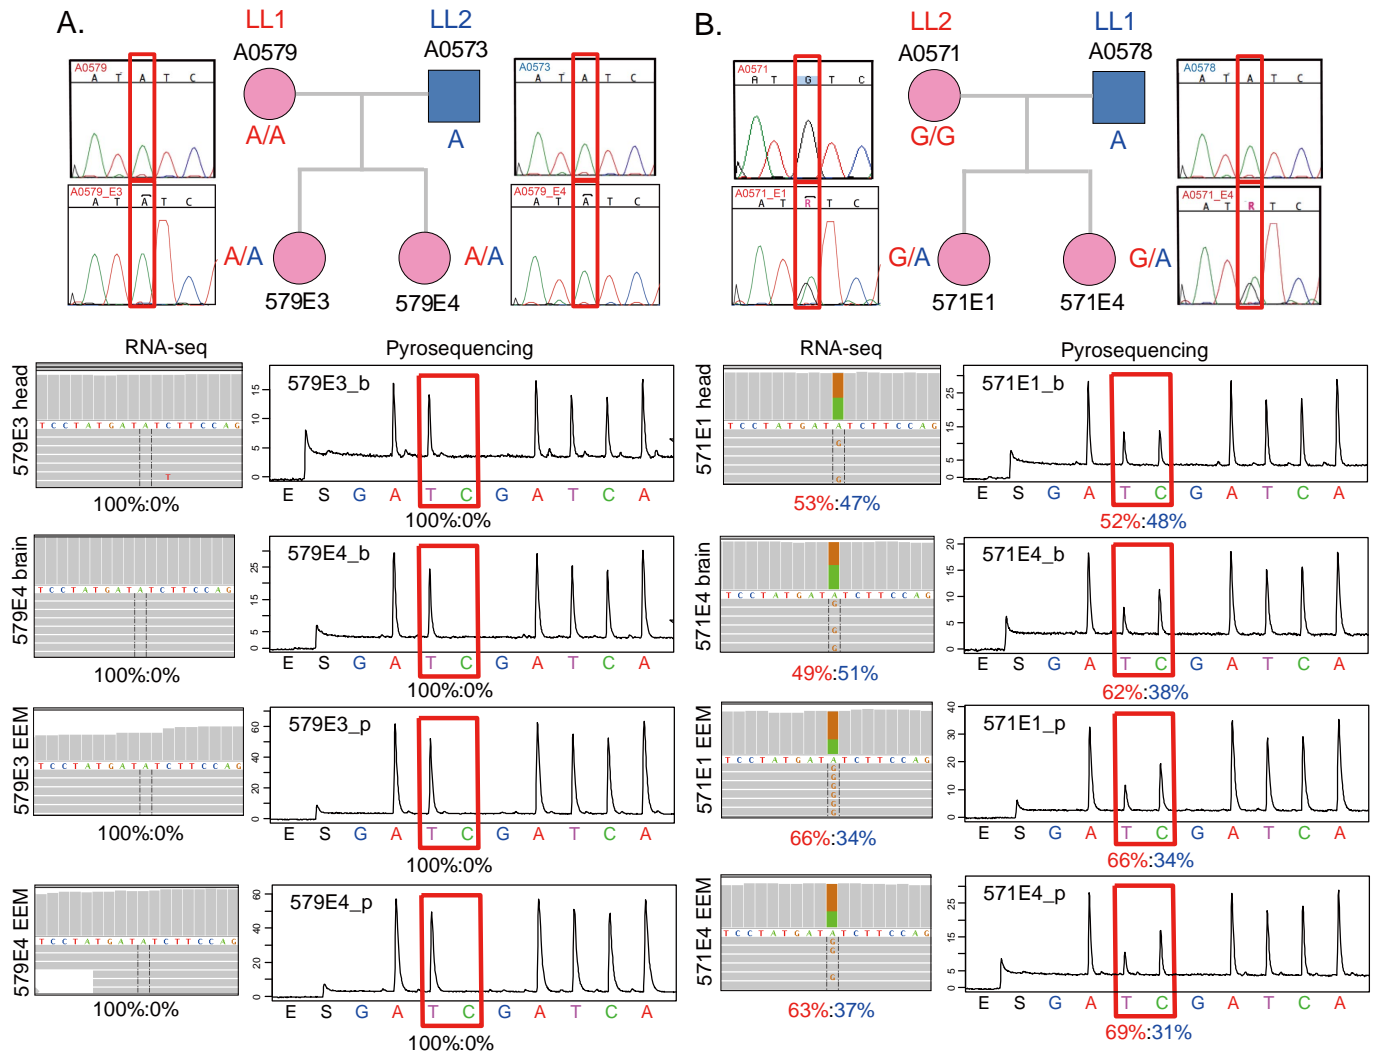

*CD99L2* (SNP ID: OMSN0156126)

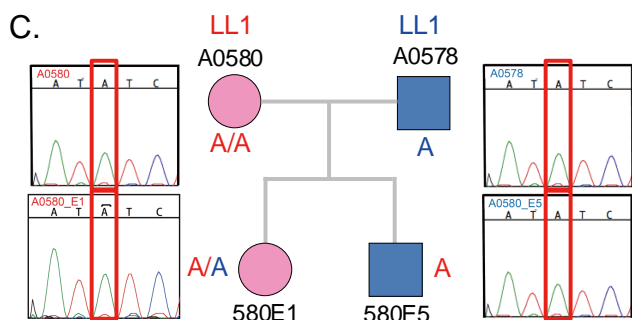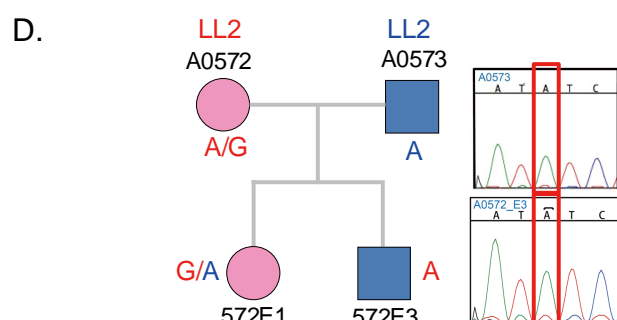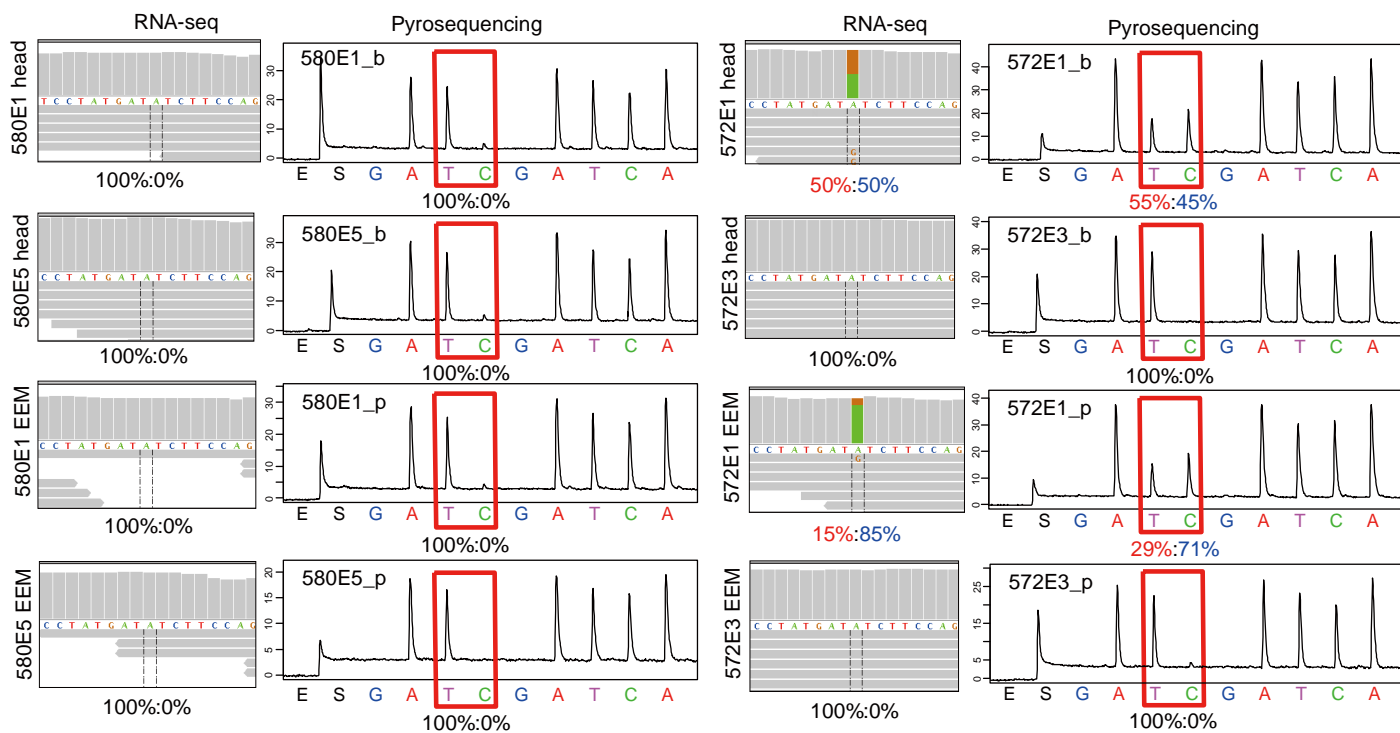

*CD99L2* (SNP ID: OMSNP0156126)

**Figure S8. RNA-seq, SNP genotyping and pyrosequencing verification results for escaper gene *TAF1* in opossum fetal brain and EEM samples.**

(A). F1 cross of LL1 (mother) x LL2 (father). (B) Reciprocal F1 cross of LL2 (mother) x LL1 (father). (C). LL1 parental cross. (D). LL2 parental cross. From the Sanger sequencing genotyping results, the SNP (OMSNP0156862) is informative in five embryos (579E3, 579E4, 571E1, 571E4 and 580E1). In brain/head and EEM tissues of all five individuals, biallelic expression was observed from both RNA-seq and allele-specific pyrosequencing verification. Therefore, *TAF1* is an escaper of imprinted XCI in both tissues. The target sequence for pyrosequencing is (A/G)AGGCGCTTA.

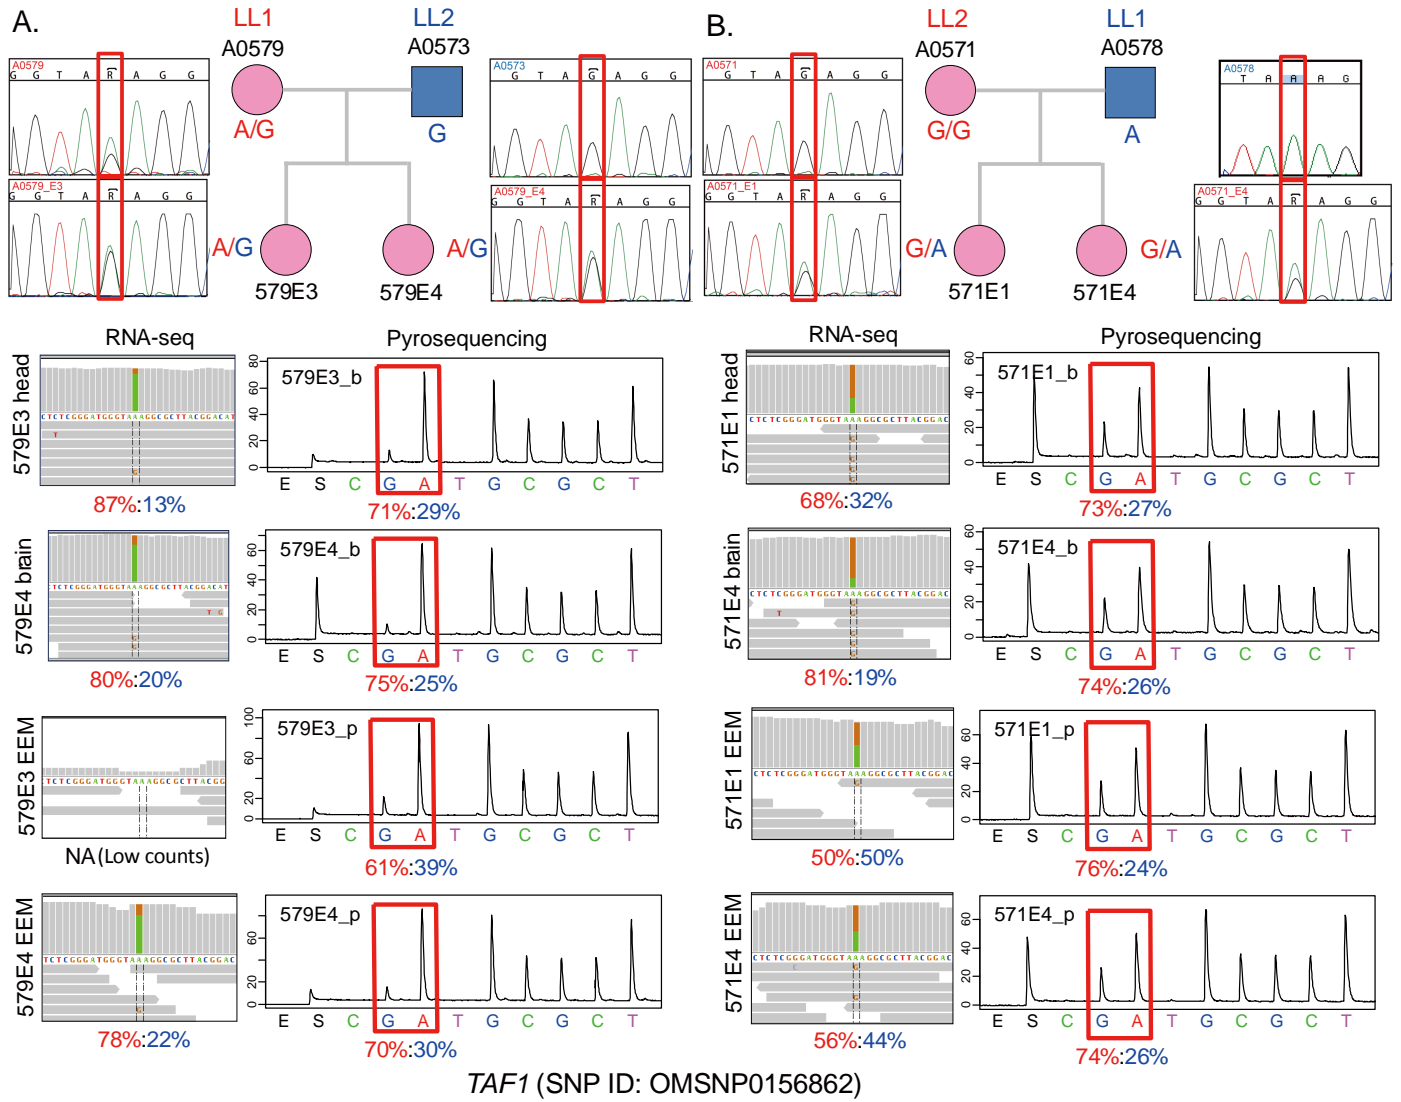

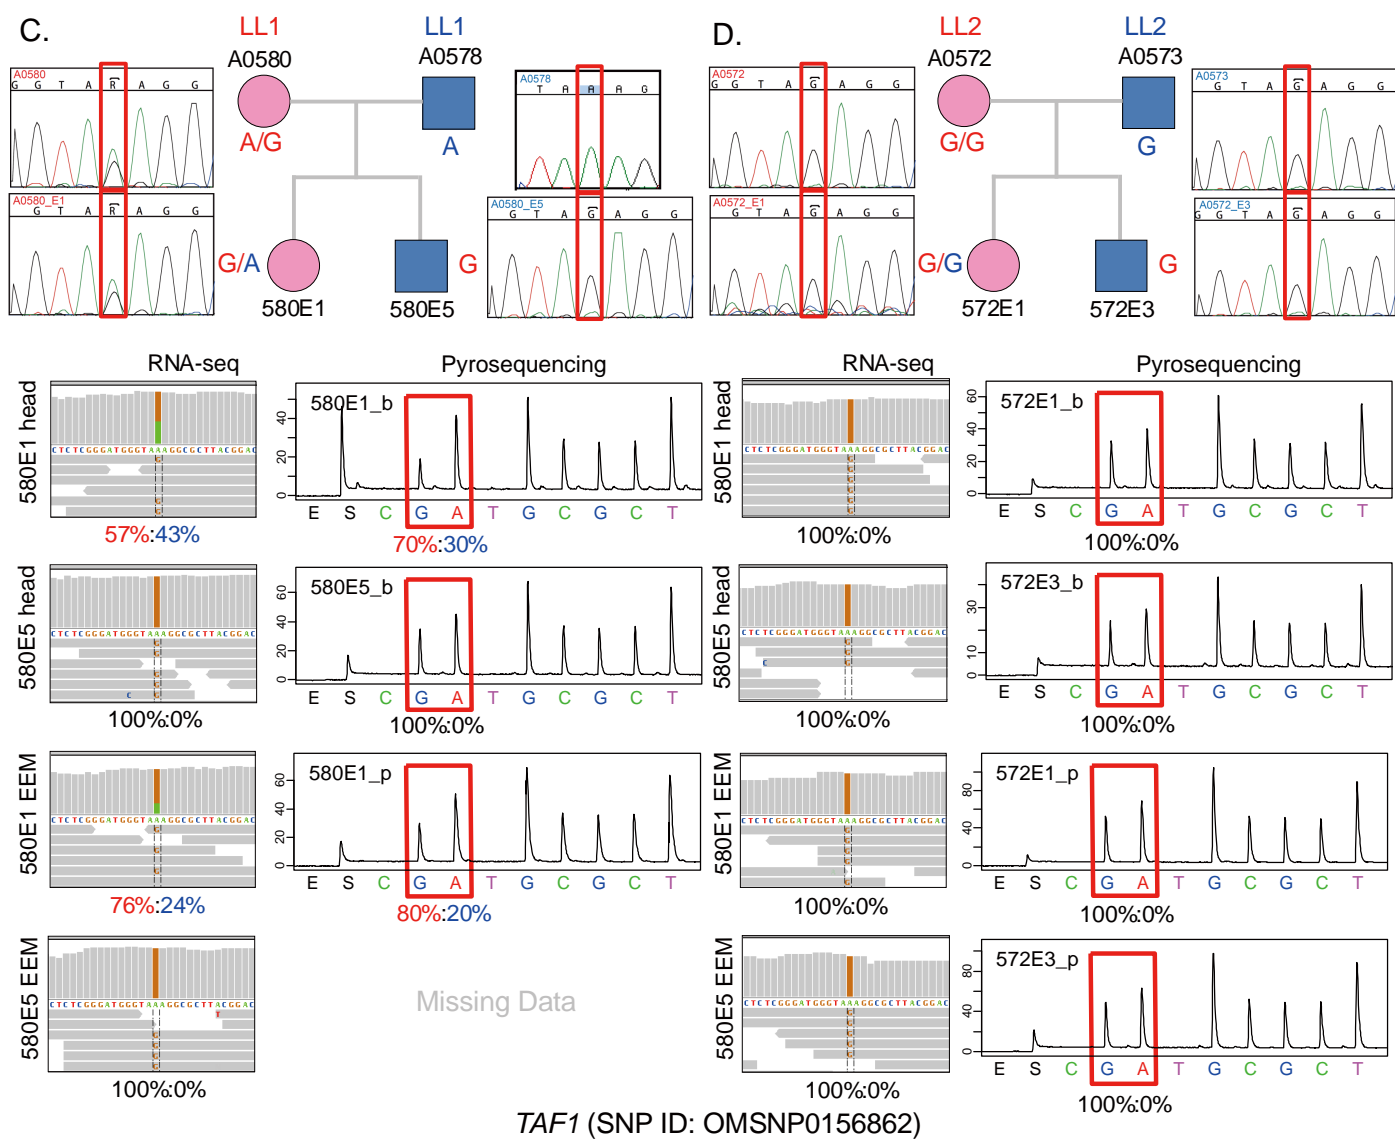

**Figure S9. RNA-seq, SNP genotyping and pyrosequencing verification results for escaper gene *HMGB3* in opossum fetal brain and EEM samples.**

(A). F1 cross of LL1 (mother) x LL2 (father). (B) Reciprocal F1 cross of LL2 (mother) x LL1 (father). (C). LL1 parental cross. (D). LL2 parental cross. From the Sanger sequencing genotyping results, the SNP (OMSNP0156138) is informative in three embryos (571E1, 571E4 and 572E1). In brain/head and EEM tissues of all three individuals, biallelic expression was observed from both RNA-seq and allele-specific pyrosequencing verification. Therefore, *HMGB3* is an escaper of imprinted XCI in both tissues. The target sequence for pyrosequencing is T(C/T)ATTGTTTTTACC.

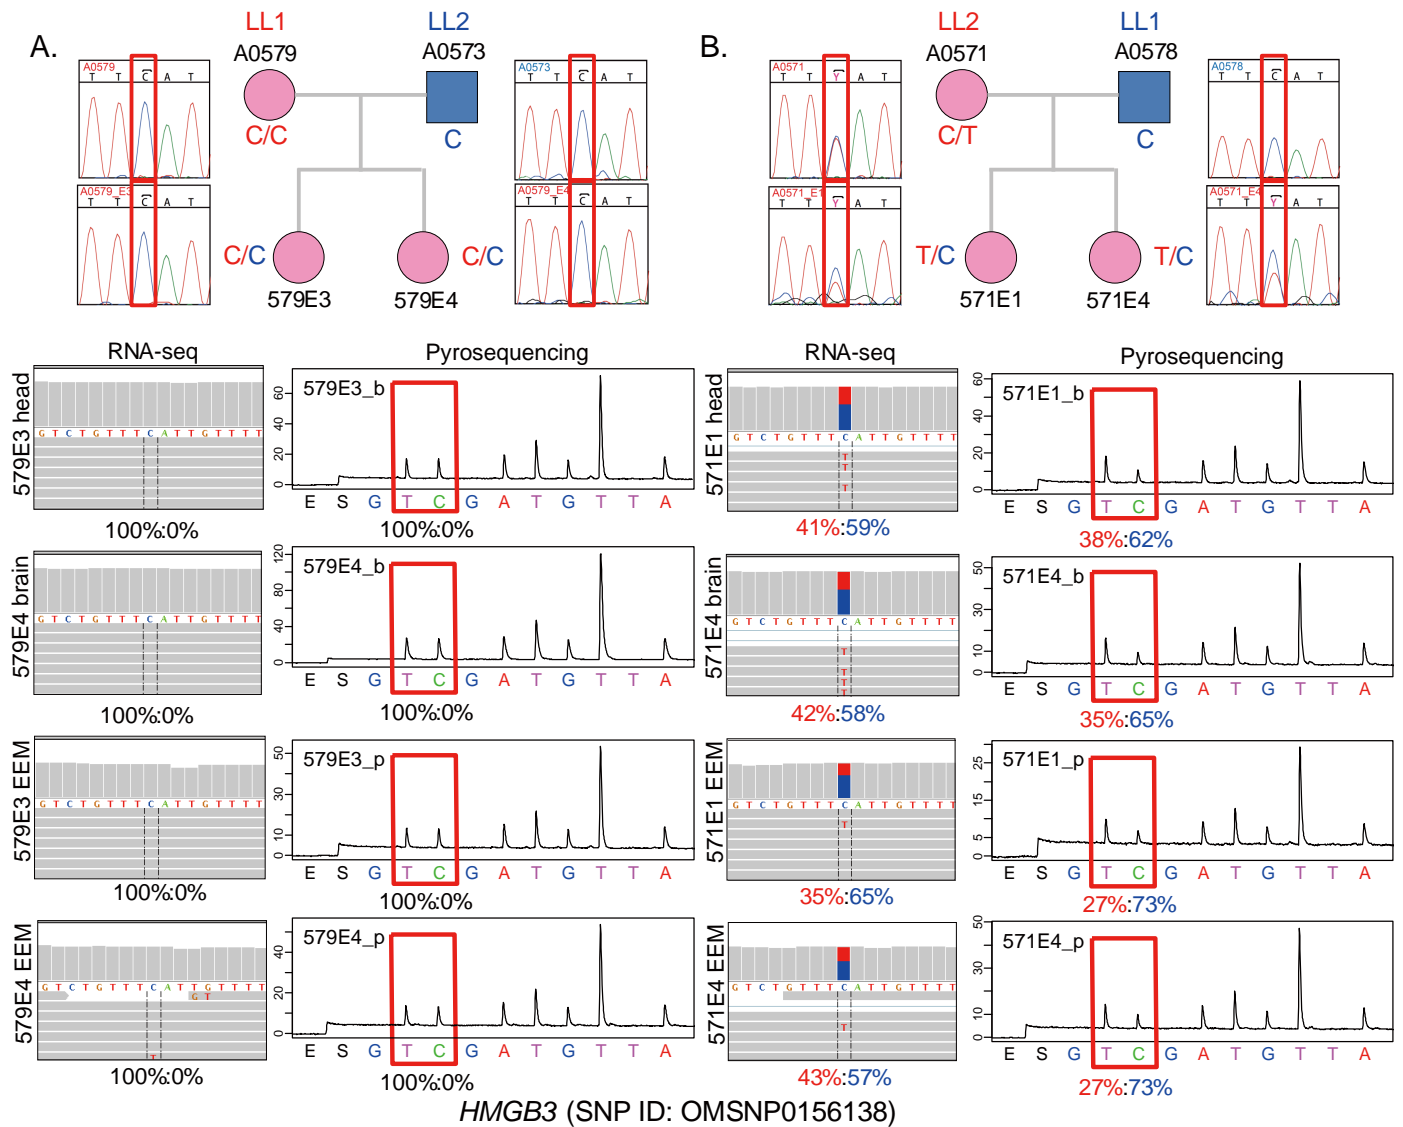

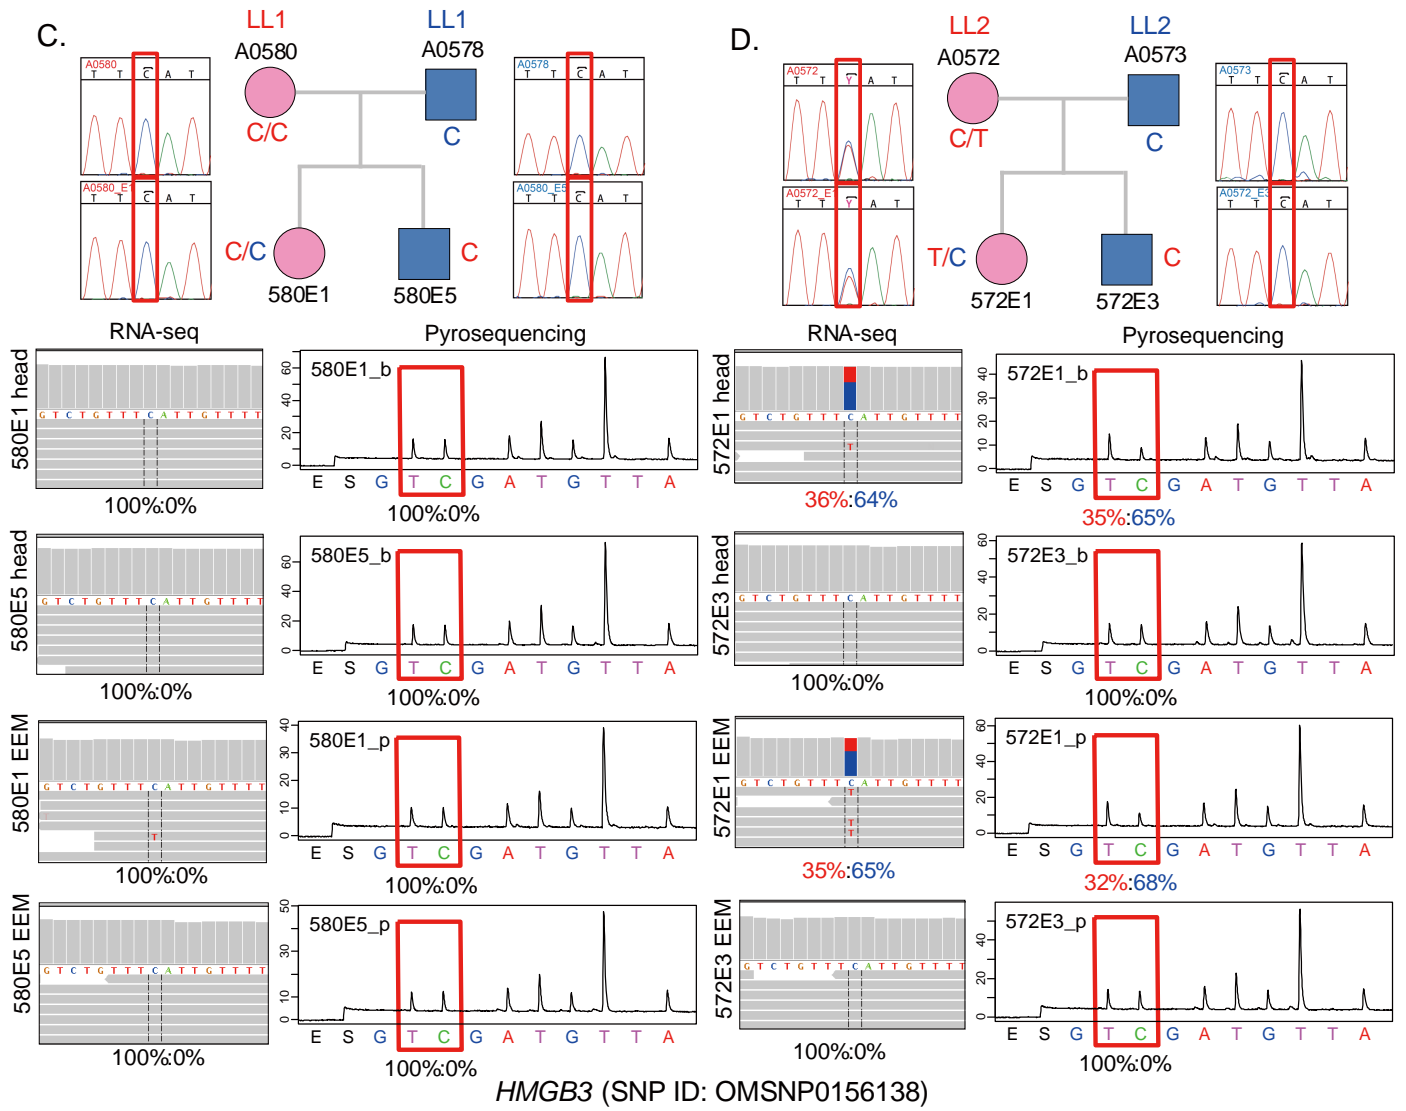

**Figure S10. RNA-seq, SNP genotyping and pyrosequencing verification results for escaper gene *FLNA* in opossum fetal brain and EEM samples.**

(A). F1 cross of LL1 (mother) x LL2 (father). (B) Reciprocal F1 cross of LL2 (mother) x LL1 (father). (C). LL1 parental cross. (D). LL2 parental cross. From the Sanger sequencing genotyping results, the SNP (OMSNP0154784) is informative in five embryos (579E3, 579E4, 571E1, 571E4 and 572E1). In brain/head and EEM tissues of all five individuals, biallelic expression was observed from both RNA-seq and allele-specific pyrosequencing verification. Therefore, *FLNA* is an escaper of imprinted XCI in both tissues. The target sequence for pyrosequencing is (C/T)GCATCAGA (on the minus strand).

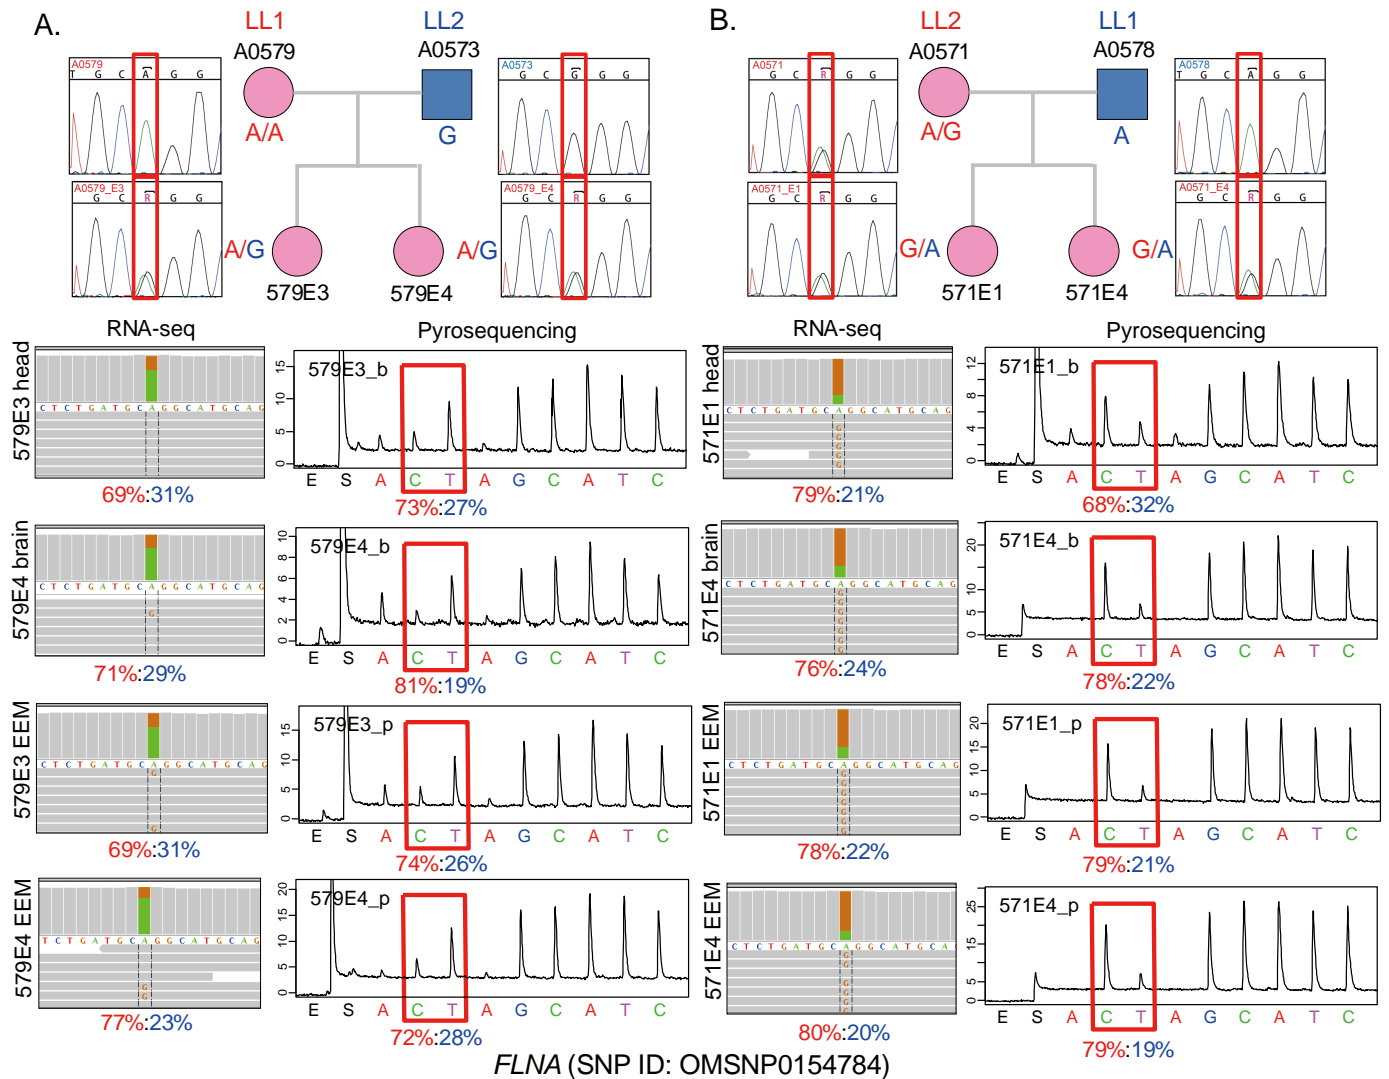

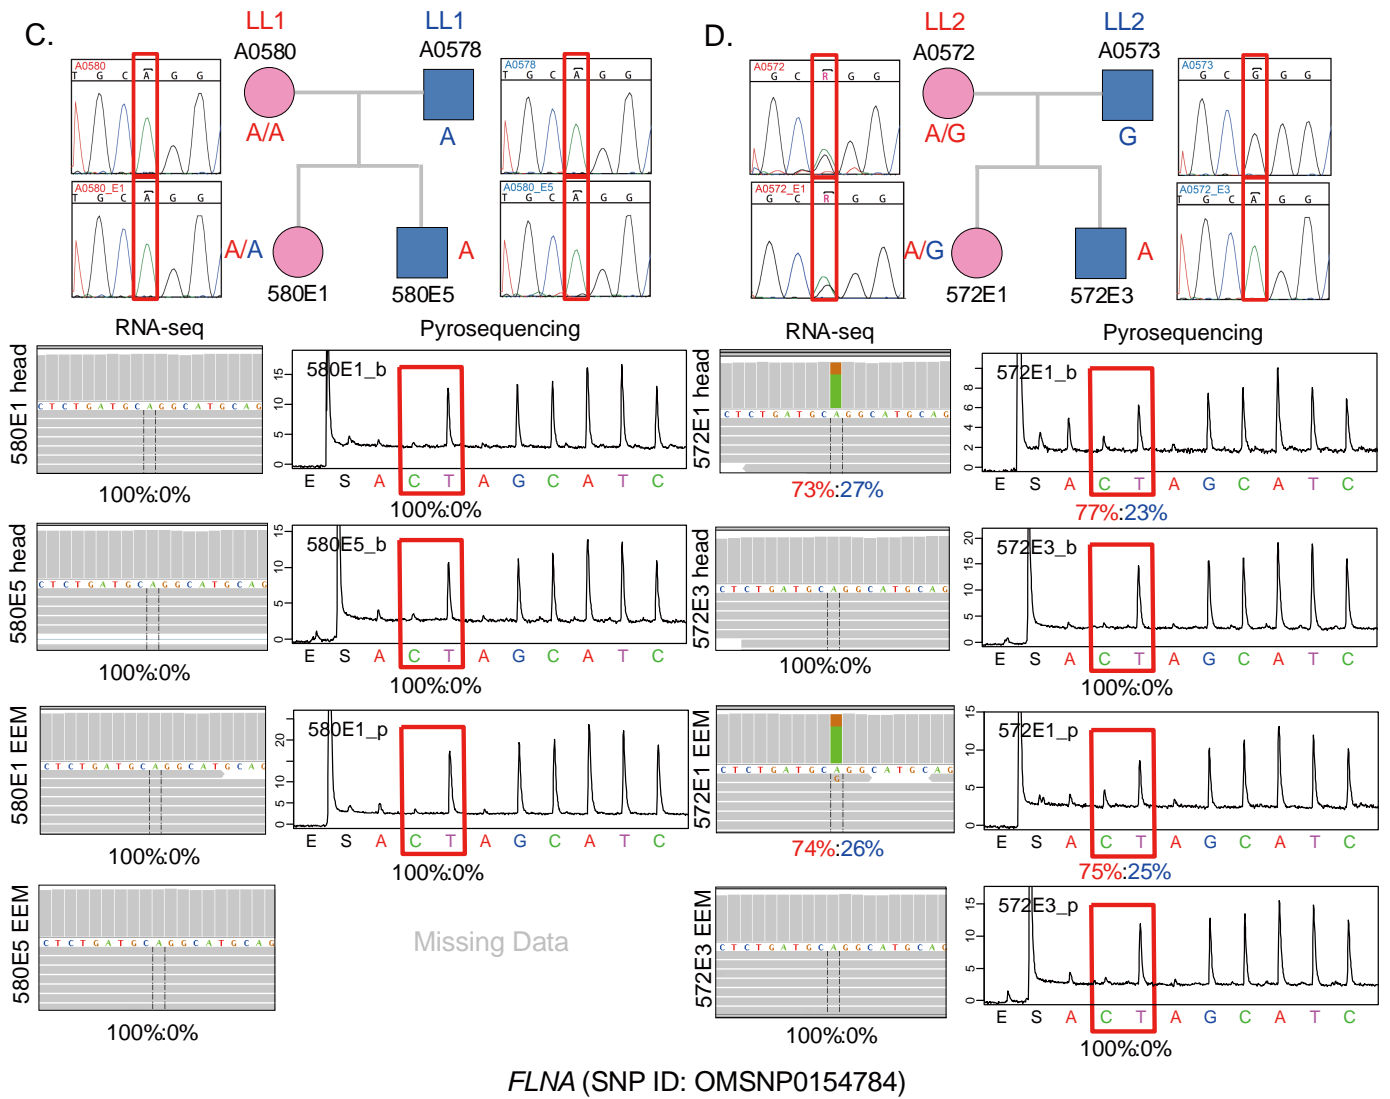



**Figure S11. RNA-seq, SNP genotyping and pyrosequencing verification results for escaper gene *RBMX* in opossum fetal brain and EEM samples.**

(A). F1 cross of LL1 (mother) x LL2 (father). (B) Reciprocal F1 cross of LL2 (mother) x LL1 (father). (C). LL1 parental cross. (D). LL2 parental cross. From the Sanger sequencing genotyping results, the SNP (OMSNP0156027) is informative in five embryos (579E3, 579E4, 571E1, 571E4 and 580E1). In brain/head and EEM tissues of all five individuals, biallelic expression was observed from both RNA-seq and allele-specific pyrosequencing verification. Therefore, *RBMX* is an escaper of imprinted XCI in both tissues. The target sequence for pyrosequencing is G(C/G)TATGGTGGT (on the minus strand).

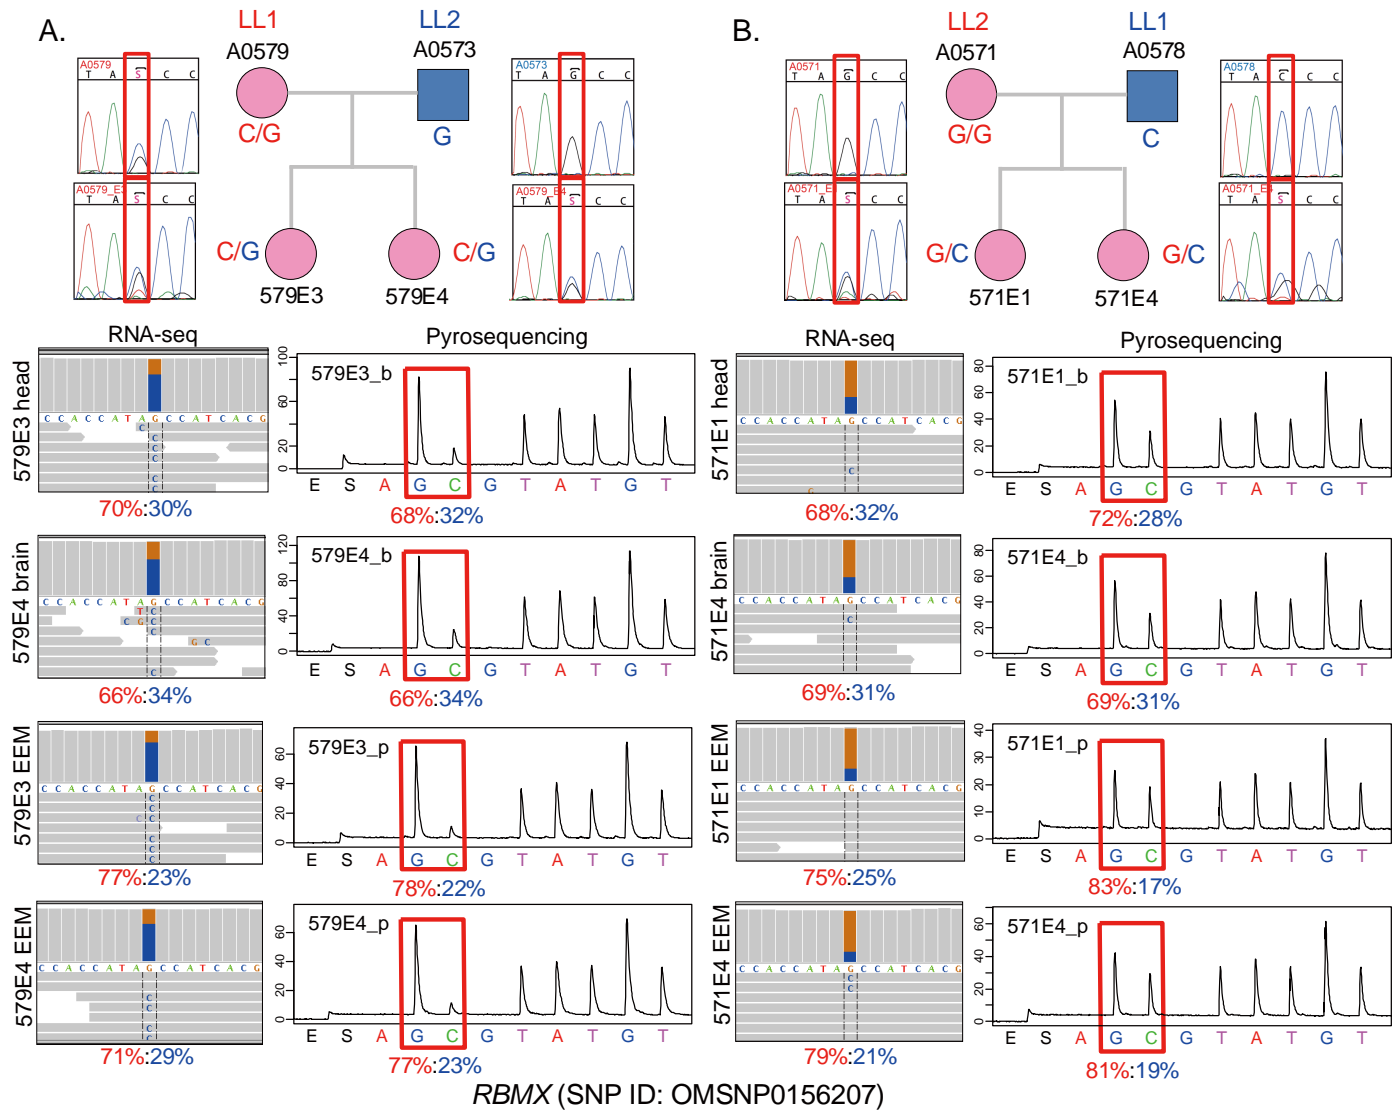

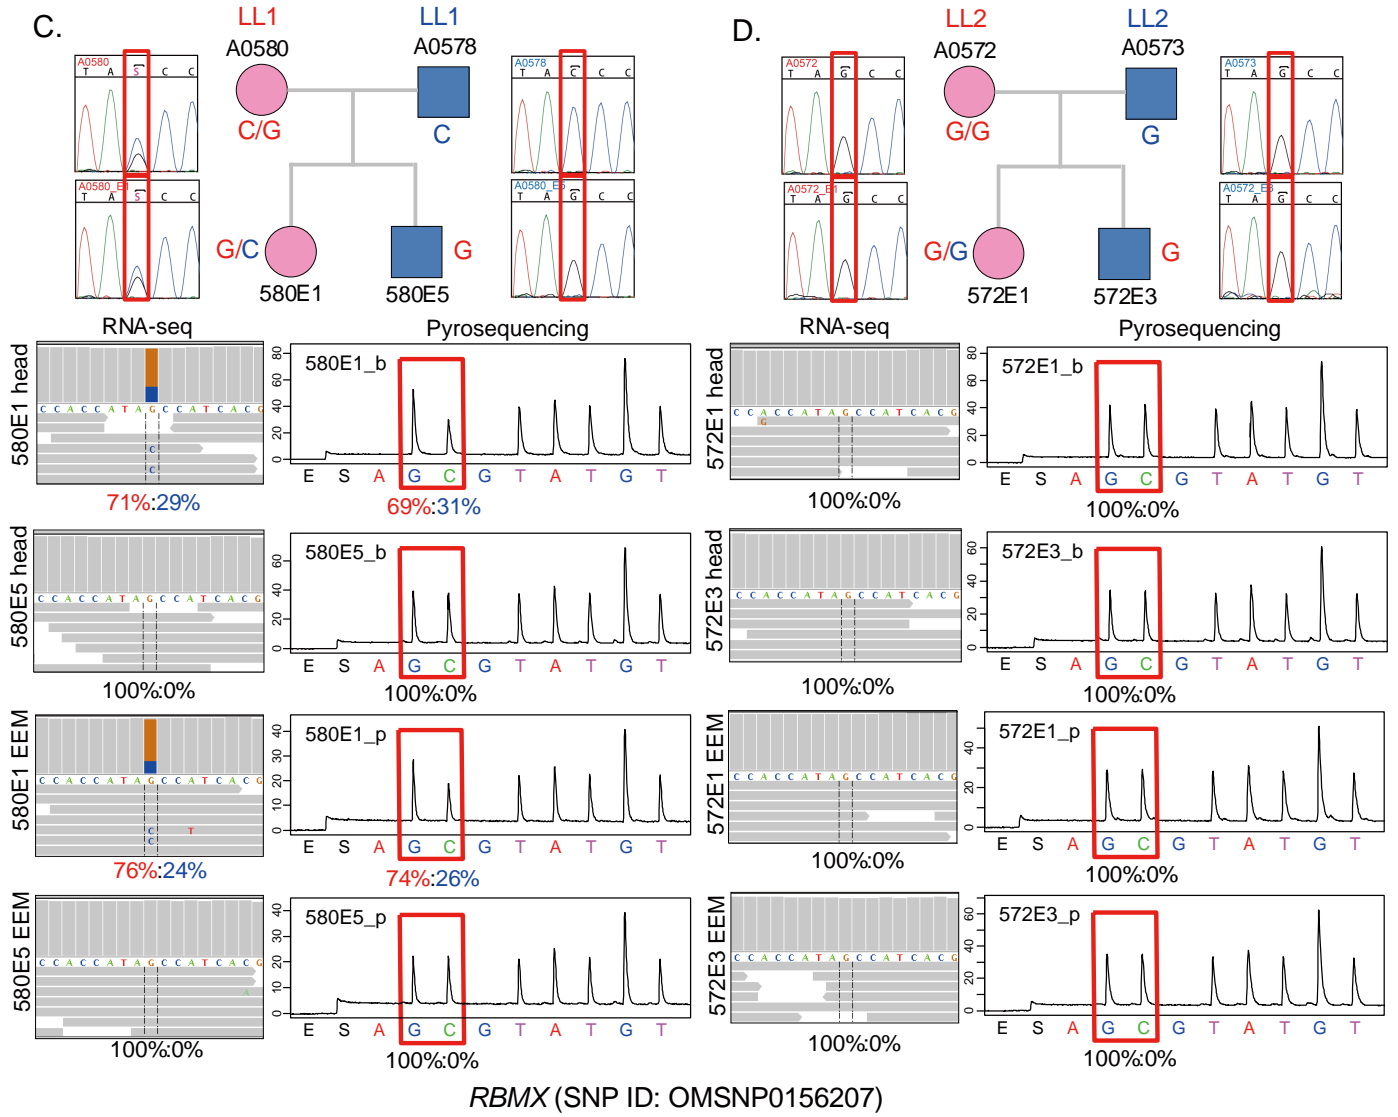

**Figure S12. RNA-seq, SNP genotyping and pyrosequencing verification results for escaper gene *G6PD* in opossum fetal brain and EEM samples.**

(A). F1 cross of LL1 (mother) x LL2 (father). (B) Reciprocal F1 cross of LL2 (mother) x LL1 (father). (C). LL1 parental cross. (D). LL2 parental cross. From the Sanger sequencing genotyping results, the SNP (OMSNP0154933) is informative in four embryos (579E3, 579E4, 571E1 and 571E4). In brain/head and EEM tissues of all four individuals, biallelic expression was observed from both RNA-seq and allele-specific pyrosequencing verification. Therefore, *G6PD* is an escaper of imprinted XCI in both tissues. The target sequence for pyrosequencing is CTC(C/T)GACAAG (on the minus strand). Pyrosequencing was not performed for parental crosses because they are not informative (C and D).

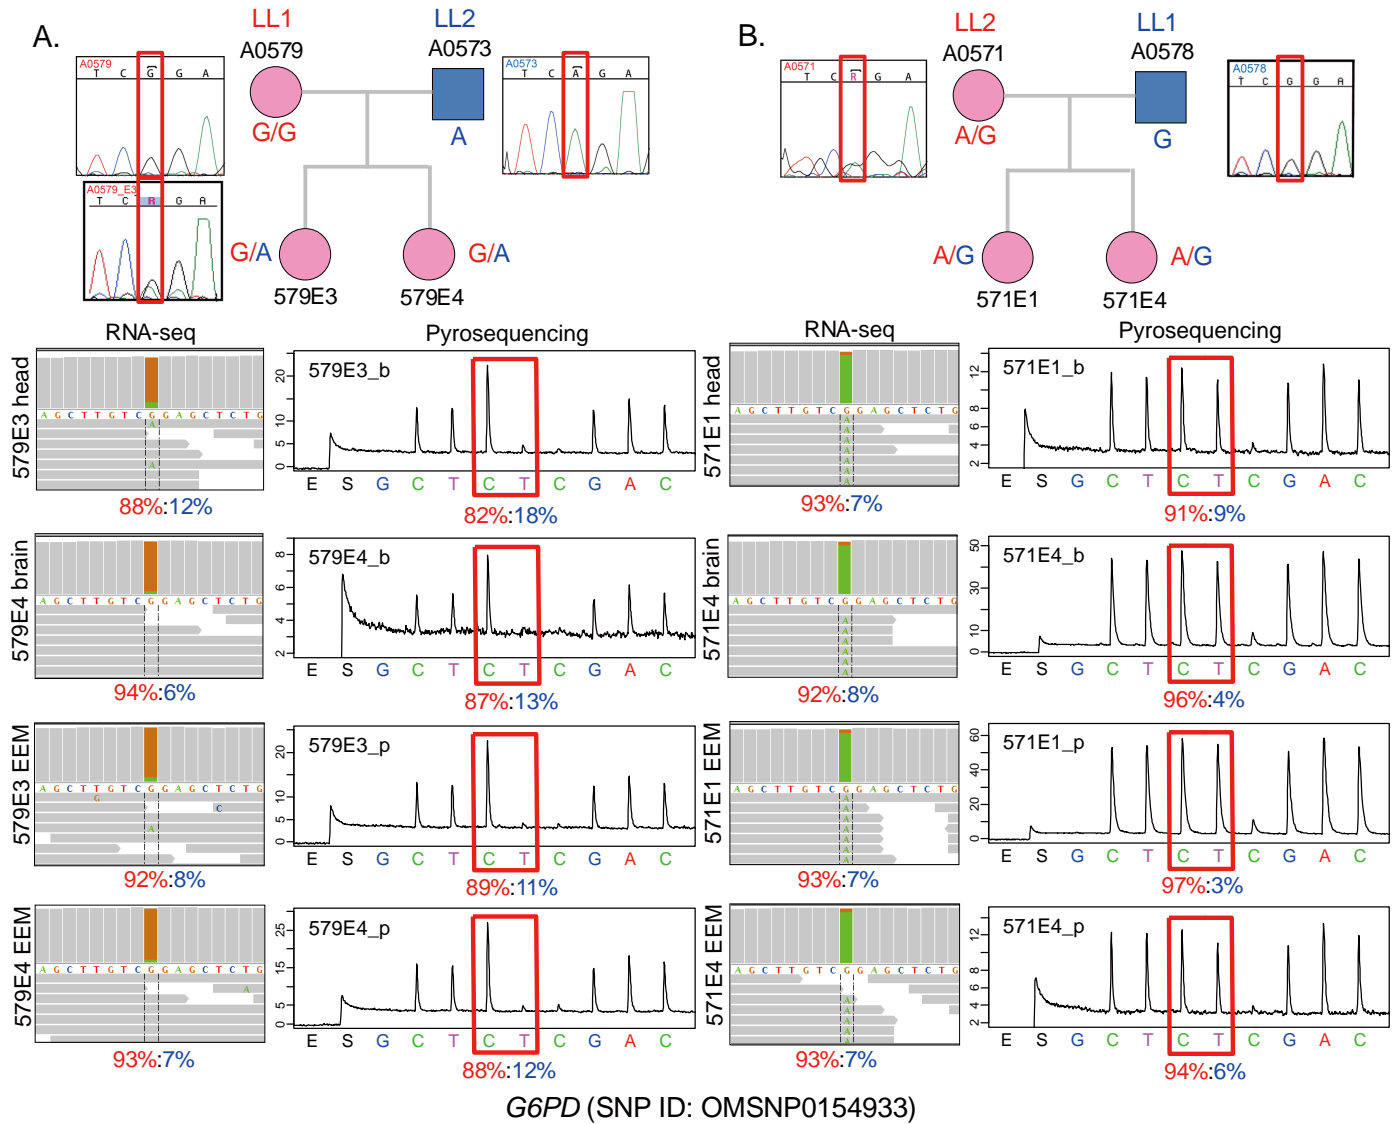

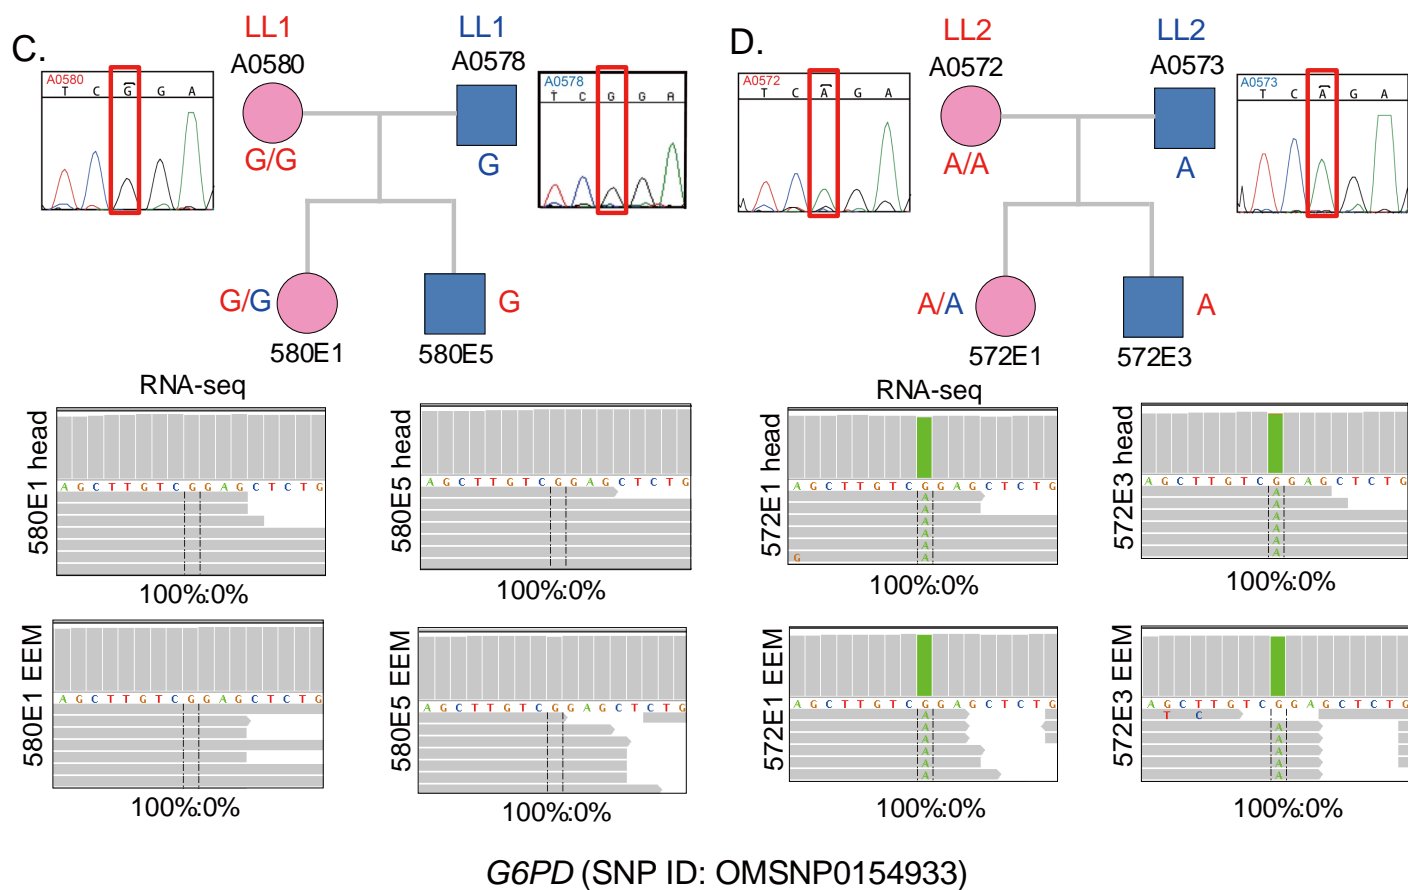

**Figure S13. RNA-seq, SNP genotyping and pyrosequencing verification results for escaper gene *ALAS2* in opossum fetal brain and EEM samples.**

(A). F1 cross of LL1 (mother) x LL2 (father). (B) Reciprocal F1 cross of LL2 (mother) x LL1 (father). (C). LL1 parental cross. (D). LL2 parental cross. From the Sanger sequencing genotyping results, the SNP (OMSNP0156832) is informative in three embryos (571E1, 571E4 and 572E1). In brain/head and EEM tissues of all three individuals, biallelic expression was observed from both RNA-seq and allele-specific pyrosequencing (572E1 has less than 10% paternal expression). Therefore, *ALAS2* is an escaper of imprinted XCI in both tissues. The target sequence for pyrosequencing is (C/T)GTTTCTGGAA.

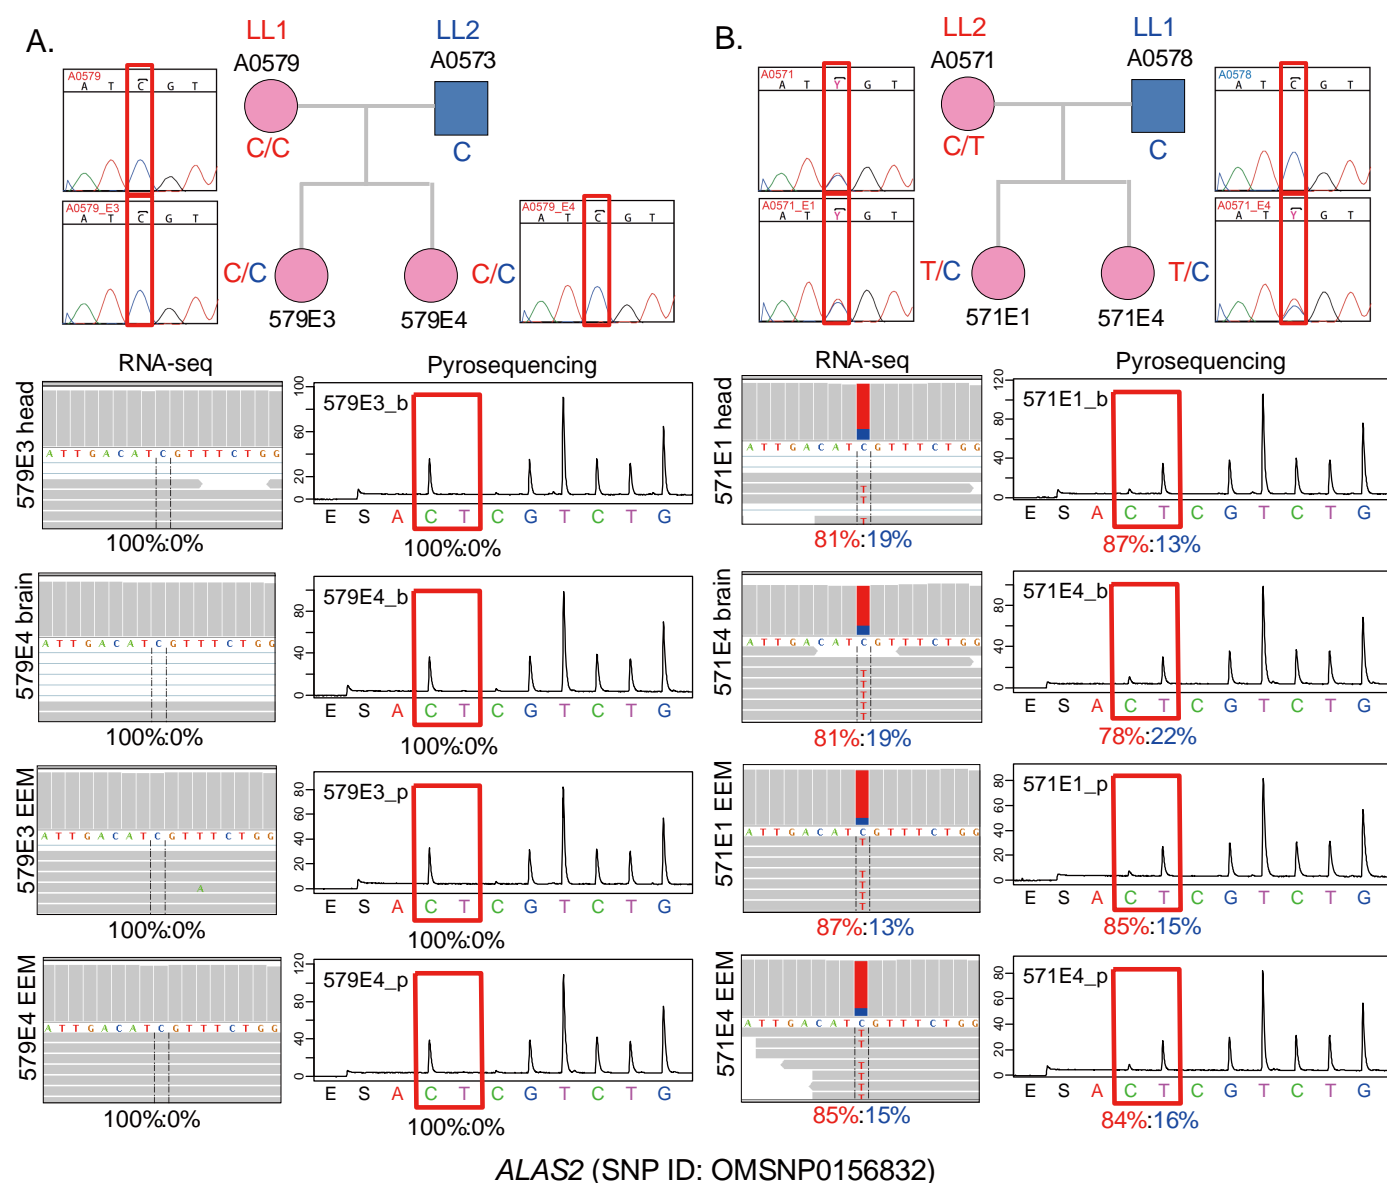

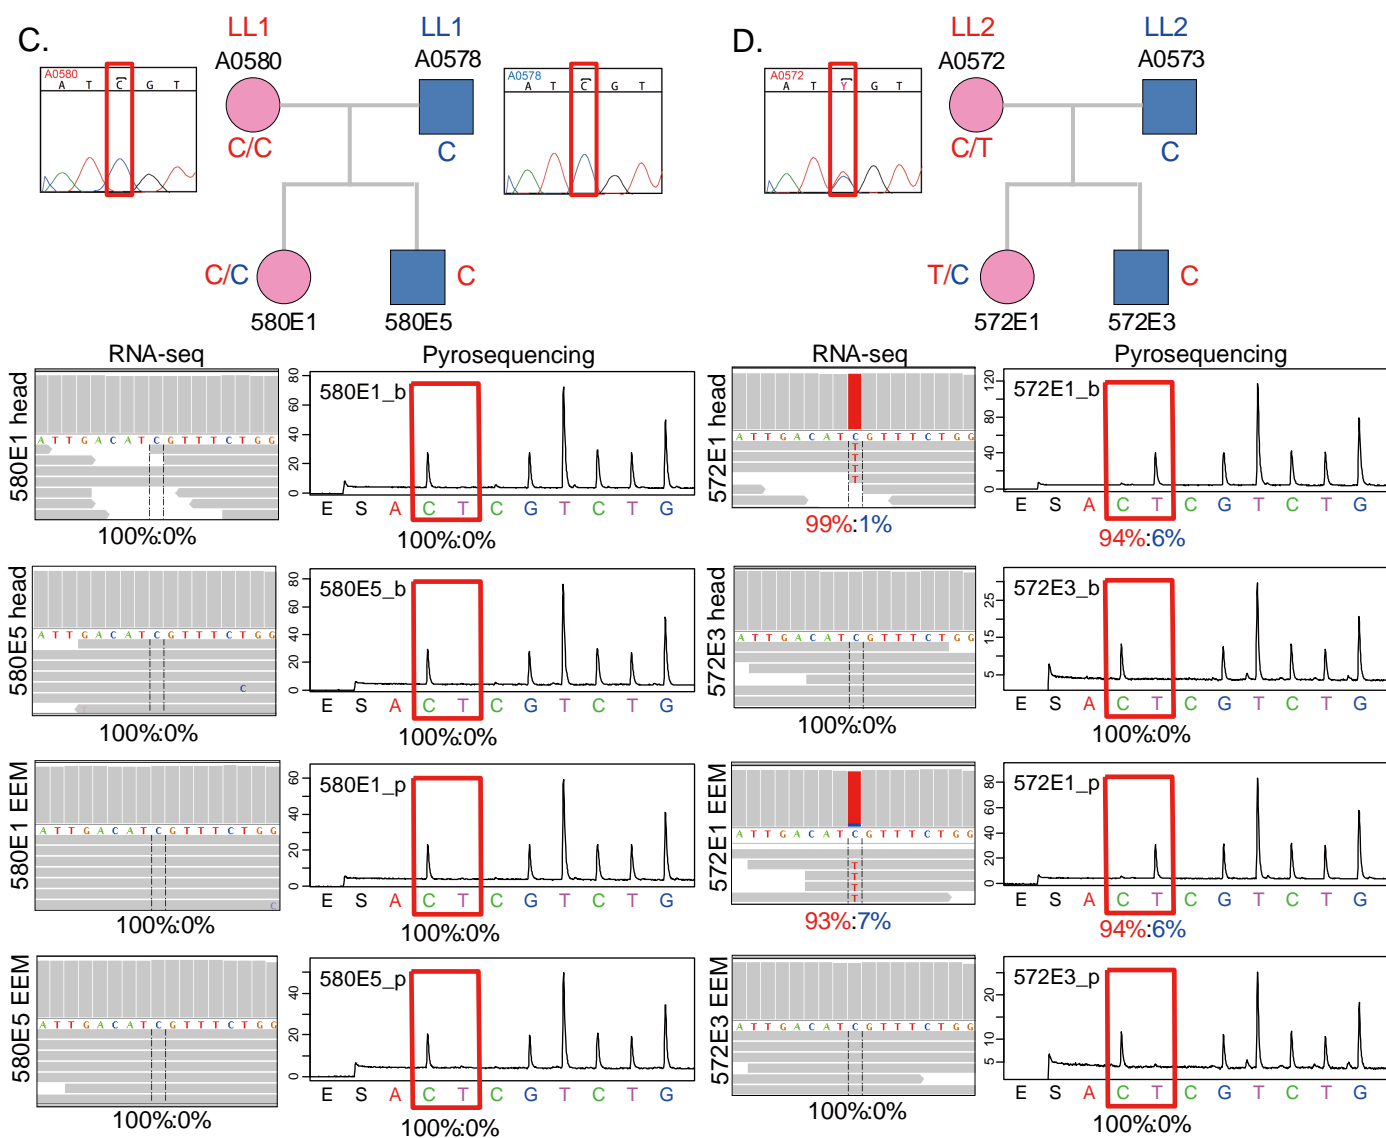

ALAS2 (SNP ID: OMSNP0156832)

**Figure S14. RNA-seq, SNP genotyping and pyrosequencing verification results for escaper gene *ATRX* in opossum fetal brain and EEM samples.**

(A). F1 cross of LL1 (mother) x LL2 (father). (B) Reciprocal F1 cross of LL2 (mother) x LL1 (father). (C). LL1 parental cross. (D). LL2 parental cross. From the Sanger sequencing genotyping results, the SNP (OMSNP0156416) is informative in three embryos (571E1, 571E4 and 572E1). In brain/head and EEM tissues of all three individuals, biallelic expression was observed from both RNA-seq and allele-specific pyrosequencing verification. Therefore, *ATRX* is an escaper of imprinted XCI in both tissues. The target sequence for pyrosequencing is (C/T)GCCCCACTGC (on the minus strand).

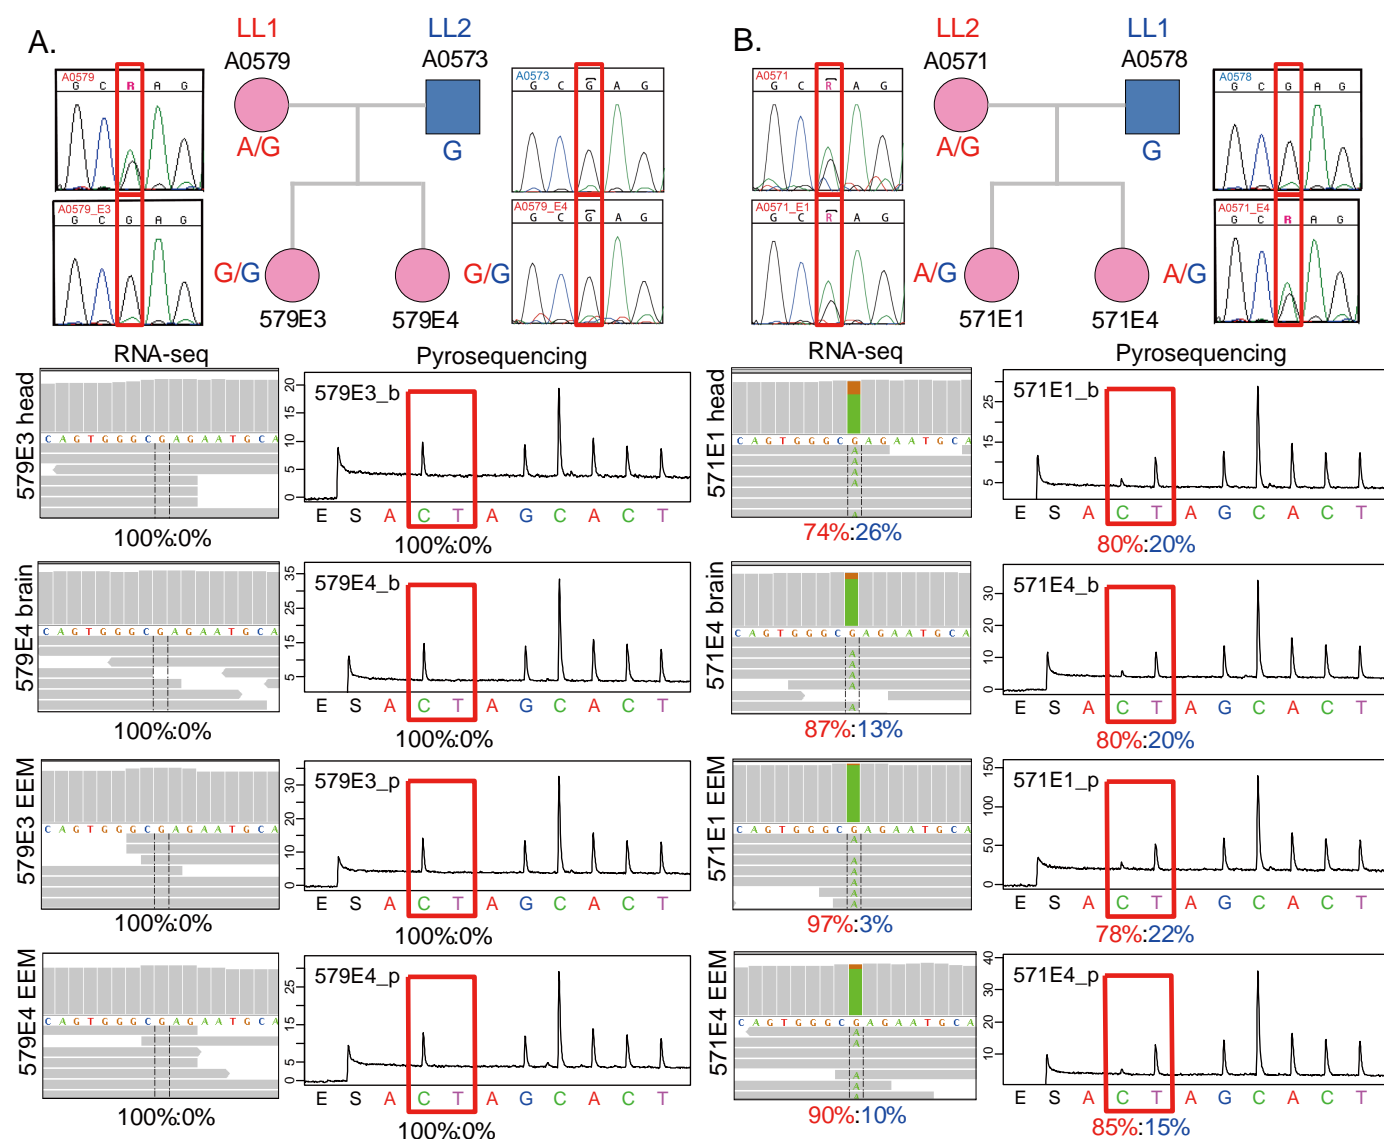

*ATRX* (SNP ID: OMSN0156416)

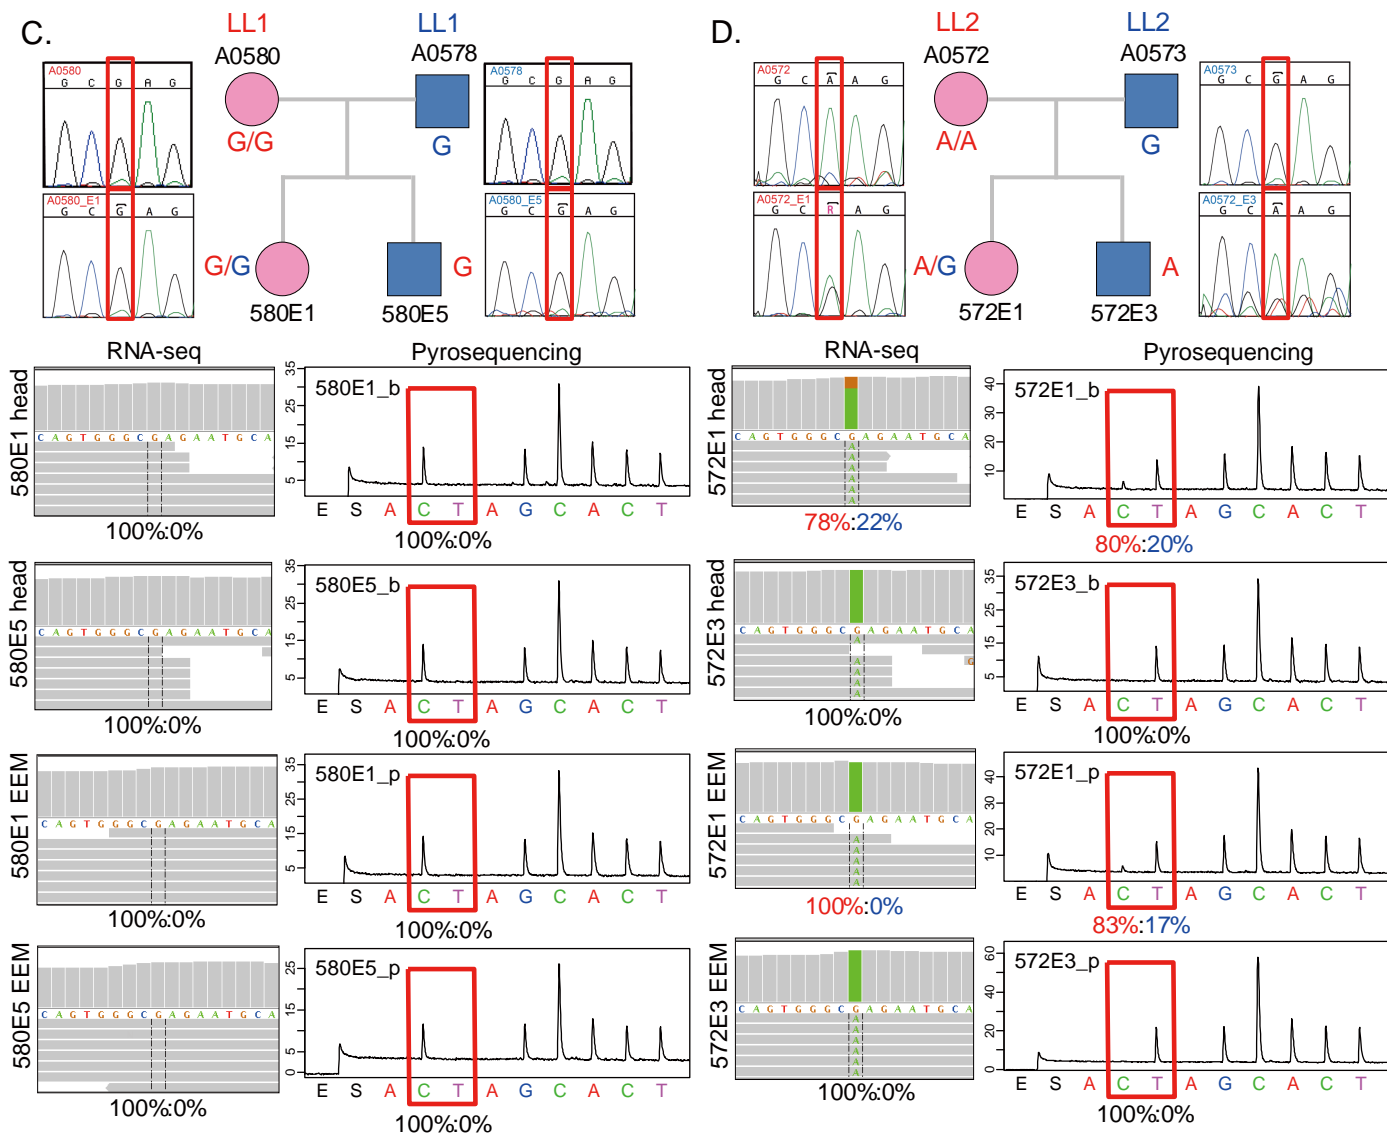

ATR<sub>X</sub> (SNP ID: OMSNP0156416)



**Figure S15. RNA-seq, SNP genotyping and pyrosequencing verification results for escaper gene *IRAK1* in opossum fetal brain and EEM samples.**

(A)-(D). Results for SNP OMSNP0155434. (A). F1 cross of LL1 (mother) x LL2 (father). (B) Reciprocal F1 cross of LL2 (mother) x LL1 (father). (C). LL1 parental cross. (D). LL2 parental cross. (E)-(H). Results for SNP OMSNP0155433. (E). F1 cross of LL1 (mother) x LL2 (father). (F) Reciprocal F1 cross of LL2 (mother) x LL1 (father). (G). LL1 parental cross. (H). LL2 parental cross. From the Sanger sequencing genotyping results, two SNPs (OMSNP0155434 and OMSNP0155433, 101bp apart) are informative in three embryos (579E3, 579E4 and 580E1). In brain/head and EEM tissues of all three individuals, biallelic expression was observed from both RNA-seq and allele-specific pyrosequencing verification, and the allelic expression percentages agreed well at the two SNP positions. Therefore, *IRAK1* is an escaper of imprinted XCI in both tissues. The target sequence for pyrosequencing is AGG(C/T)GAGGCC at SNP OMSNP0155434. The target sequence for pyrosequencing is (G/T)GAGGGGGCTGCCGA at SNP OMSNP0155433.

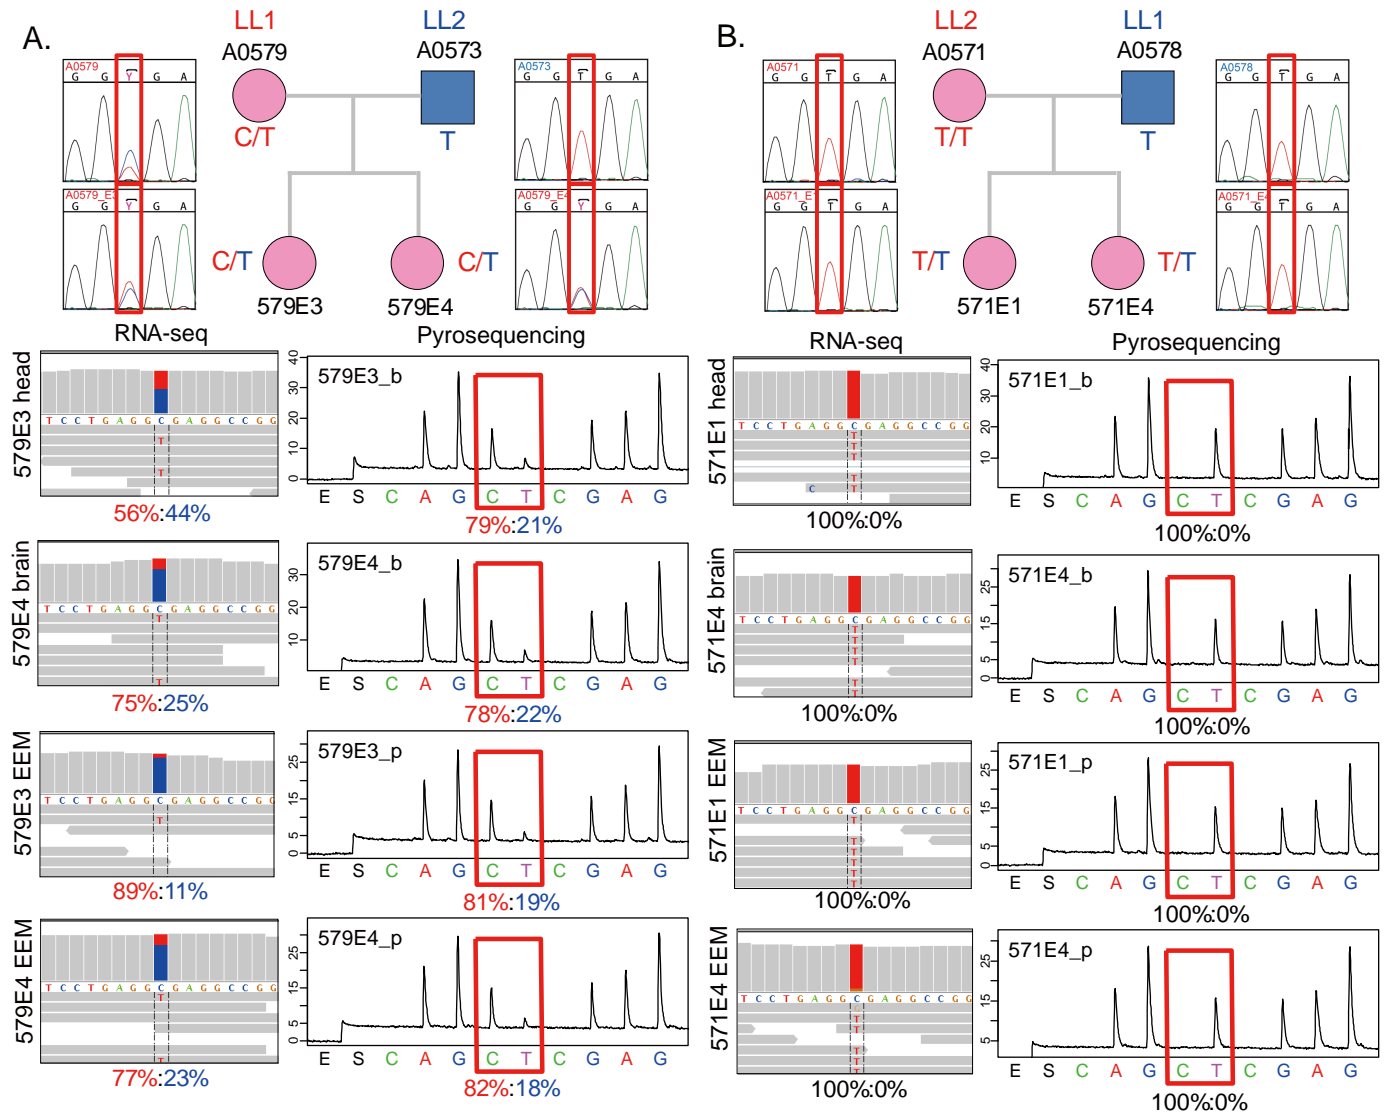

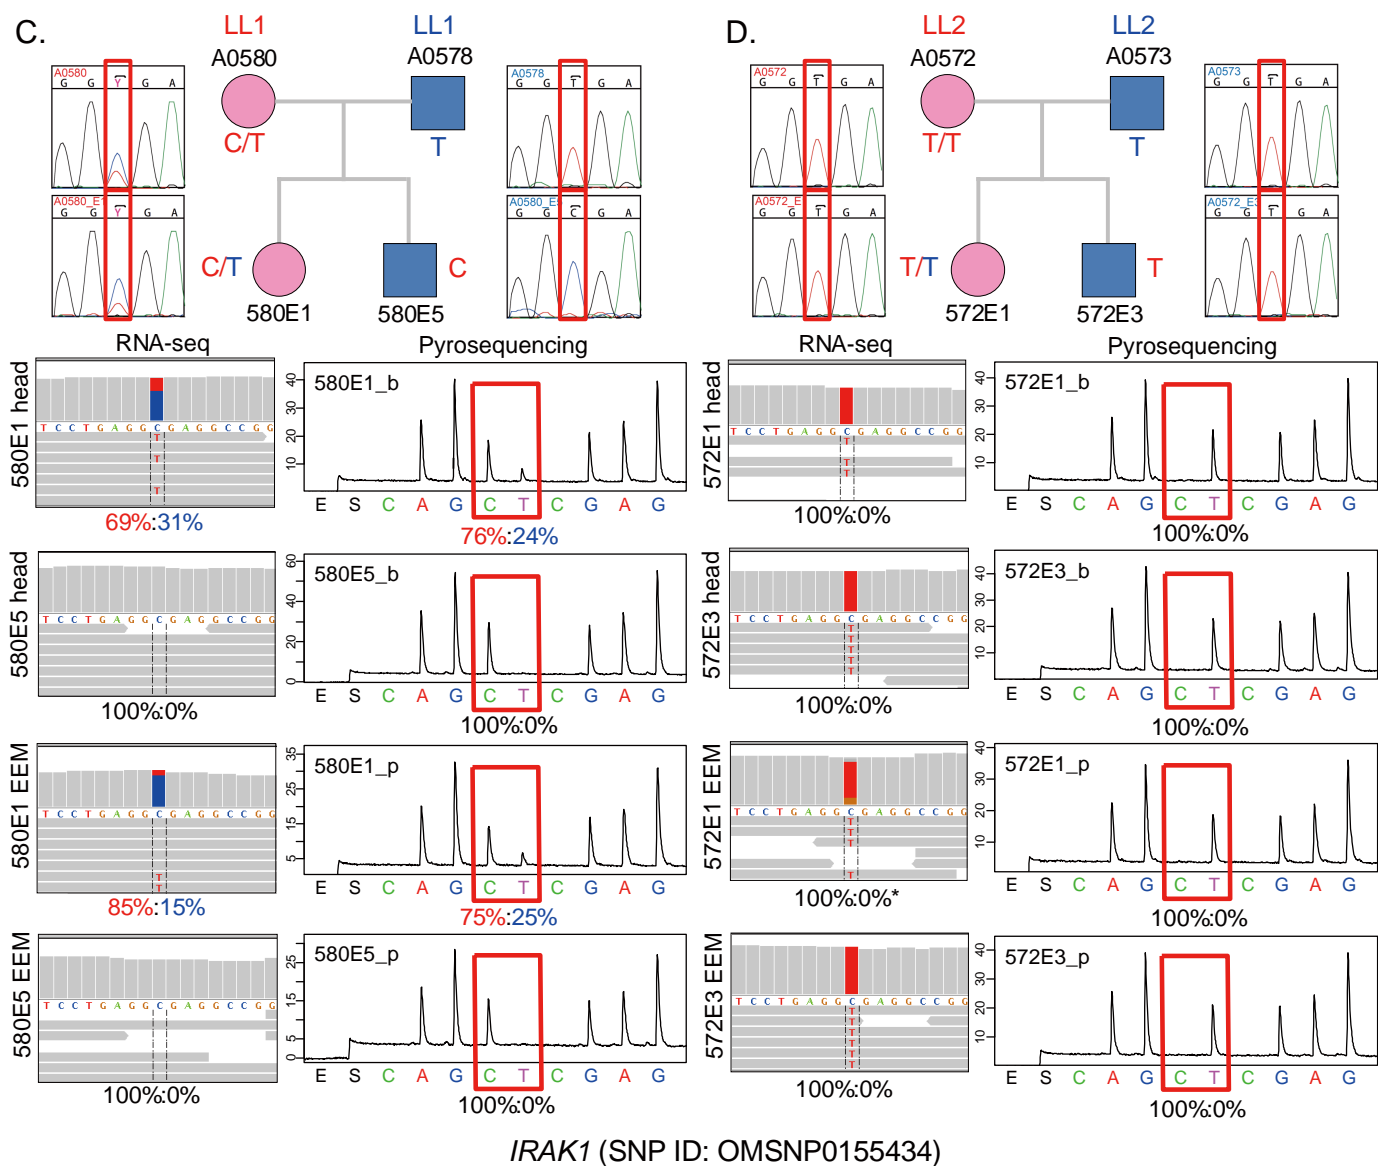

\*: There are two reads containing G allele at this SNP position caused by Illumina sequencing error (Q-score $\leq$ 2), and they were excluded from the analysis.

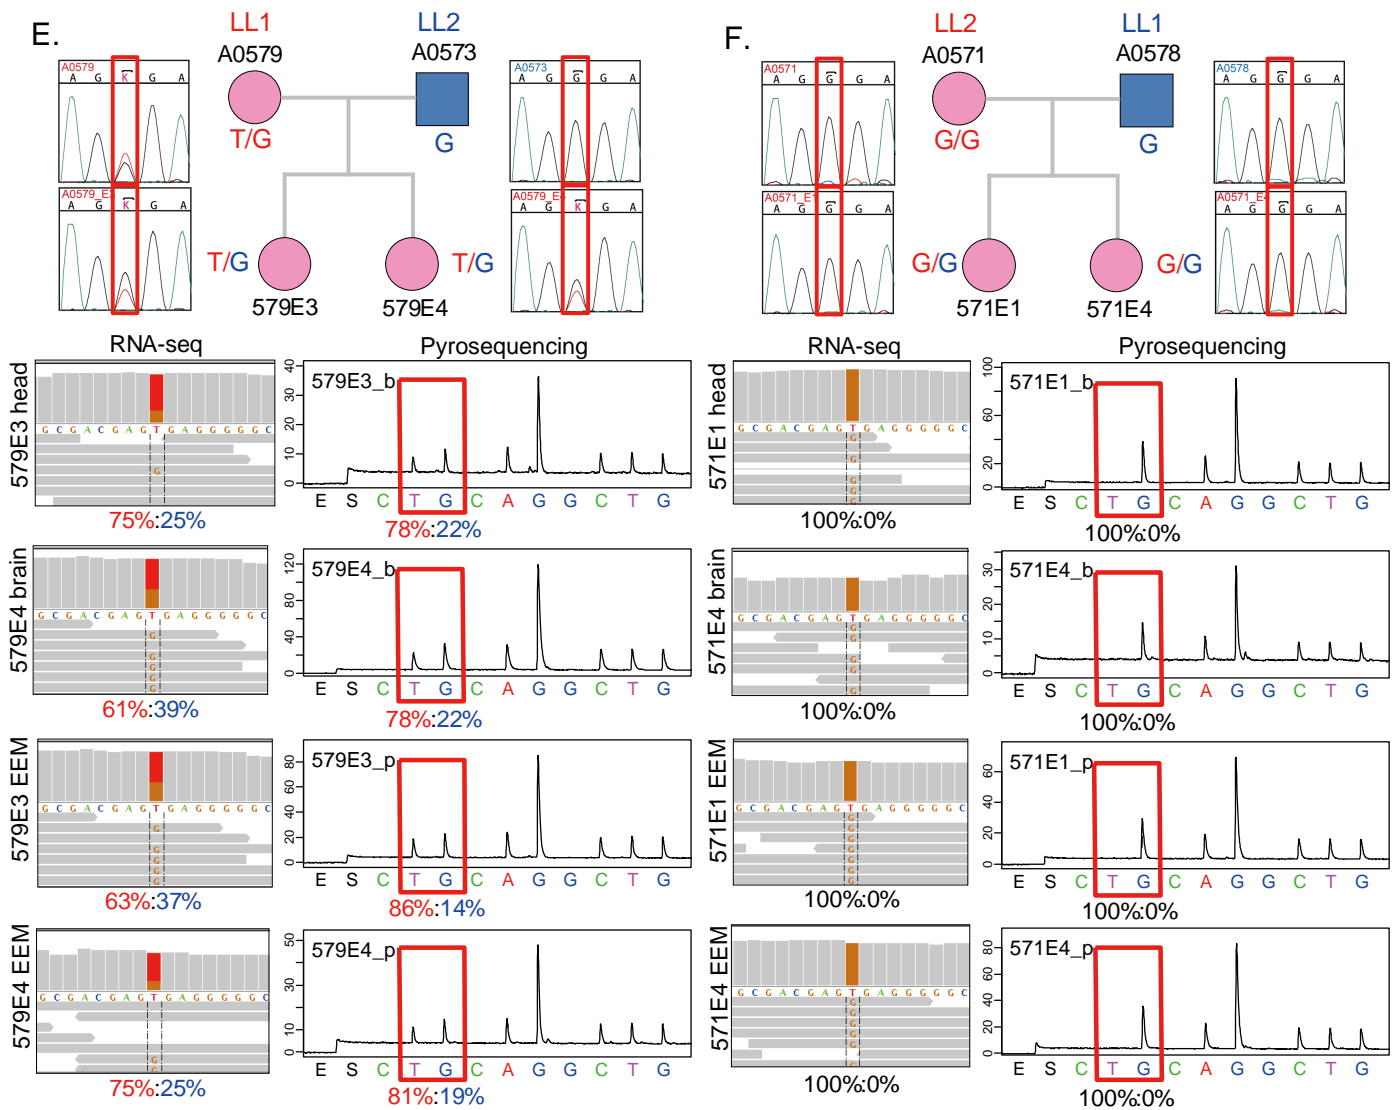

*IRAK1* (SNP ID: OMSNP0155433)

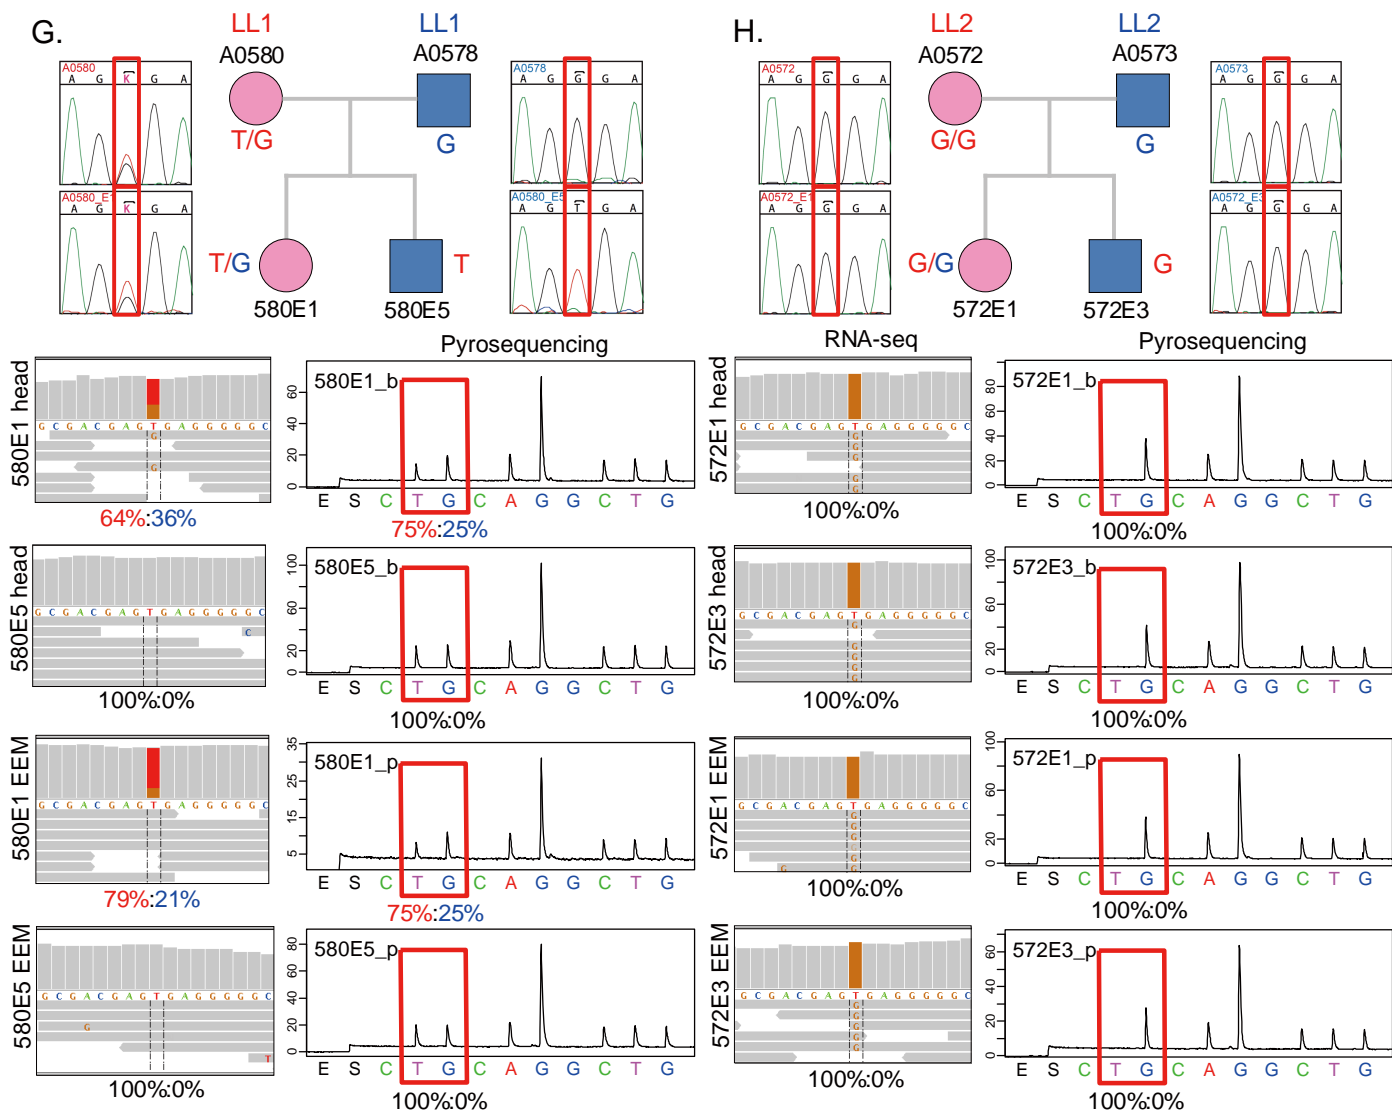

*IRAK1* (SNP ID: OMSNP0155433)

**Figure S16. RNA-seq, SNP genotyping and pyrosequencing verification results for escaper gene *FRMD7* in opossum fetal brain and EEM samples.**

(A)-(D). Results for SNP OMSNP0155979. (A). F1 cross of LL1 (mother) x LL2 (father). (B) Reciprocal F1 cross of LL2 (mother) x LL1 (father). (C). LL1 parental cross. (D). LL2 parental cross. (E)-(H). Results for SNP OMSNP0155980. (E). F1 cross of LL1 (mother) x LL2 (father). (F) Reciprocal F1 cross of LL2 (mother) x LL1 (father). (G). LL1 parental cross. (H). LL2 parental cross. From the Sanger sequencing genotyping results, two SNPs (OMSNP0155979 and OMSNP0155980, 57bp apart) are informative in four embryos (579E3, 579E4, 572E1 and 580E1). In brain/head and EEM tissues of all four individuals, biallelic expression was observed from both RNA-seq and allele-specific pyrosequencing verification, and the allelic expression percentages agreed well at the two SNP positions. Therefore, *FRMD7* is an escaper of imprinted XCI in both tissues. The target sequence for pyrosequencing is (C/T)GAGTTCGA at SNP OMSNP0155979 (on the minus strand). The target sequence for pyrosequencing is ATC(A/G)GAGCCCA at SNP OMSNP0155980 (on the minus strand).

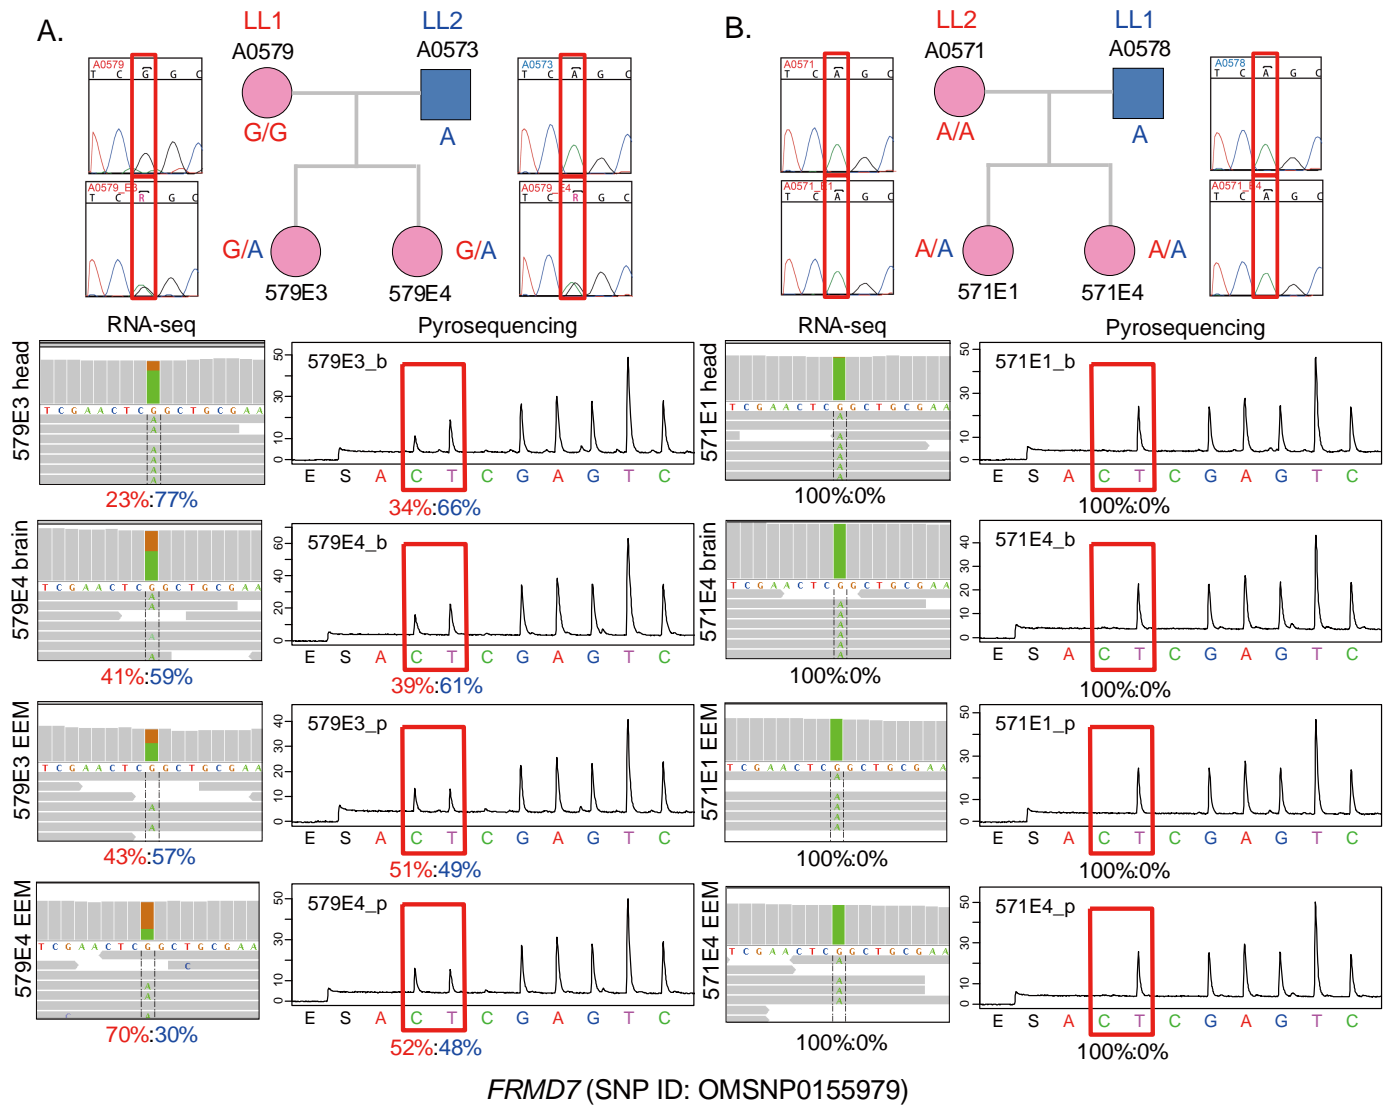

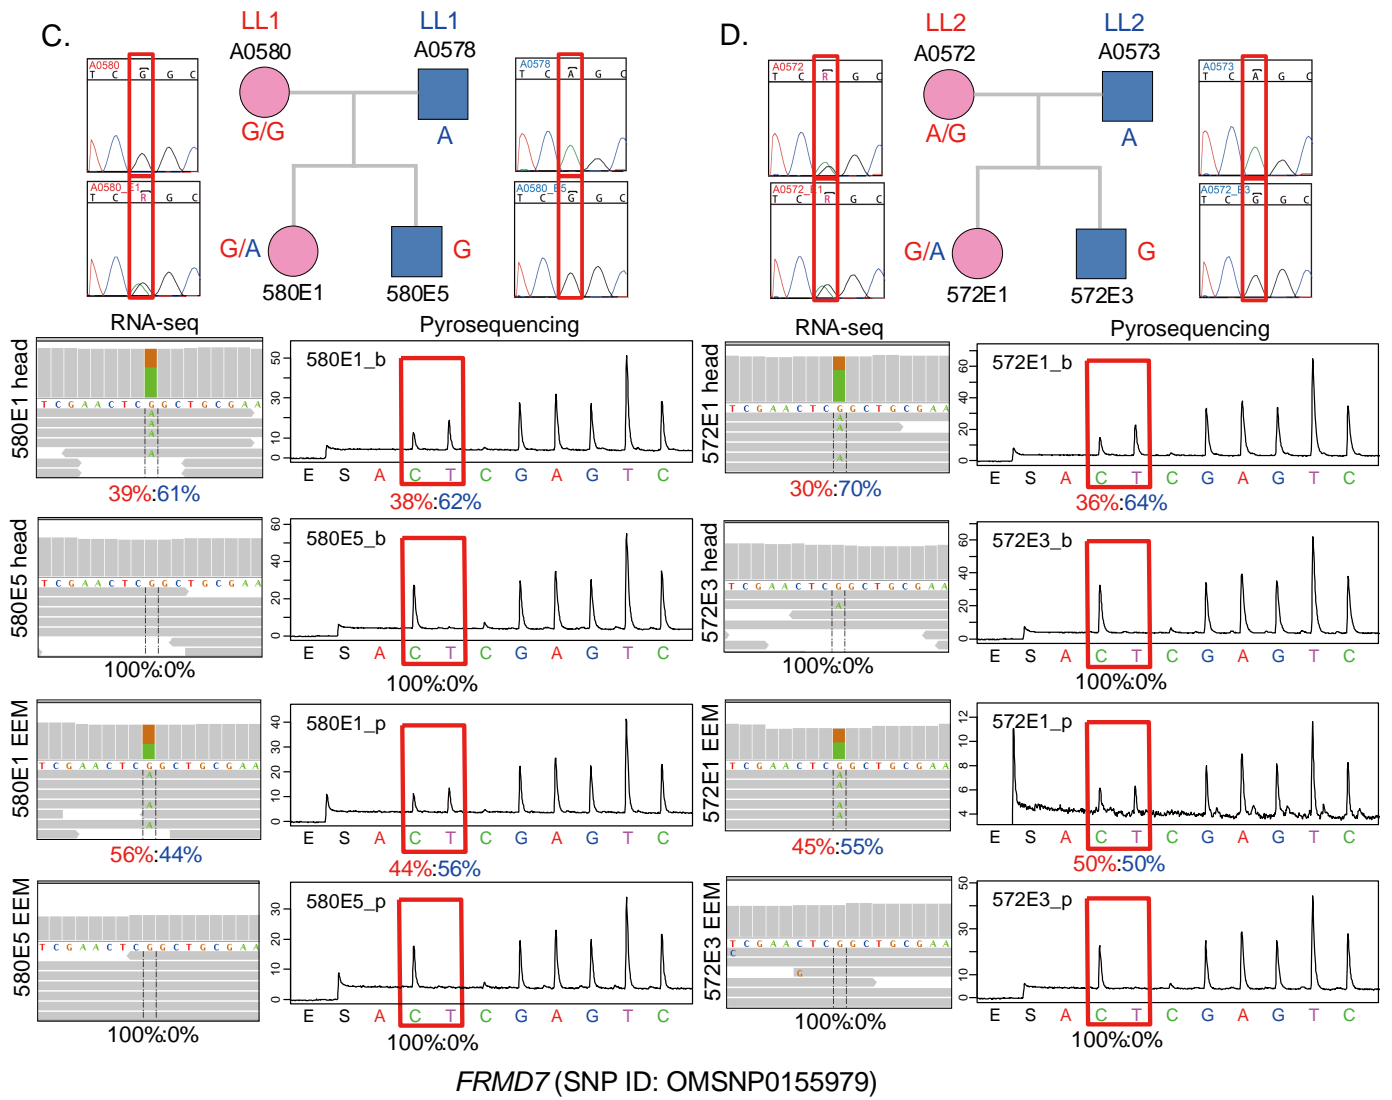

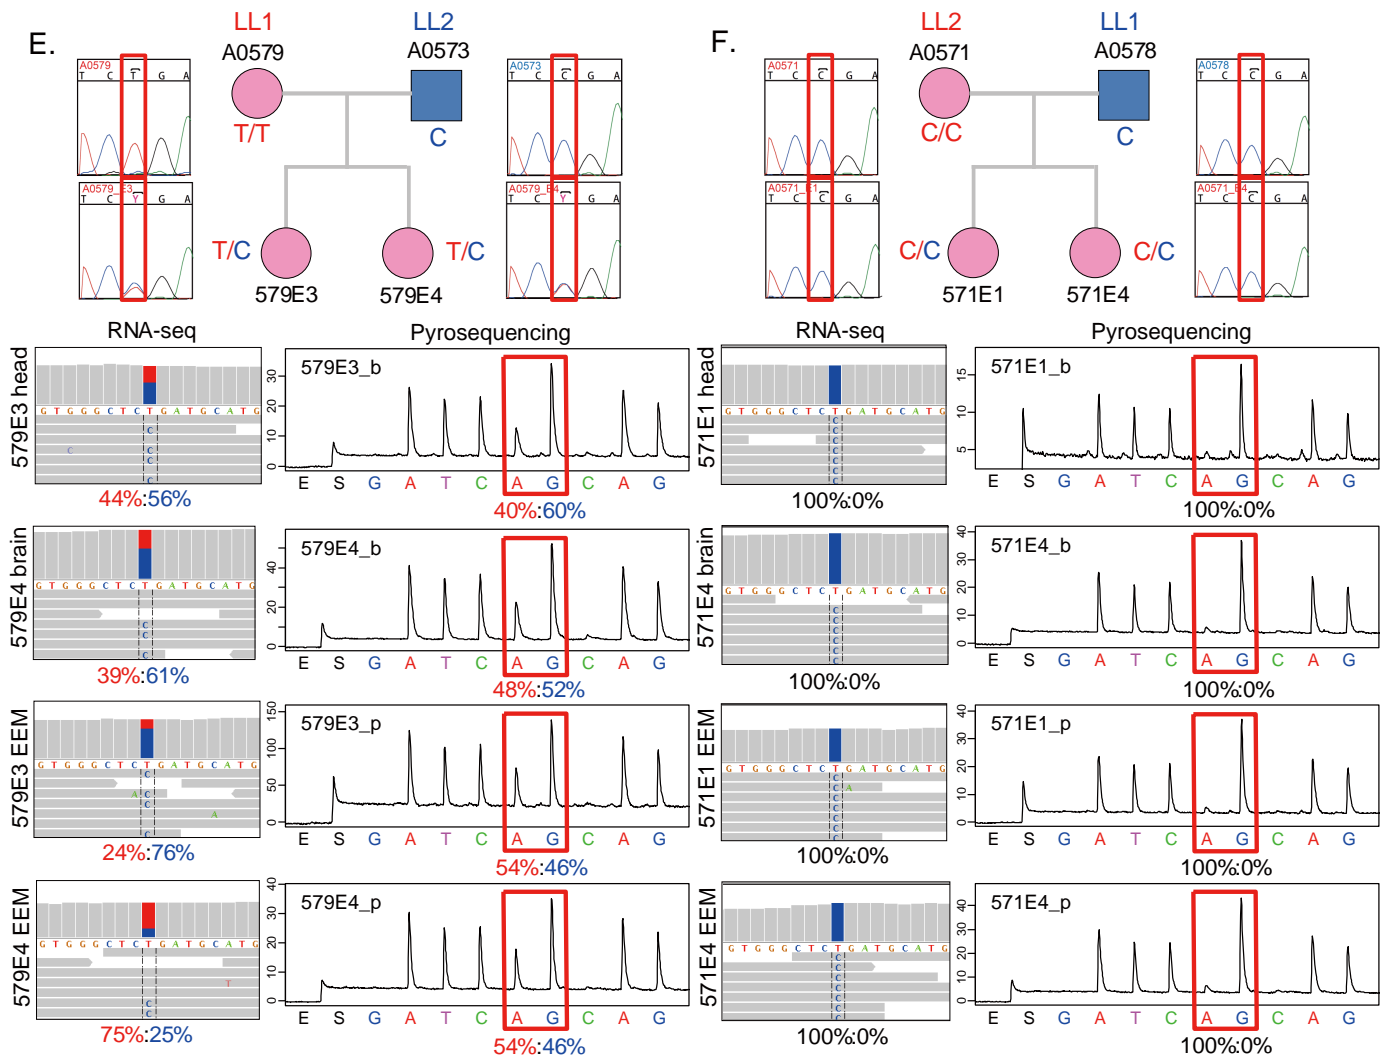

FRMD7 (SNP ID: OMSNP0155980)

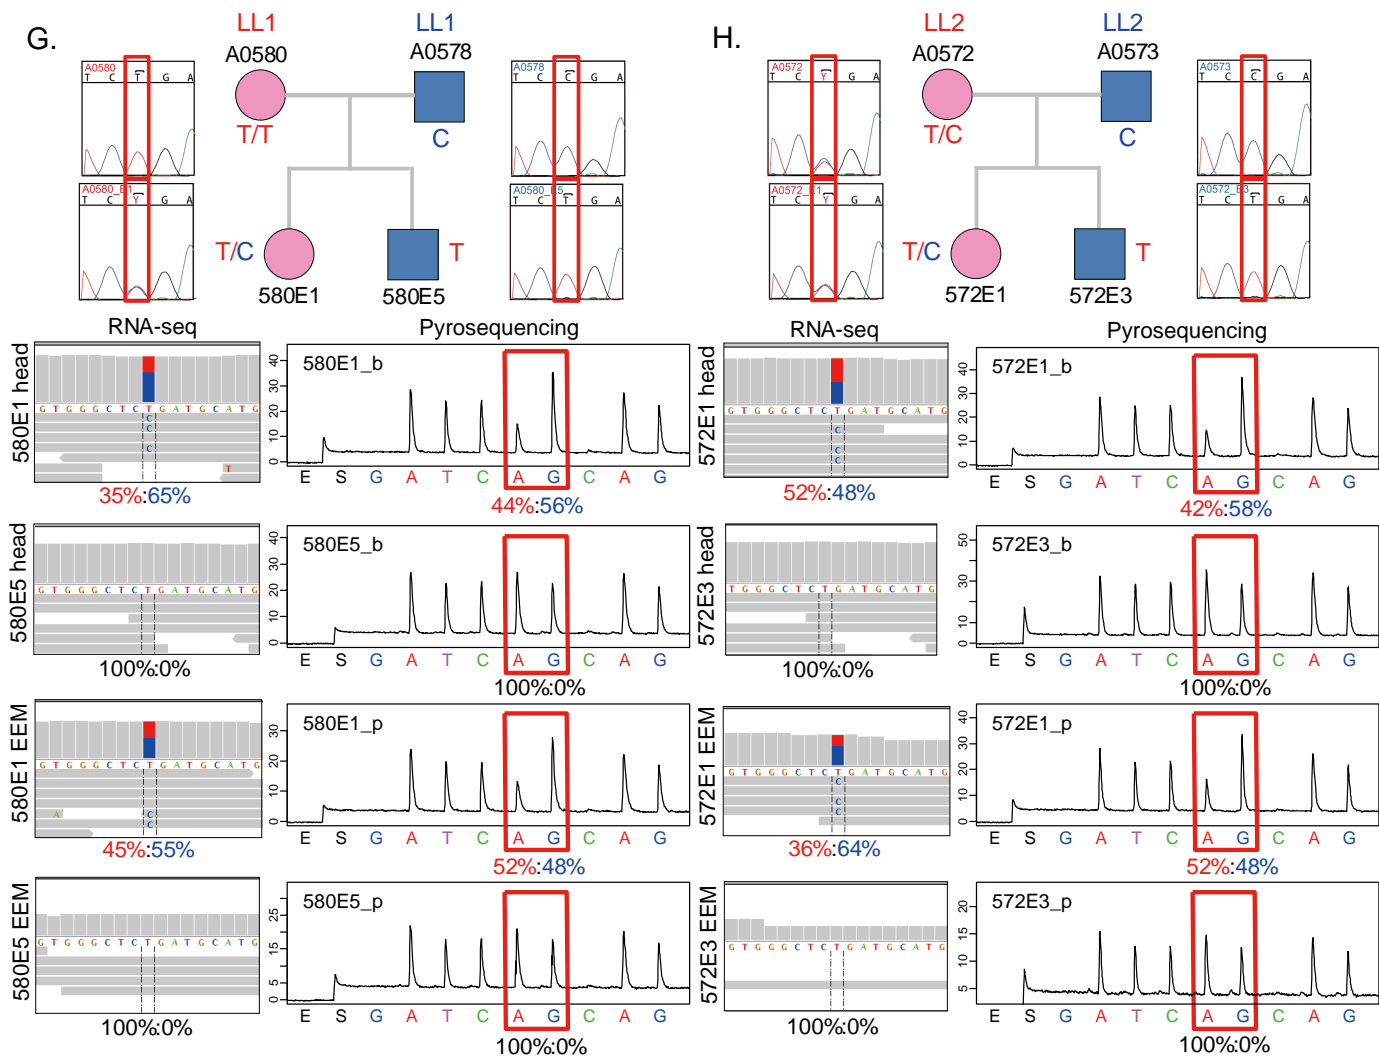

FRMD7 (SNP ID: OMSNP0155980)



**Figure S17. RNA-seq, SNP genotyping and pyrosequencing verification results for escaper gene *NONO* in opossum fetal brain and EEM samples.**

(A). F1 cross of LL1 (mother) x LL2 (father). (B) Reciprocal F1 cross of LL2 (mother) x LL1 (father). (C). LL1 parental cross. (D). LL2 parental cross. From the Sanger sequencing genotyping results, the SNP (OMSNP0156865) is informative in five embryos (579E3, 579E4, 571E1, 571E4 and 580E1). In brain/head and EEM tissues of all five individuals, biallelic expression was observed from both RNA-seq and allele-specific pyrosequencing verification. Therefore, *NONO* is an escaper of imprinted XCI in both tissues. The target sequence for pyrosequencing is TTC(C/T)TCTTCCTC (on the minus strand). The Sanger sequencing traces were not shown here because an indel polymorphism in the amplicon shifted the traces, but the genotypes could be determined by the software.

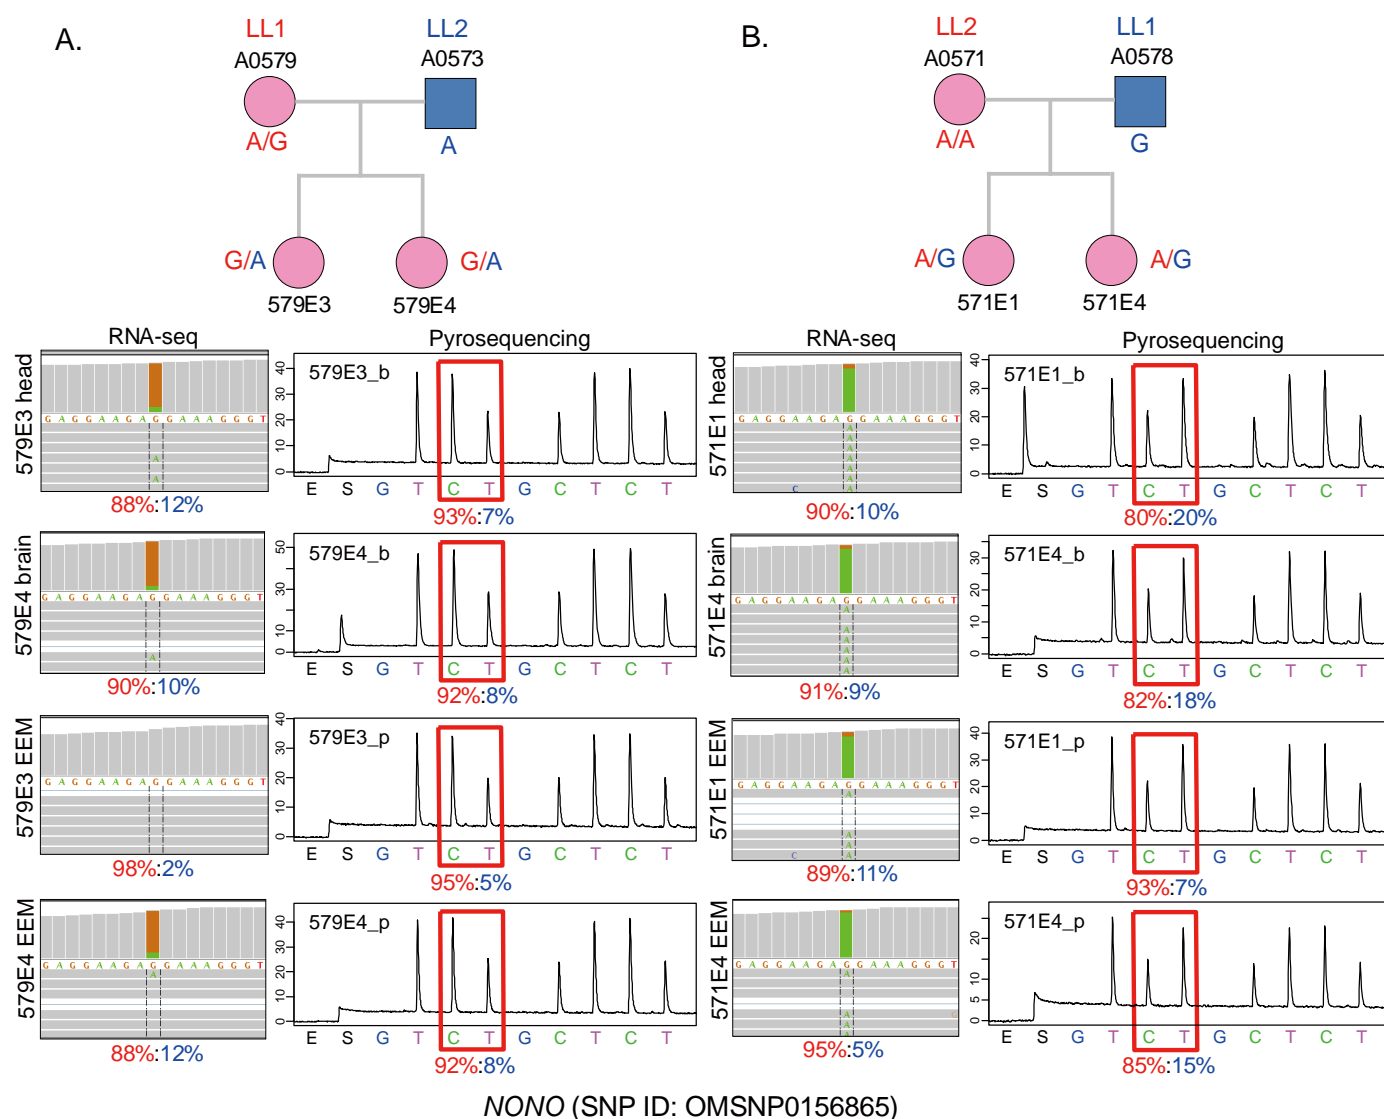

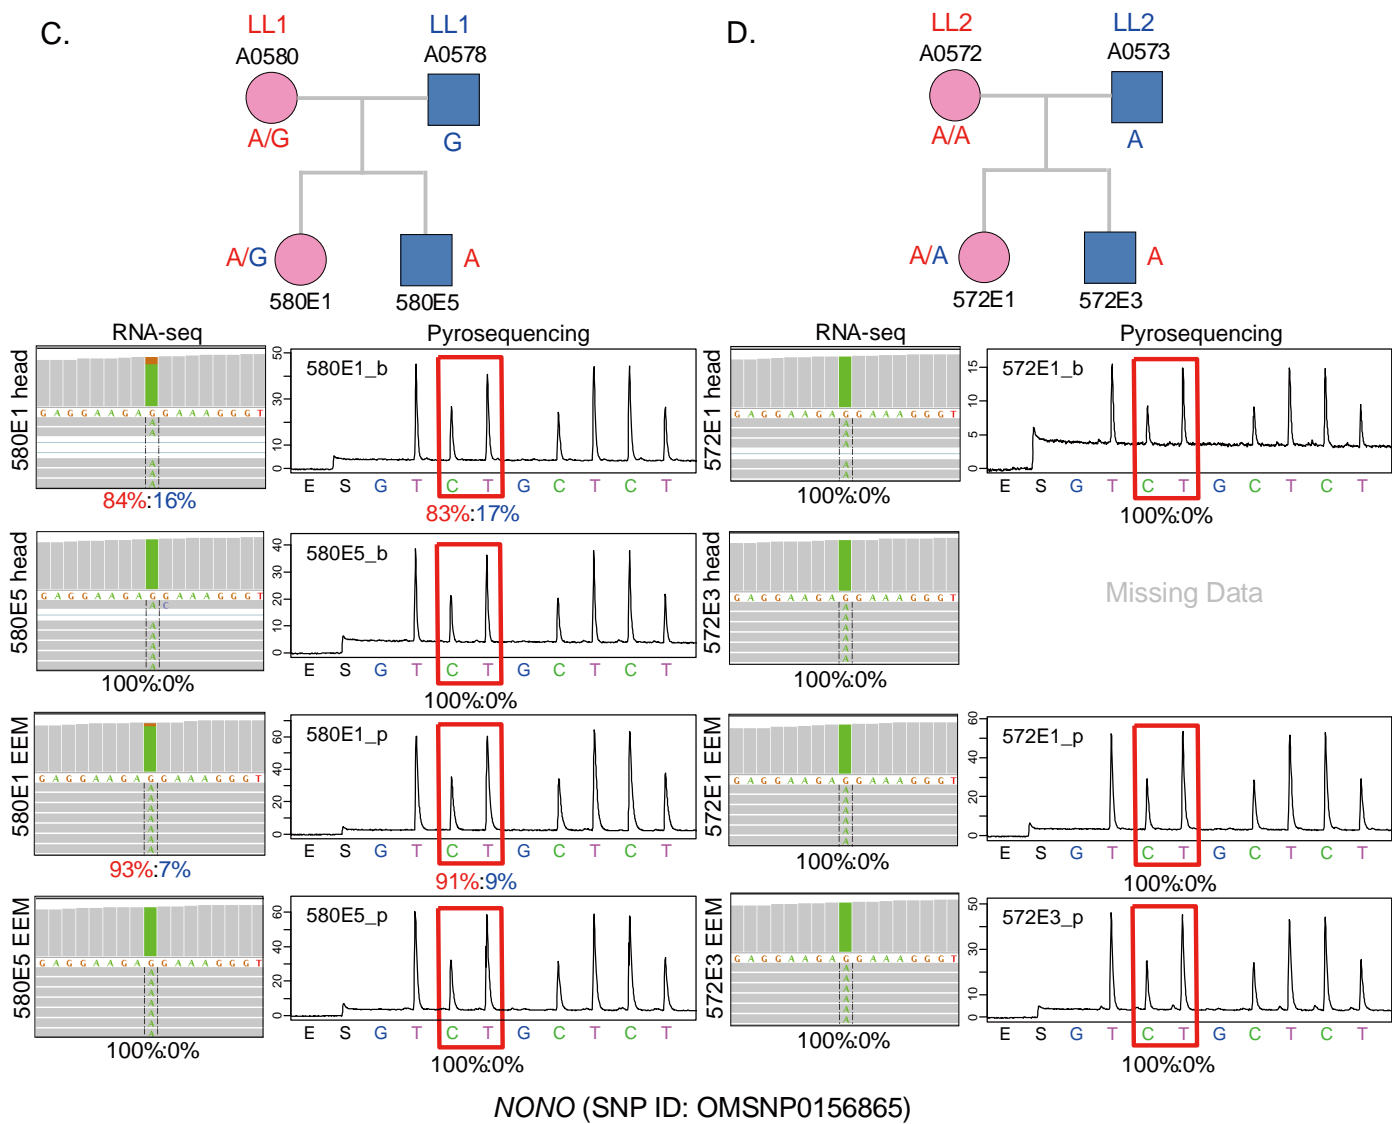

**Figure S18. RNA-seq, SNP genotyping and pyrosequencing verification results for escaper gene *DKC1* in opossum fetal brain and EEM samples.**

(A). F1 cross of LL1 (mother) x LL2 (father). (B) Reciprocal F1 cross of LL2 (mother) x LL1 (father). (C). LL1 parental cross. (D). LL2 parental cross. From the Sanger sequencing genotyping results, the SNP (OMSNP0154969) is informative in three embryos (579E3, 579E4 and 580E1). In brain/head and EEM tissues of all three individuals, biallelic expression was observed from both RNA-seq and allele-specific pyrosequencing verification. Therefore, *DKC1* is an escaper of imprinted XCI in both tissues. The target sequence for pyrosequencing is (C/T)ATGGGGGAGAAG.

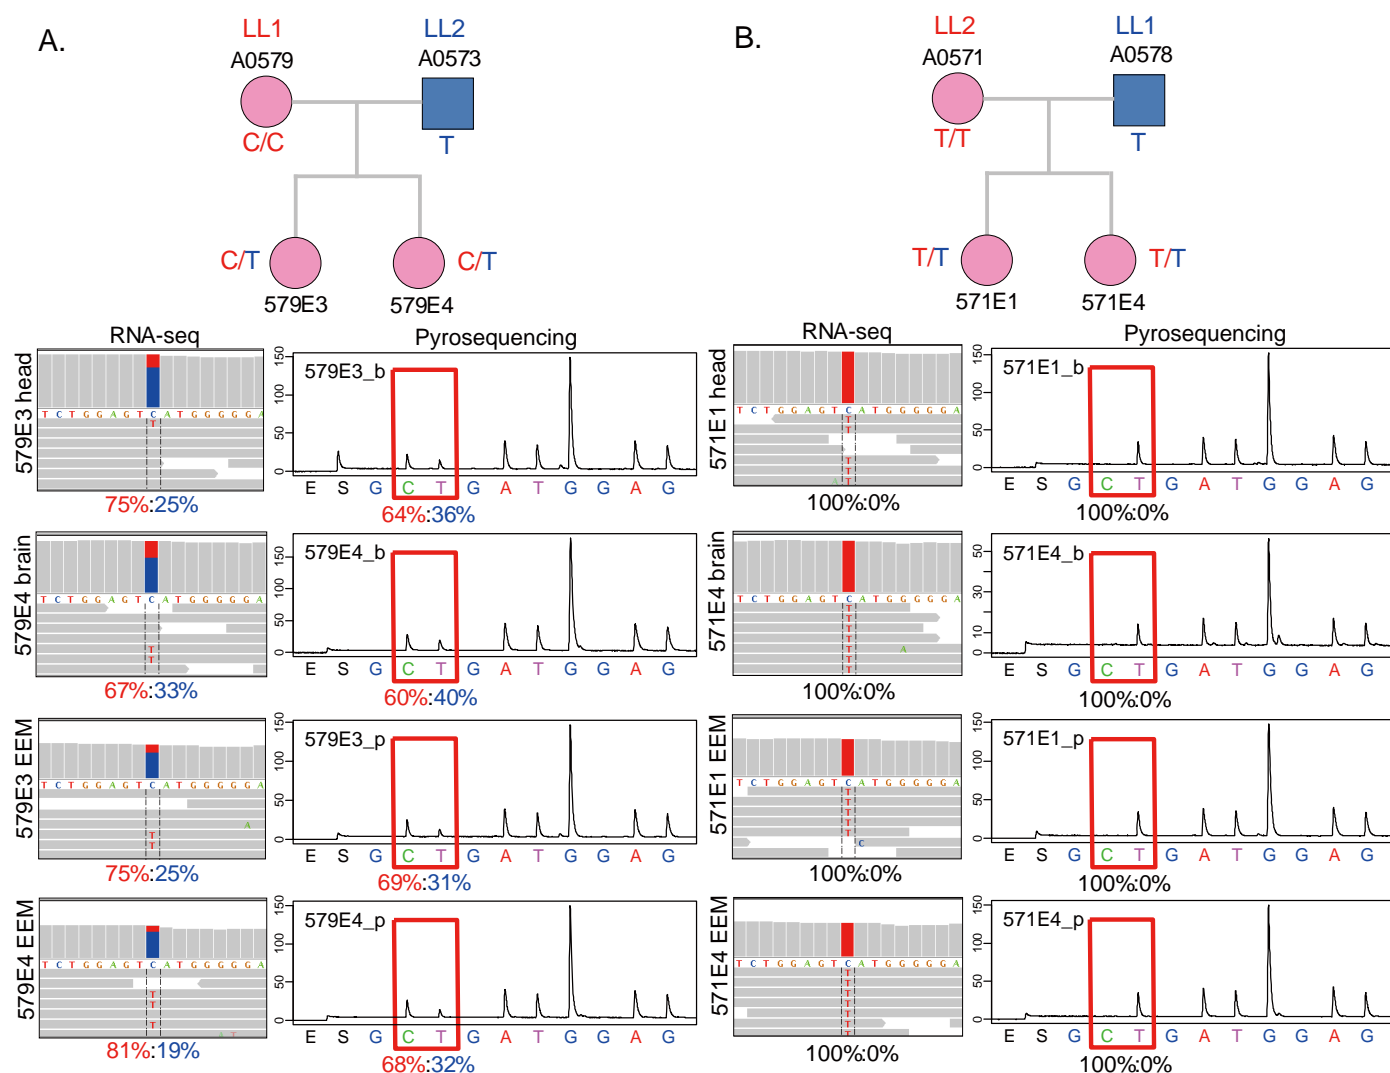

*DKC1* (SNP ID: OMSN0154969)

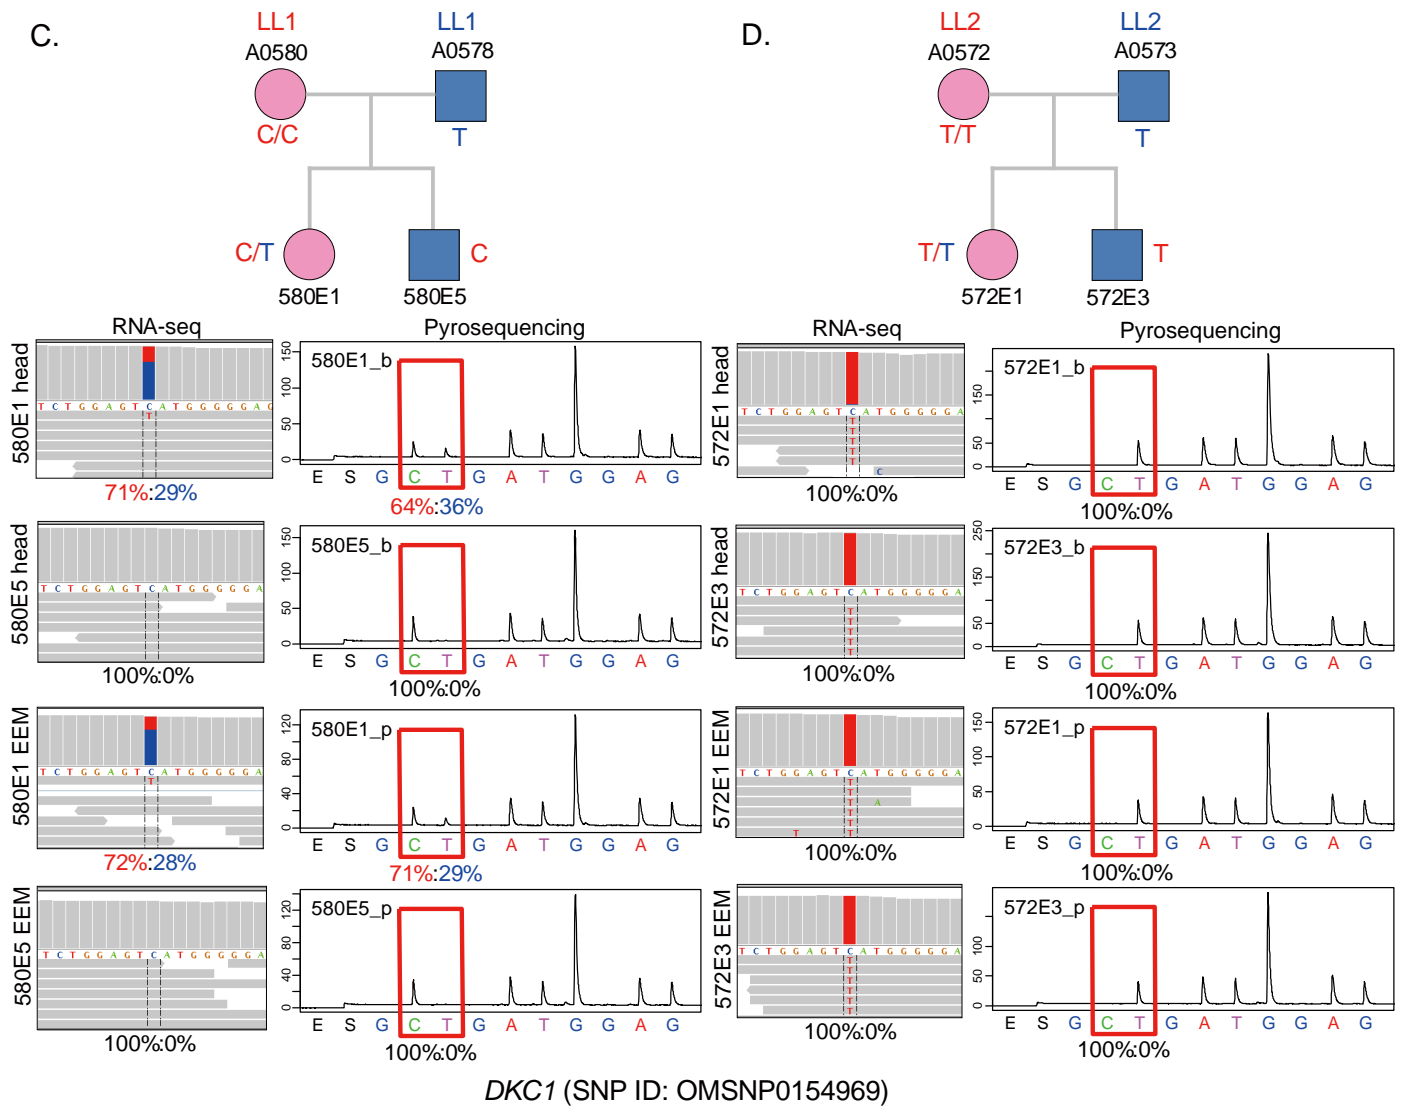

**Figure S19. RNA-seq, SNP genotyping and pyrosequencing verification results for escaper gene *MTMR1* in opossum fetal brain and EEM samples.**

(A). F1 cross of LL1 (mother) x LL2 (father). (B) Reciprocal F1 cross of LL2 (mother) x LL1 (father). (C). LL1 parental cross. (D). LL2 parental cross. From the Sanger sequencing genotyping results, the SNP (OMSNP0156120) is informative in four embryos (579E3, 579E4, 571E1 and 571E4). In brain/head and EEM tissues of all four individuals, biallelic expression was observed from both RNA-seq and allele-specific pyrosequencing verification. Therefore, *MTMR1* is an escaper of imprinted XCI in both tissues. The target sequence for pyrosequencing is (T/C)GGAGTTTACA.

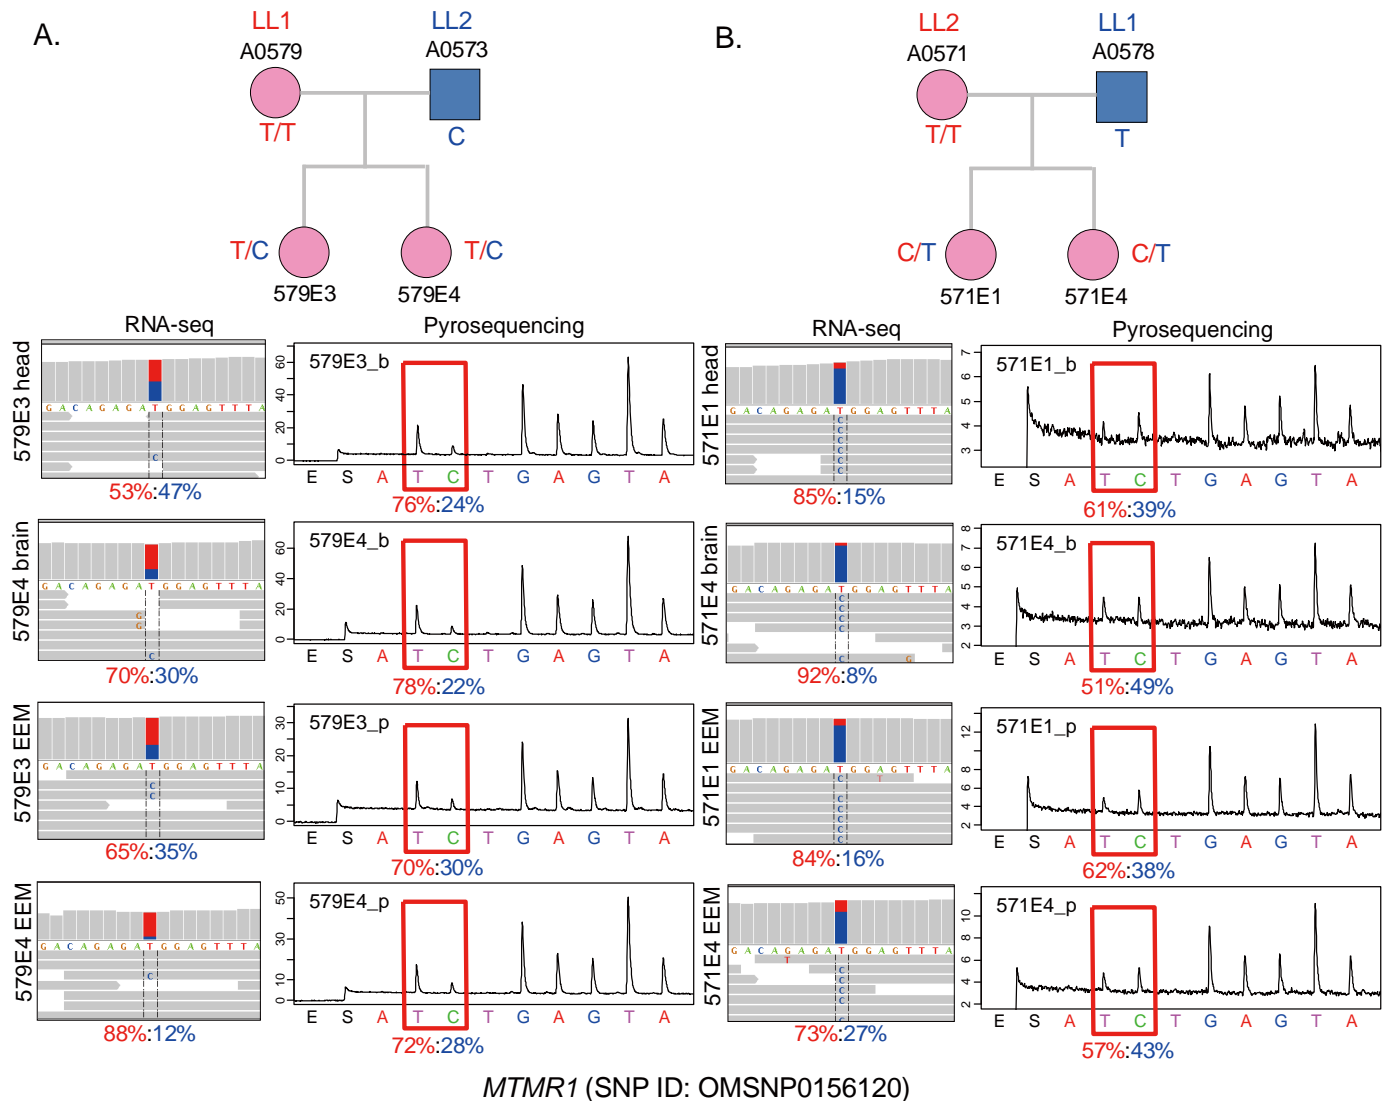

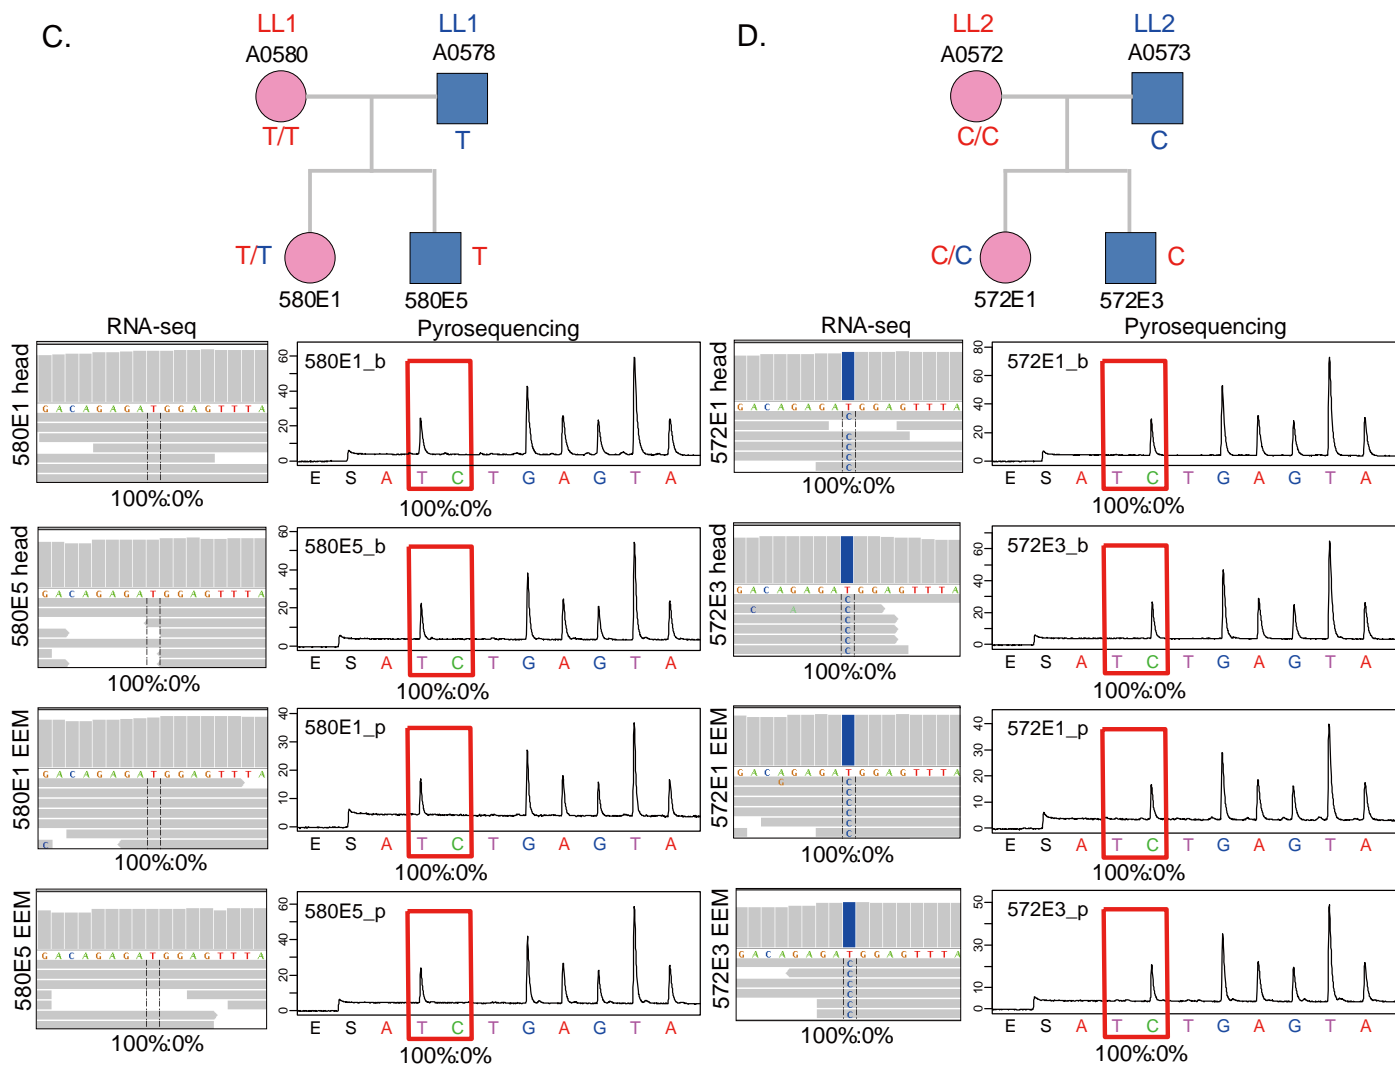

MTMR1 (SNP ID: OMSNP0156120)

**Figure S20. RNA-seq and pyrosequencing verification results for escaper gene *RPL10* in opossum fetal brain and EEM samples.**

(A). F1 cross of LL1 (mother) x LL2 (father). (B) Reciprocal F1 cross of LL2 (mother) x LL1 (father). (C). LL1 parental cross. (D). LL2 parental cross. The SNP (chrX\_3167321) is informative in two embryos (571E1 and 571E4). In brain/head and EEM tissues of both individuals, biallelic expression was observed from both RNA-seq and allele-specific pyrosequencing verification. Therefore, *RTL10* is an escaper of imprinted XCI in both tissues. The target sequence for pyrosequencing is (C/T)CGCCAAAAGCGG. The SNP genotypes were called from the RNA-seq data and inferred based on the pedigree information. The parental transmission directions were unambiguously determined.

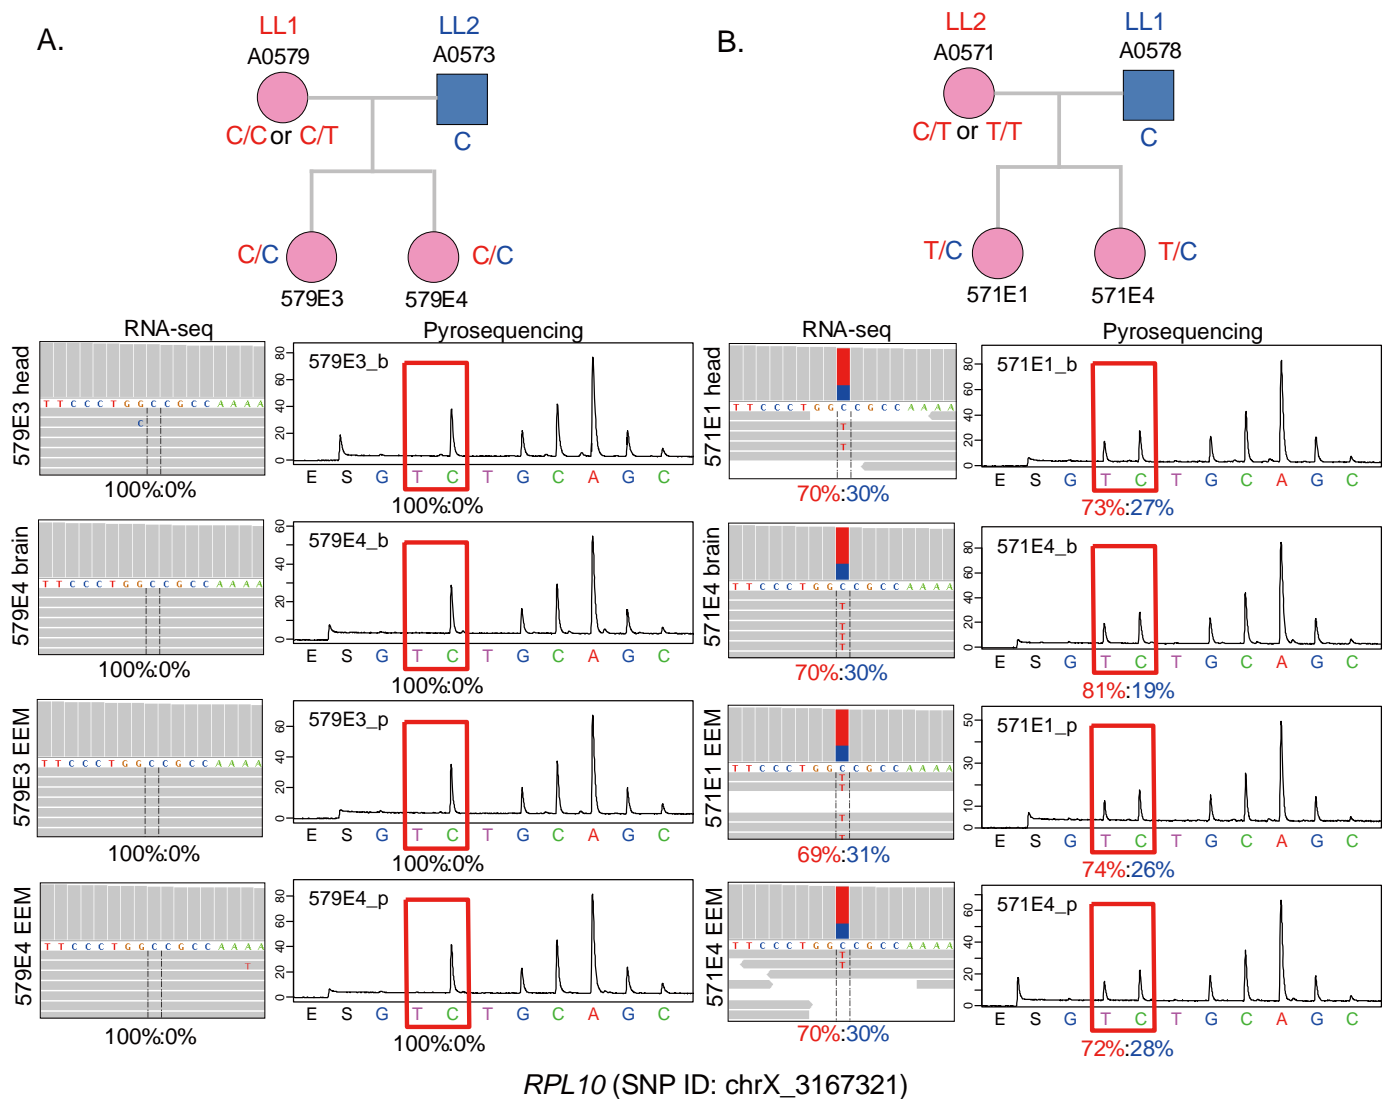





**Figure S21. RNA-seq and pyrosequencing verification results for escaper gene *IKBK*G in opossum fetal brain and EEM samples.**

(A). F1 cross of LL1 (mother) x LL2 (father). (B) Reciprocal F1 cross of LL2 (mother) x LL1 (father). (C). LL1 parental cross. (D). LL2 parental cross. The SNP (OMSNP0154954) is informative in three embryos (579E3, 579E4 and 580E1). In brain/head and EEM tissues of all three individuals, biallelic expression was observed from both RNA-seq and allele-specific pyrosequencing verification. Therefore, *IKBK*G is an escaper of imprinted XCI in both tissues. The target sequence for pyrosequencing is (A/G)TGGTAGGCT (on the minus strand). Pyrosequencing was not performed for two of the four crosses because they are not informative (B and D). The SNP genotypes were called from the RNA-seq data and inferred based on the pedigree information. The parental transmission directions were unambiguously determined.

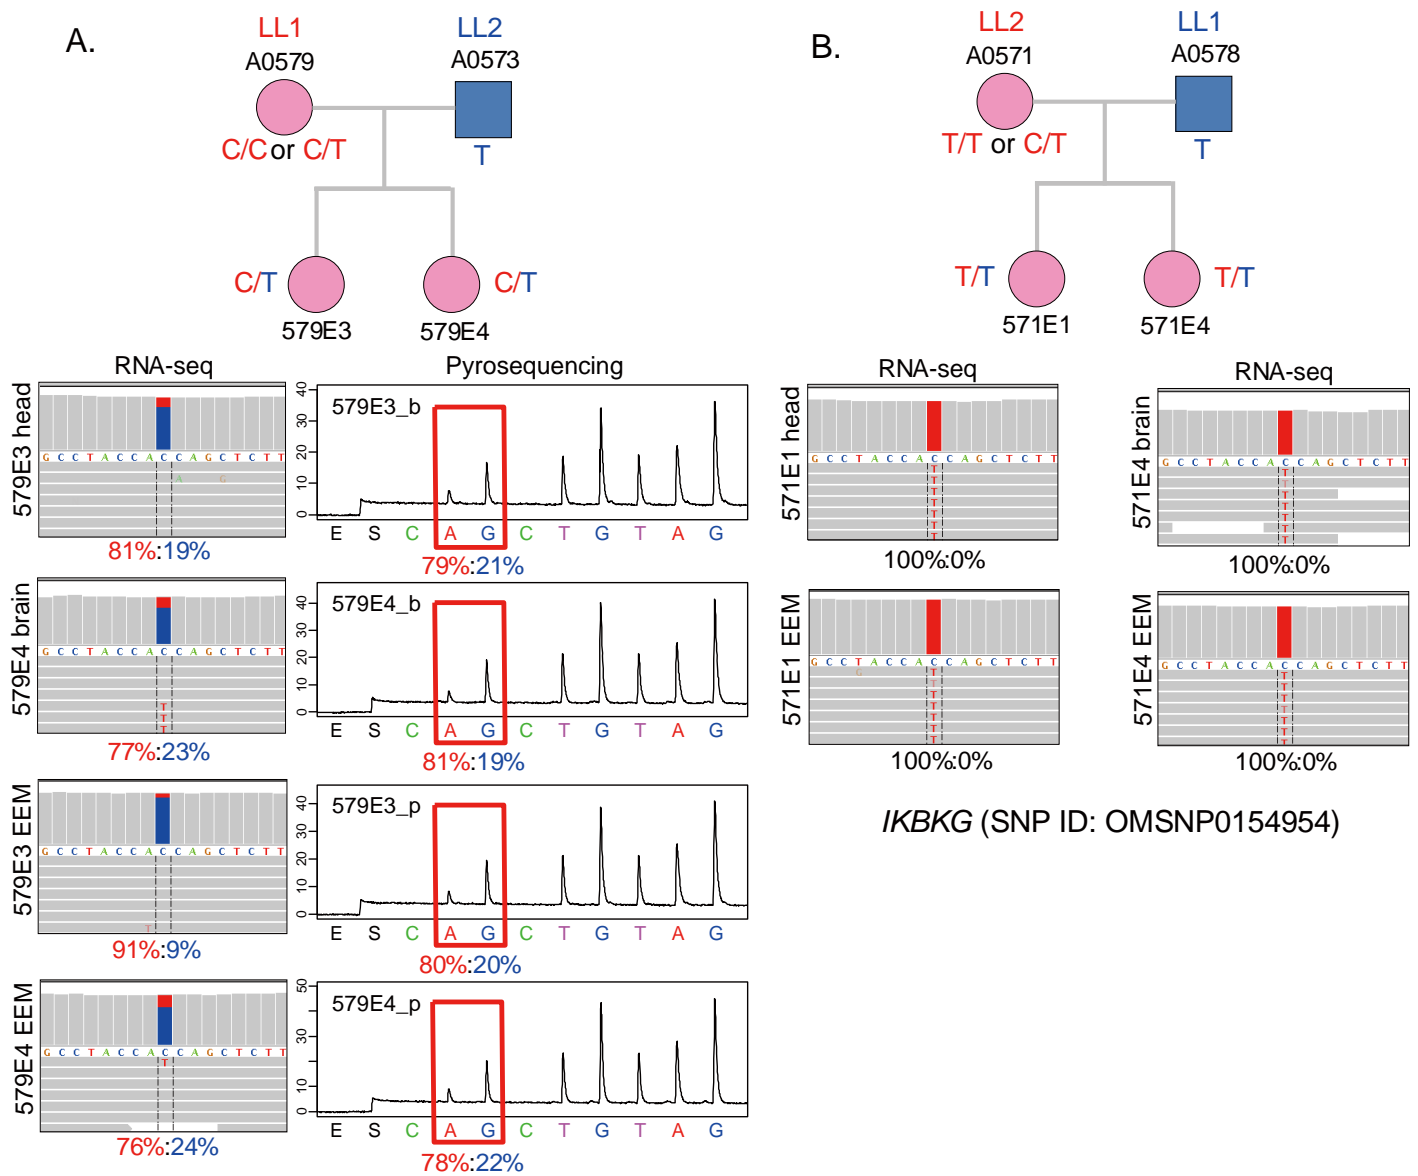

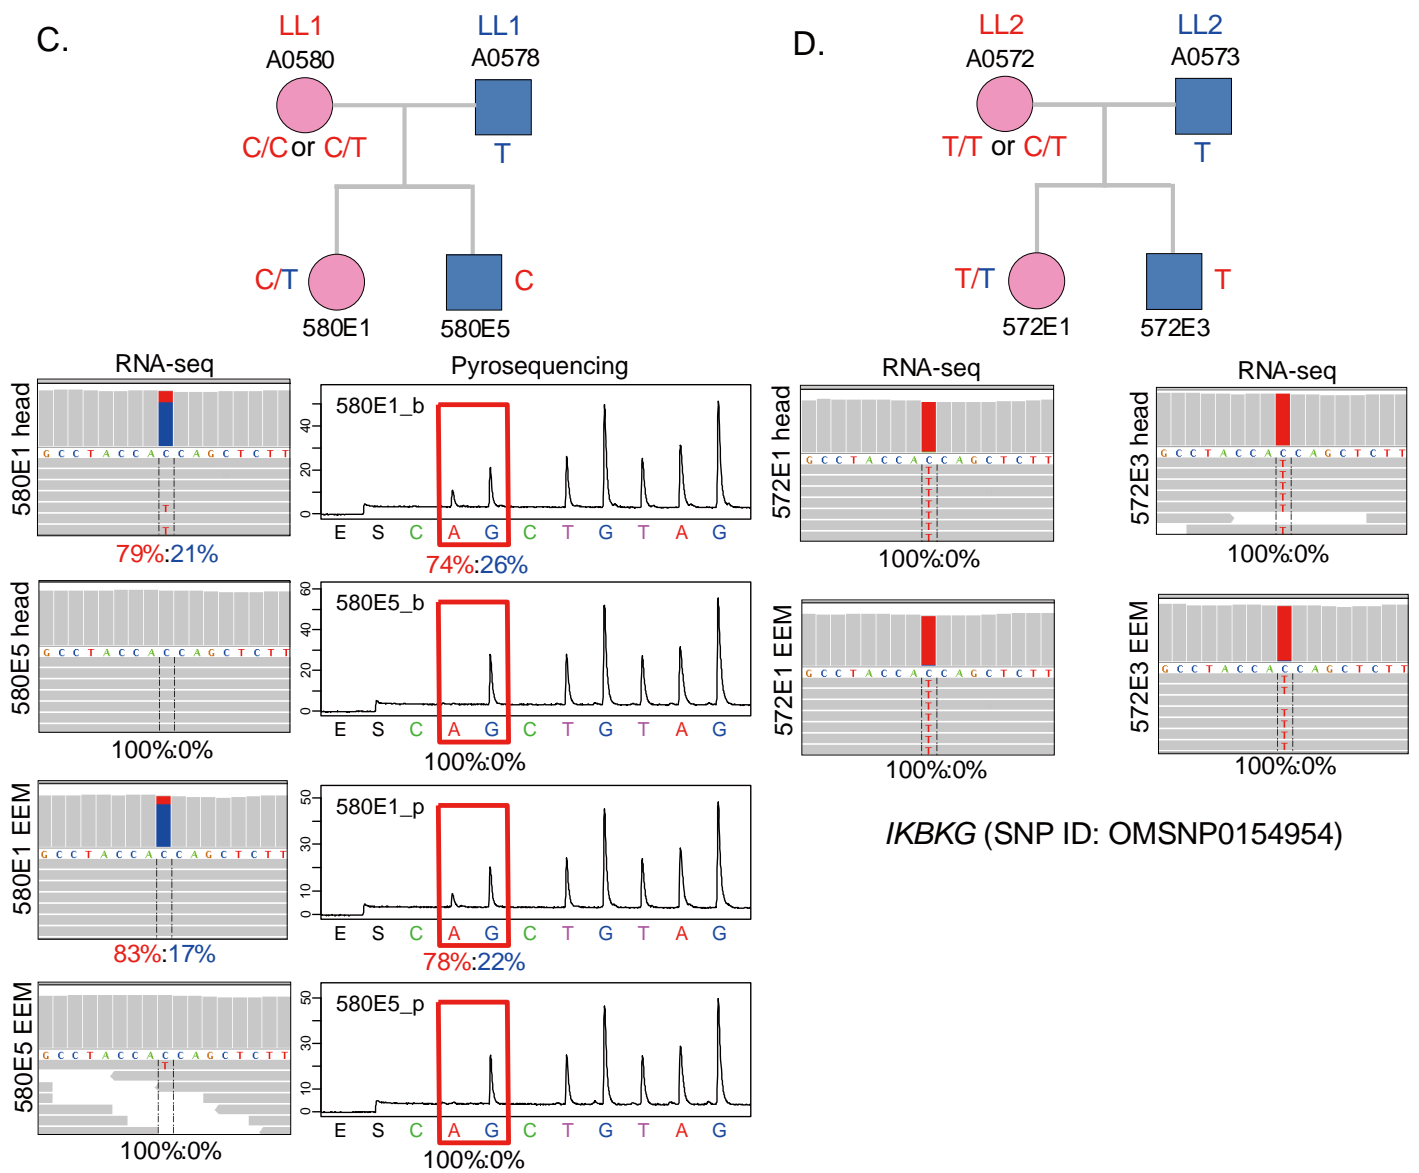

**Figure S22. RNA-seq and pyrosequencing verification results for escaper gene *FAM122B* in opossum fetal brain and EEM samples.**

(A). F1 cross of LL1 (mother) x LL2 (father). (B) Reciprocal F1 cross of LL2 (mother) x LL1 (father). (C). LL1 parental cross. (D). LL2 parental cross. The SNP (OMSNP0156061) is informative in four embryos (579E3, 579E4, 571E1 and 571E4). In brain/head and EEM tissues of all four individuals, biallelic expression was observed from both RNA-seq and allele-specific pyrosequencing verification. Therefore, *FAM122B* is an escaper of imprinted XCI in both tissues. The target sequence for pyrosequencing is (A/C)GGGTGGCCGCG (on the minus strand). The SNP genotypes were called from the RNA-seq data and inferred based on the pedigree information. The parental transmission directions were unambiguously determined. This SNP is located in an alternatively spliced exon.

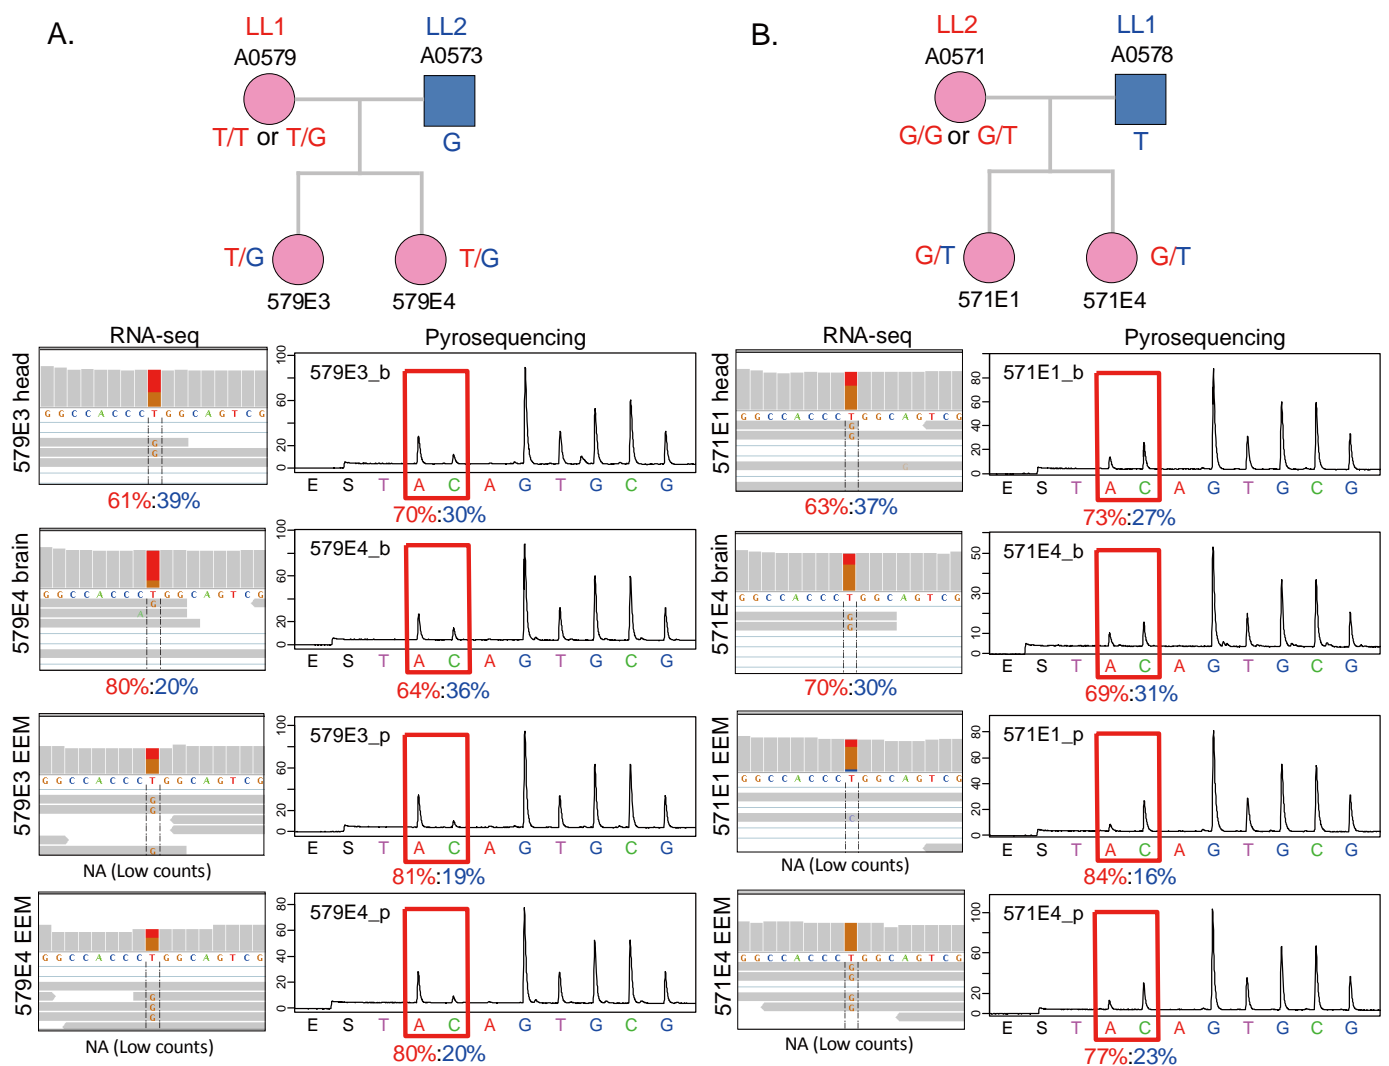

*FAM122B* (SNP ID: OMSNP0156061)



**Figure S23. RNA-seq and pyrosequencing verification results for escaper gene *PLXNA3* in opossum fetal brain and EEM samples.**

(A). F1 cross of LL1 (mother) x LL2 (father). (B) Reciprocal F1 cross of LL2 (mother) x LL1 (father). (C). LL1 parental cross. (D). LL2 parental cross. The SNP (OMSNP0154900) is informative in two embryos (571E1 and 571E4). In brain/head and EEM tissues of both individuals, biallelic expression was observed from both RNA-seq and allele-specific pyrosequencing verification. Therefore, *PLXNA3* is an escaper of imprinted XCI in both tissues. The target sequence for pyrosequencing is CCG(C/T)AGCTTCT (on the minus strand). The SNP genotypes were called from the RNA-seq data and inferred based on the pedigree information. The parental transmission directions were unambiguously determined.

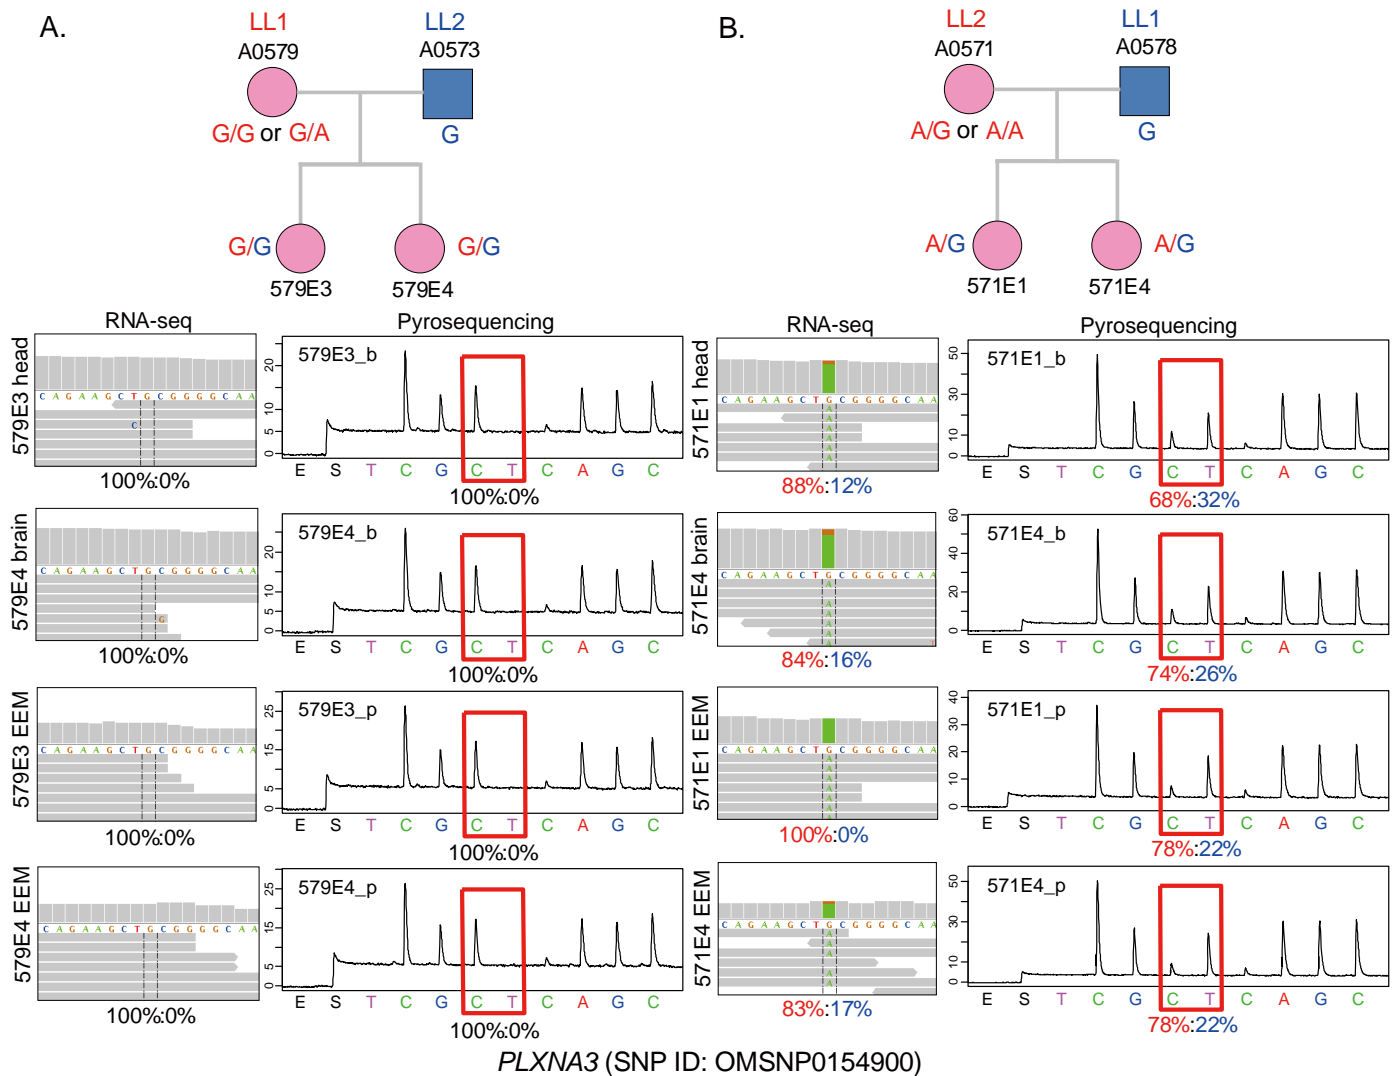

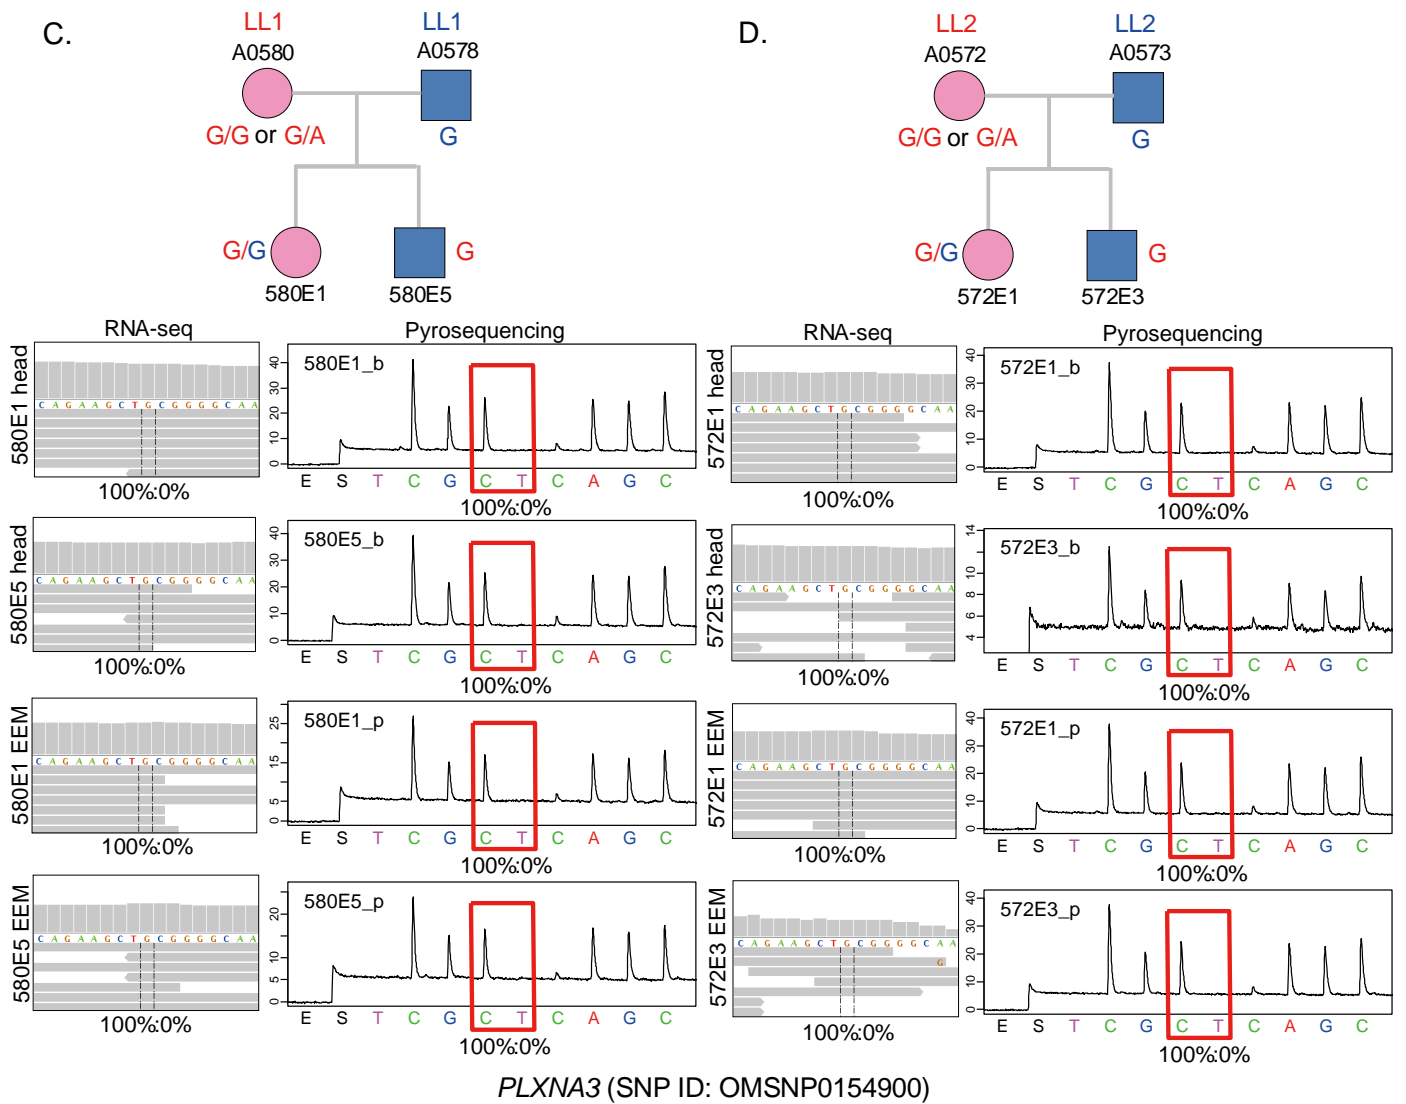

**Figure S24. RNA-seq and pyrosequencing verification results for escaper gene *NUP62* in opossum fetal brain and EEM samples.**

(A). F1 cross of LL1 (mother) x LL2 (father). (B) Reciprocal F1 cross of LL2 (mother) x LL1 (father). (C). LL1 parental cross. (D). LL2 parental cross. The SNP (OMSNP0155301) is informative in three embryos (579E3, 579E4 and 580E1). In brain/head and EEM tissues of all three individuals, biallelic expression was observed from both RNA-seq and allele-specific pyrosequencing verification. Therefore, *NUP62* is an escaper of imprinted XCI in both tissues. The target sequence for pyrosequencing is C(C/T)ACTGGATC. Pyrosequencing was not performed for two of the four crosses because they are not informative (B and D). The SNP genotypes were called from the RNA-seq data and inferred based on the pedigree information. The parental transmission directions were unambiguously determined.

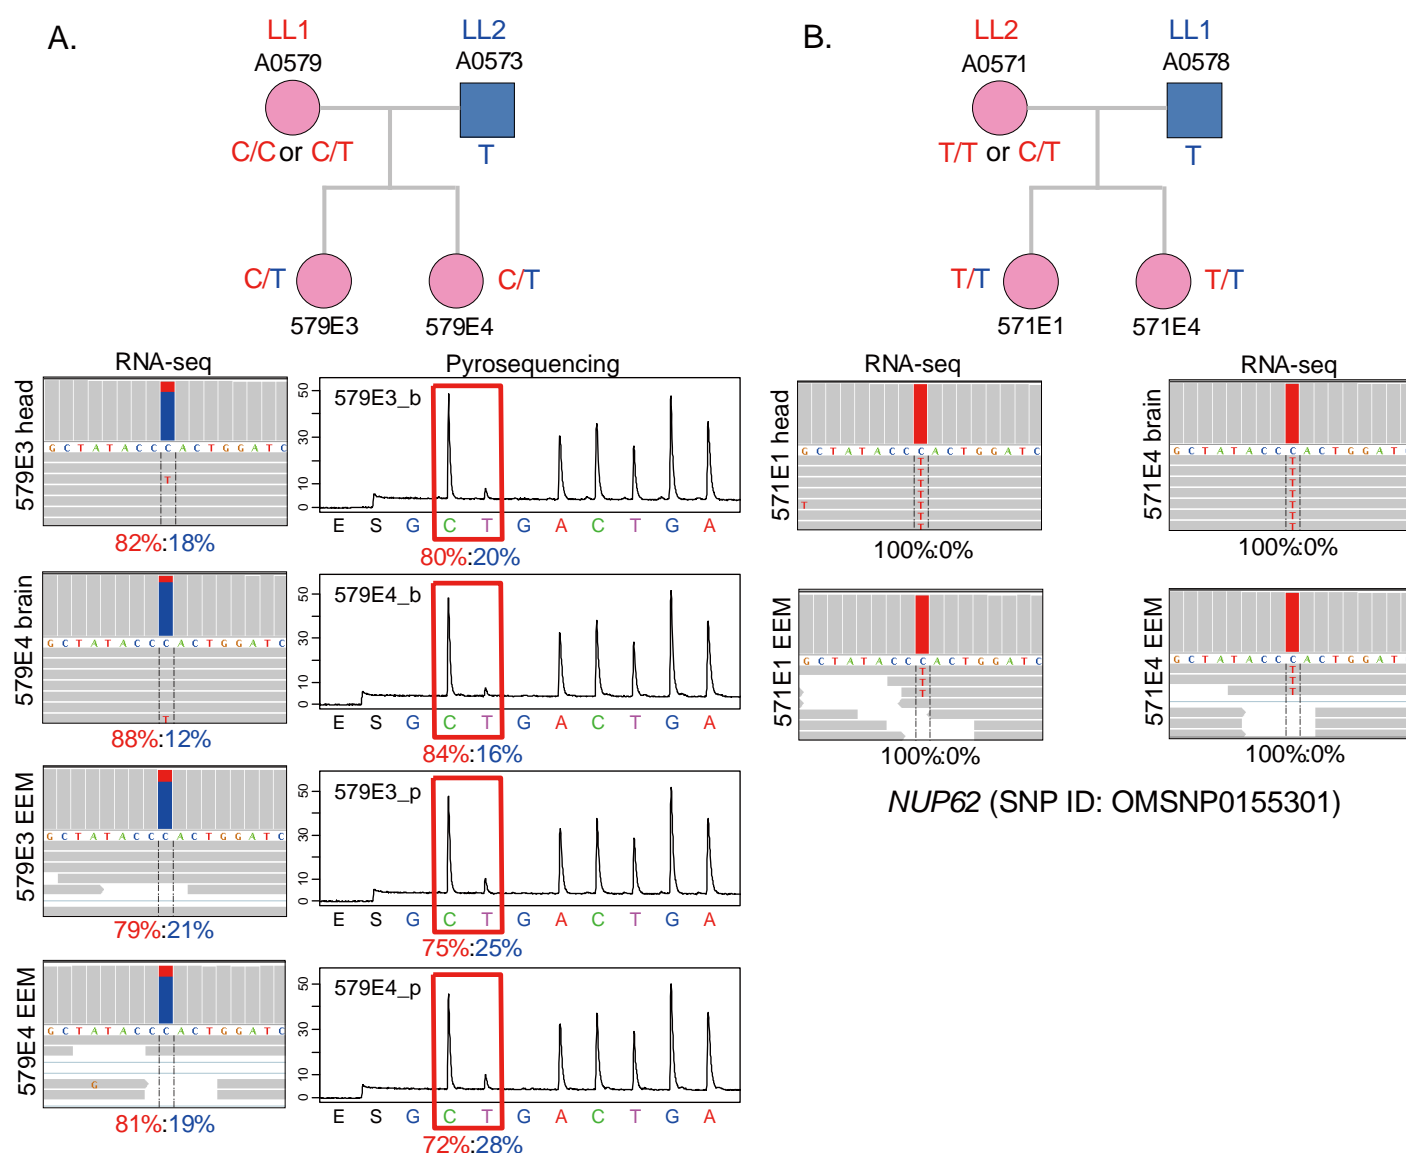

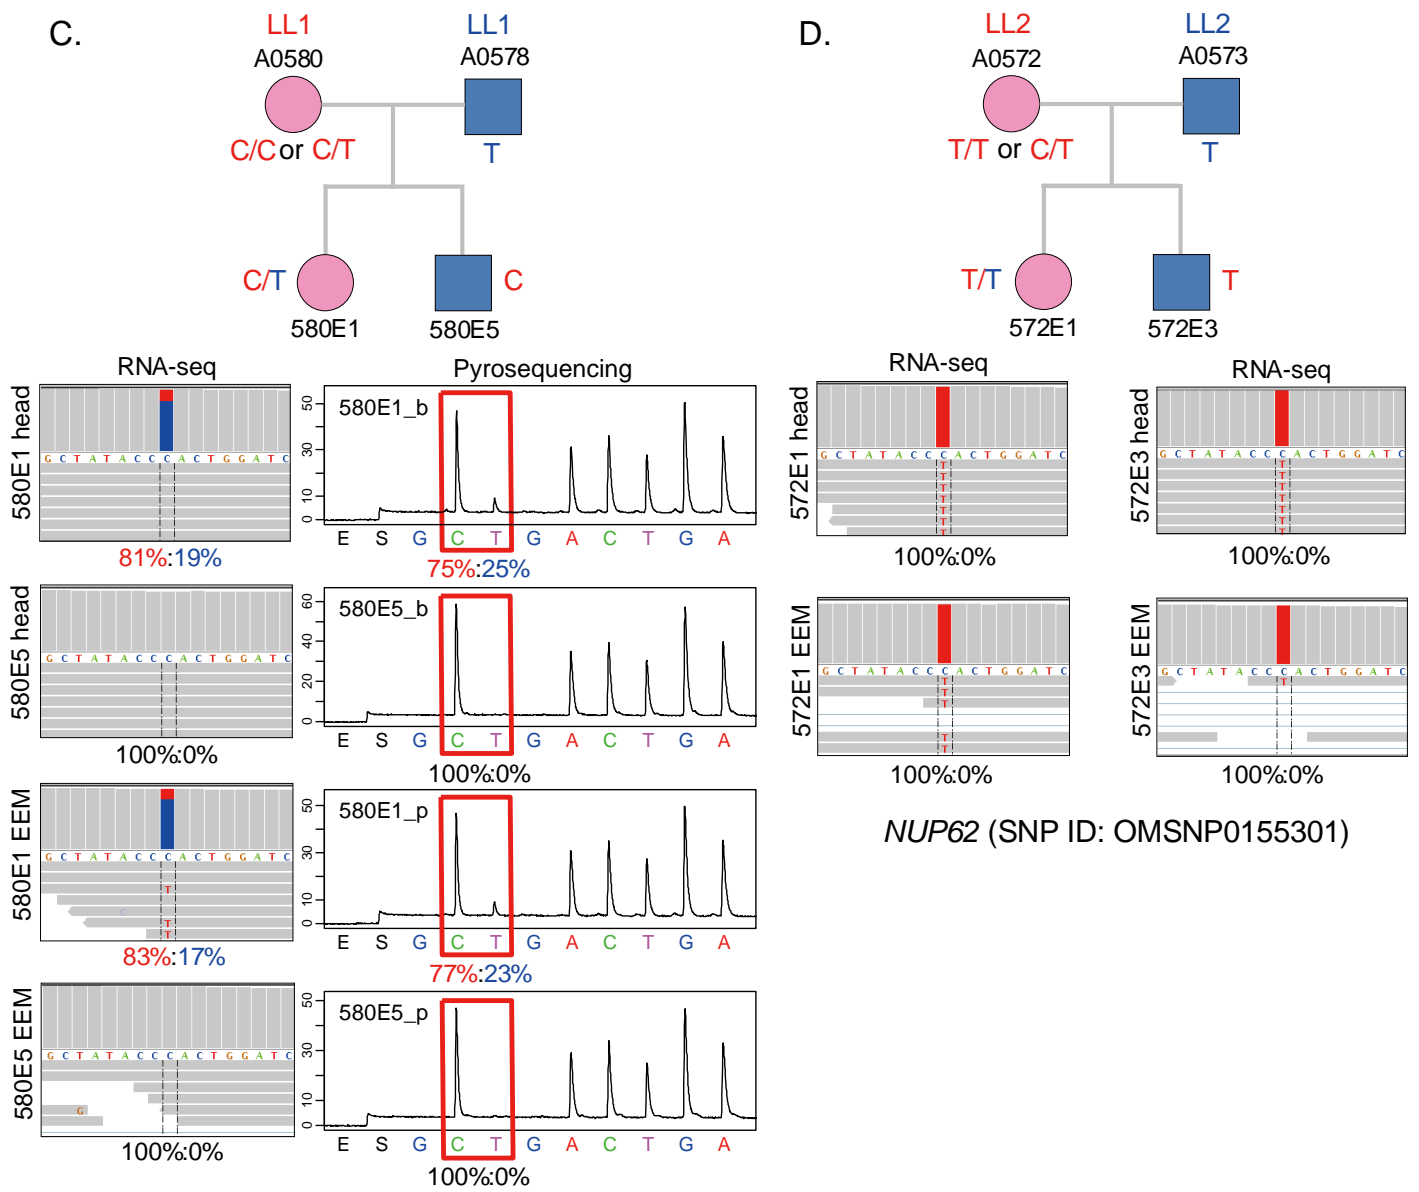



**Figure S25. RNA-seq and pyrosequencing verification results for escaper gene *HCFC1* in opossum fetal brain and EEM samples.**

(A). F1 cross of LL1 (mother) x LL2 (father). (B) Reciprocal F1 cross of LL2 (mother) x LL1 (father). (C). LL1 parental cross. (D). LL2 parental cross. The SNP (OMSNP0155431) is informative in four embryos (579E3, 579E4, 571E1 and 571E4). In brain/head and EEM tissues of all four individuals, biallelic expression was observed from both RNA-seq and allele-specific pyrosequencing verification. Therefore, *HCFC1* is an escaper of imprinted XCI in both tissues. The target sequence for pyrosequencing is T(G/A)ACAGGCAC. The SNP genotypes were called from the RNA-seq data and inferred based on the pedigree information. The parental transmission directions were unambiguously determined.

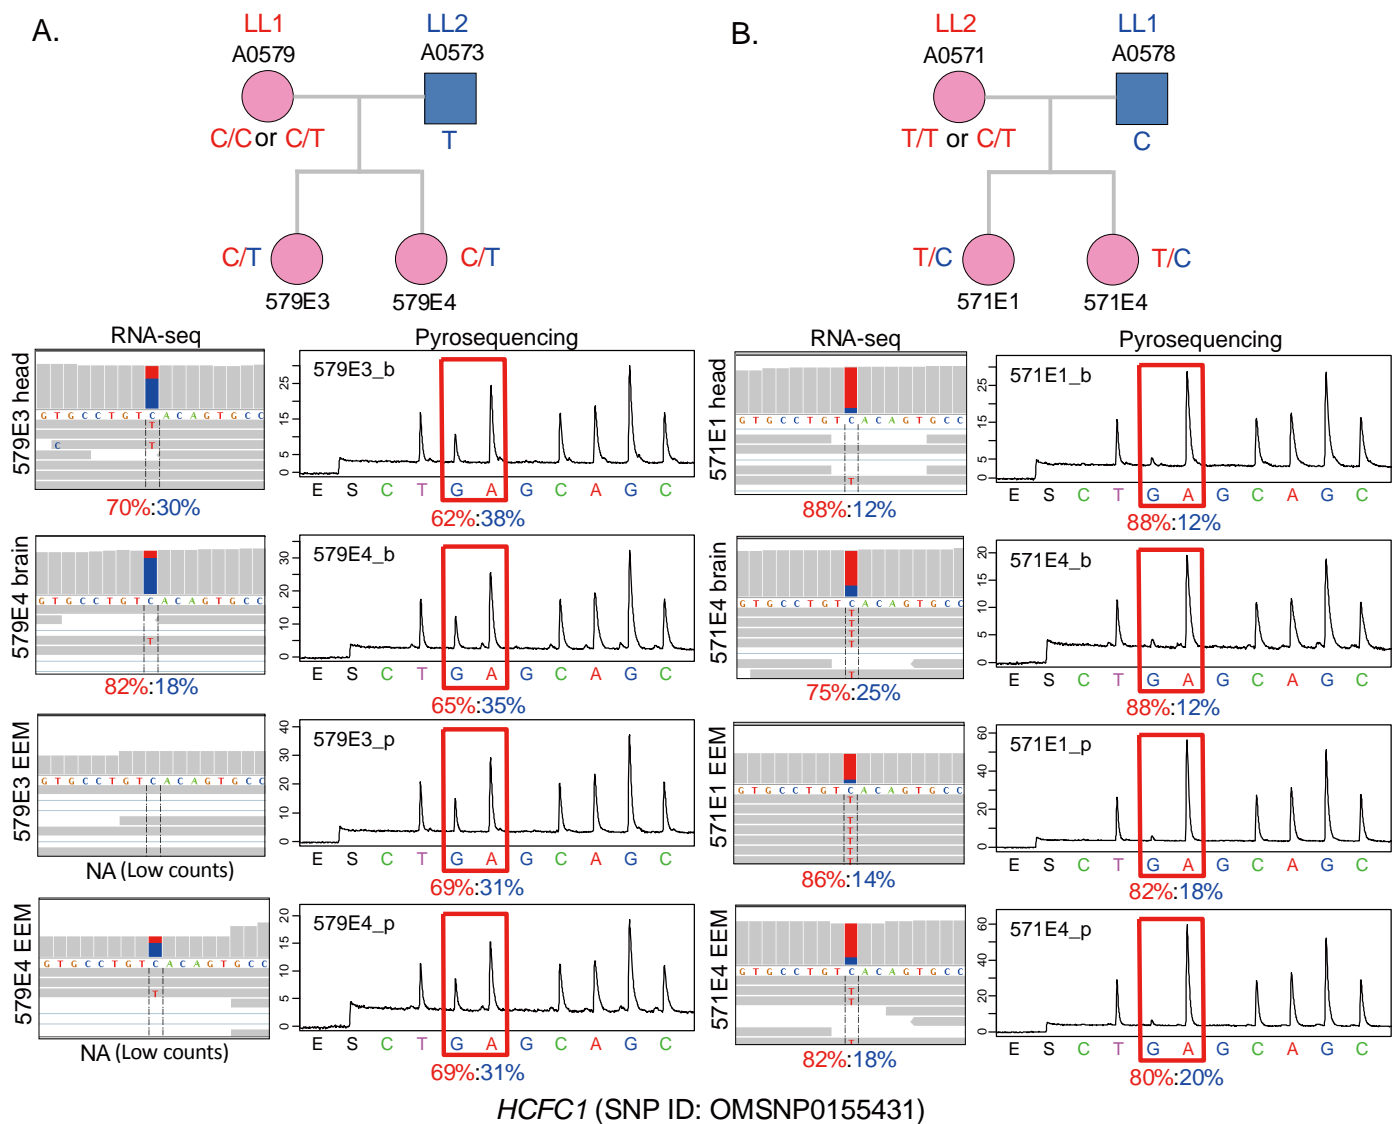



**Figure S26. RNA-seq and pyrosequencing verification results for escaper gene *MECP2* in opossum fetal brain and EEM samples.**

(A). F1 cross of LL1 (mother) x LL2 (father). (B) Reciprocal F1 cross of LL2 (mother) x LL1 (father). (C). LL1 parental cross. (D). LL2 parental cross. The SNP (OMSNP0222738) is informative in four embryos (579E3, 579E4, 571E1 and 571E4). In brain/head and EEM tissues of all four individuals, biallelic expression was observed from both RNA-seq and allele-specific pyrosequencing verification. Therefore, *MECP2* is an escaper of imprinted XCI in both tissues. The target sequence for pyrosequencing is A(C/T)TGAGTGCCC. The SNP genotypes were called from the RNA-seq data and inferred based on the pedigree information. The parental transmission directions were unambiguously determined. This SNP is located in an alternatively spliced exon.

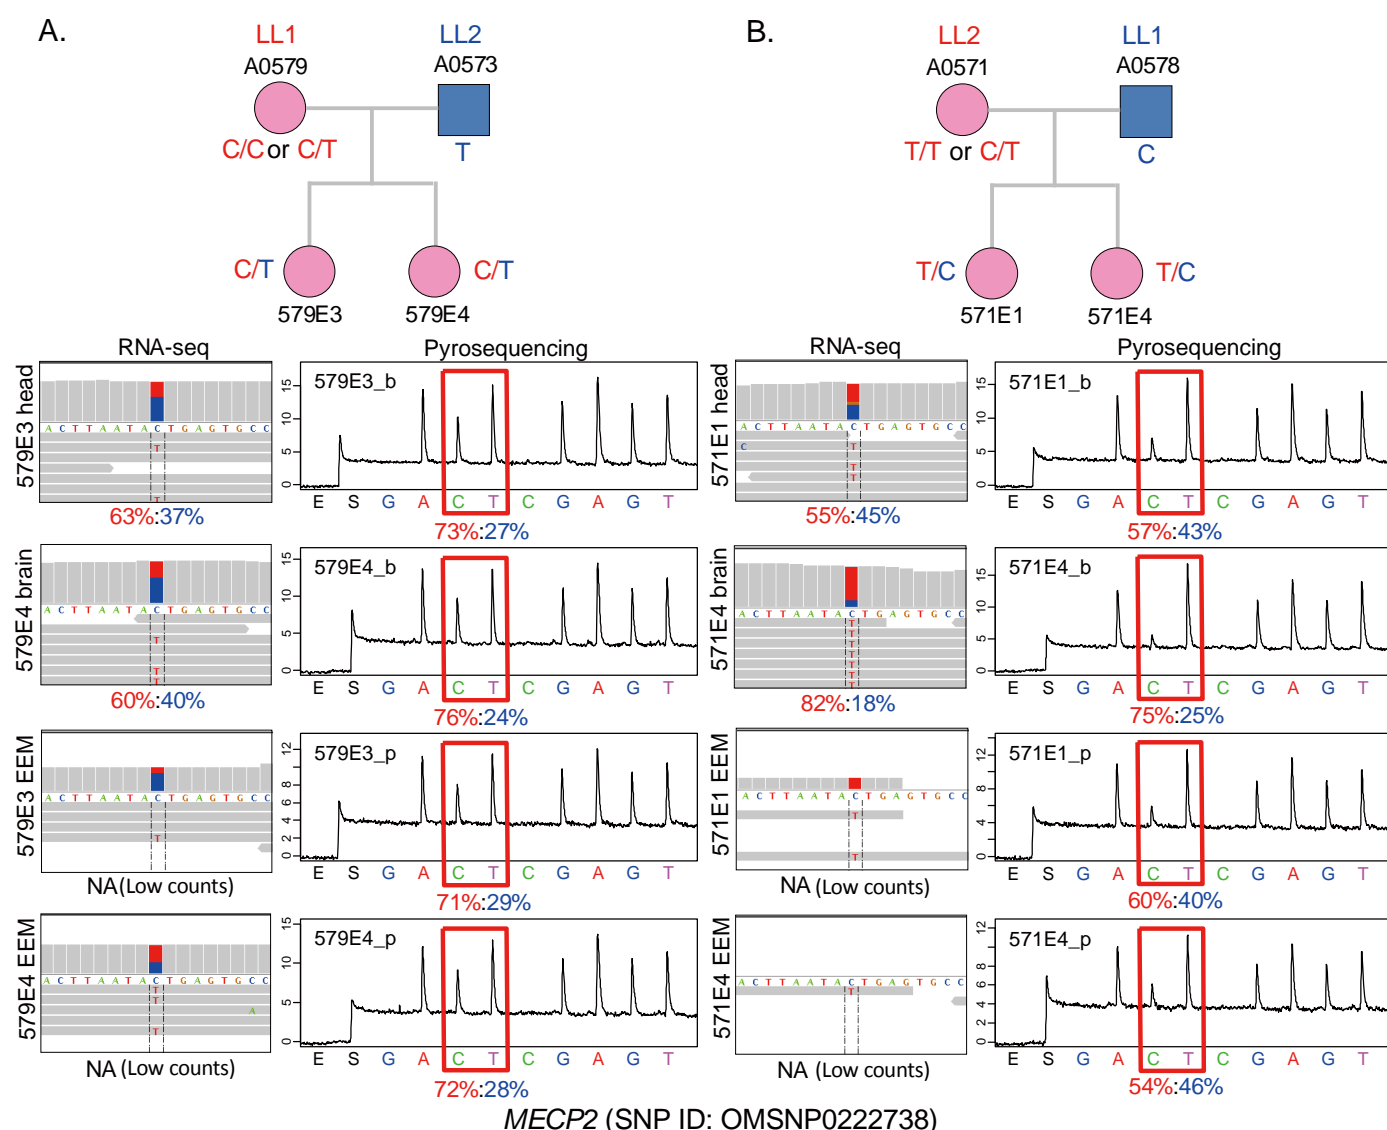

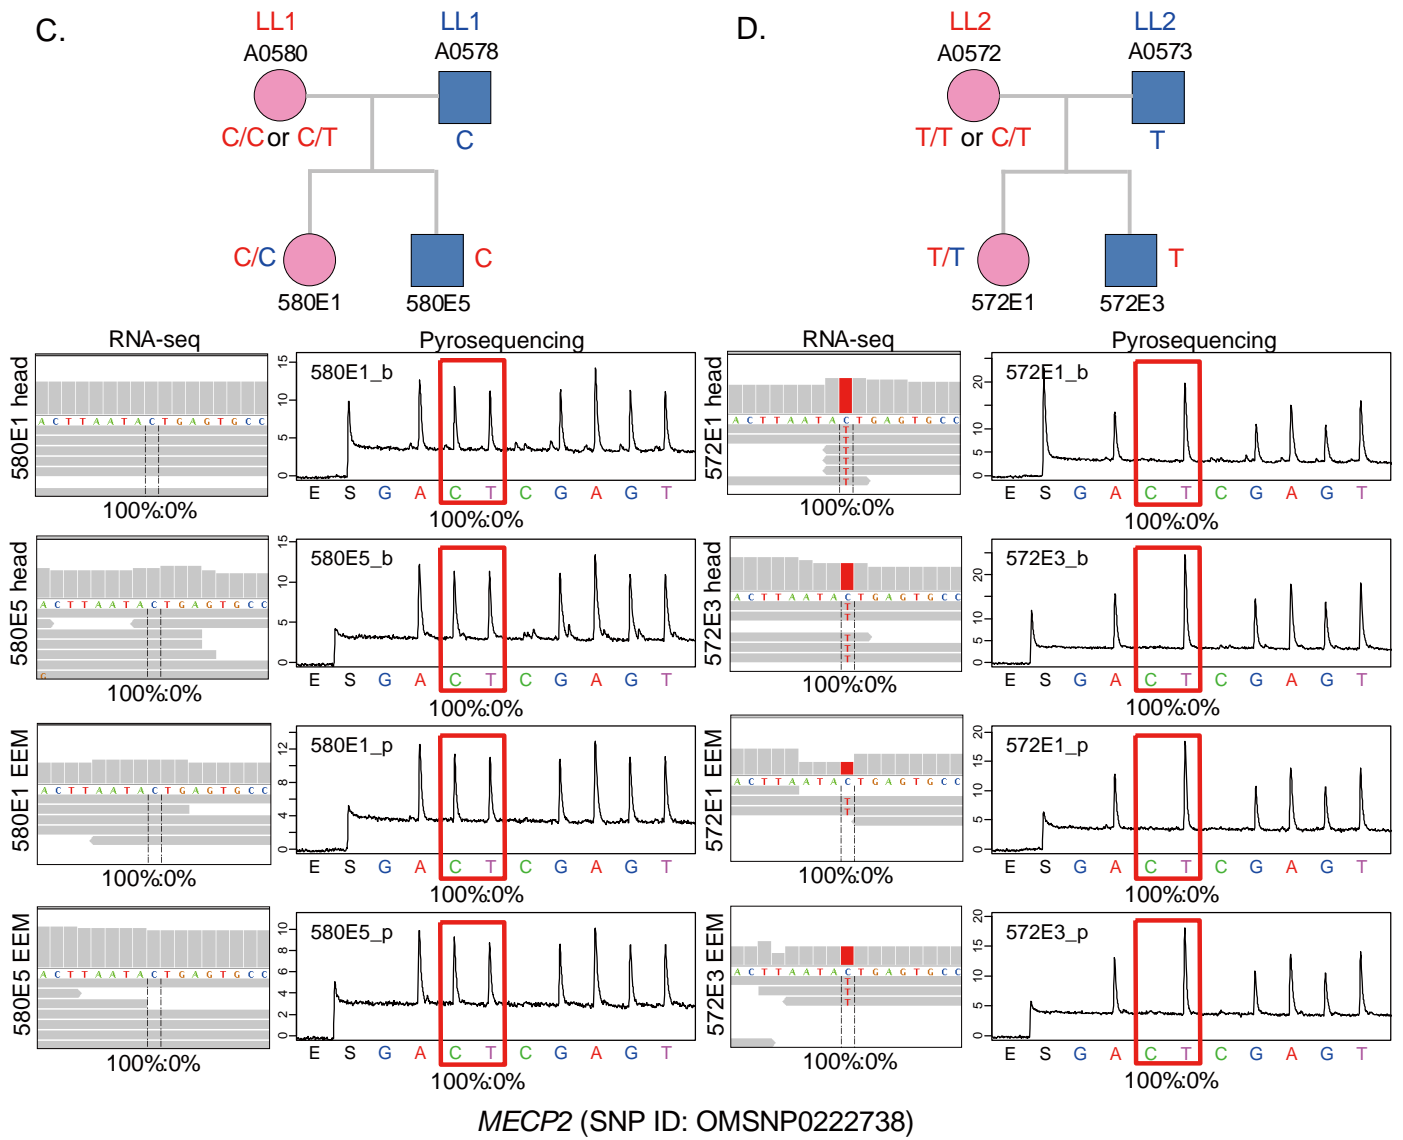

**Figure S27. RNA-seq and pyrosequencing verification results for escaper gene *PHF6* in opossum fetal brain and EEM samples.**

(A). F1 cross of LL1 (mother) x LL2 (father). (B) Reciprocal F1 cross of LL2 (mother) x LL1 (father). (C). LL1 parental cross. (D). LL2 parental cross. The SNP (OMSNP0156035) is informative in four embryos (571E1, 571E4, 580E1 and 572E1). In brain/head and EEM tissues of all four individuals, biallelic expression was observed from both RNA-seq and allele-specific pyrosequencing verification. Therefore, *PHF6* is an escaper of imprinted XCI in both tissues. The target sequence for pyrosequencing is (C/T)AGTTCTAC. The SNP genotypes were called from the RNA-seq data and inferred based on the pedigree information. The parental transmission directions were unambiguously determined. This SNP is located in an alternatively spliced exon.

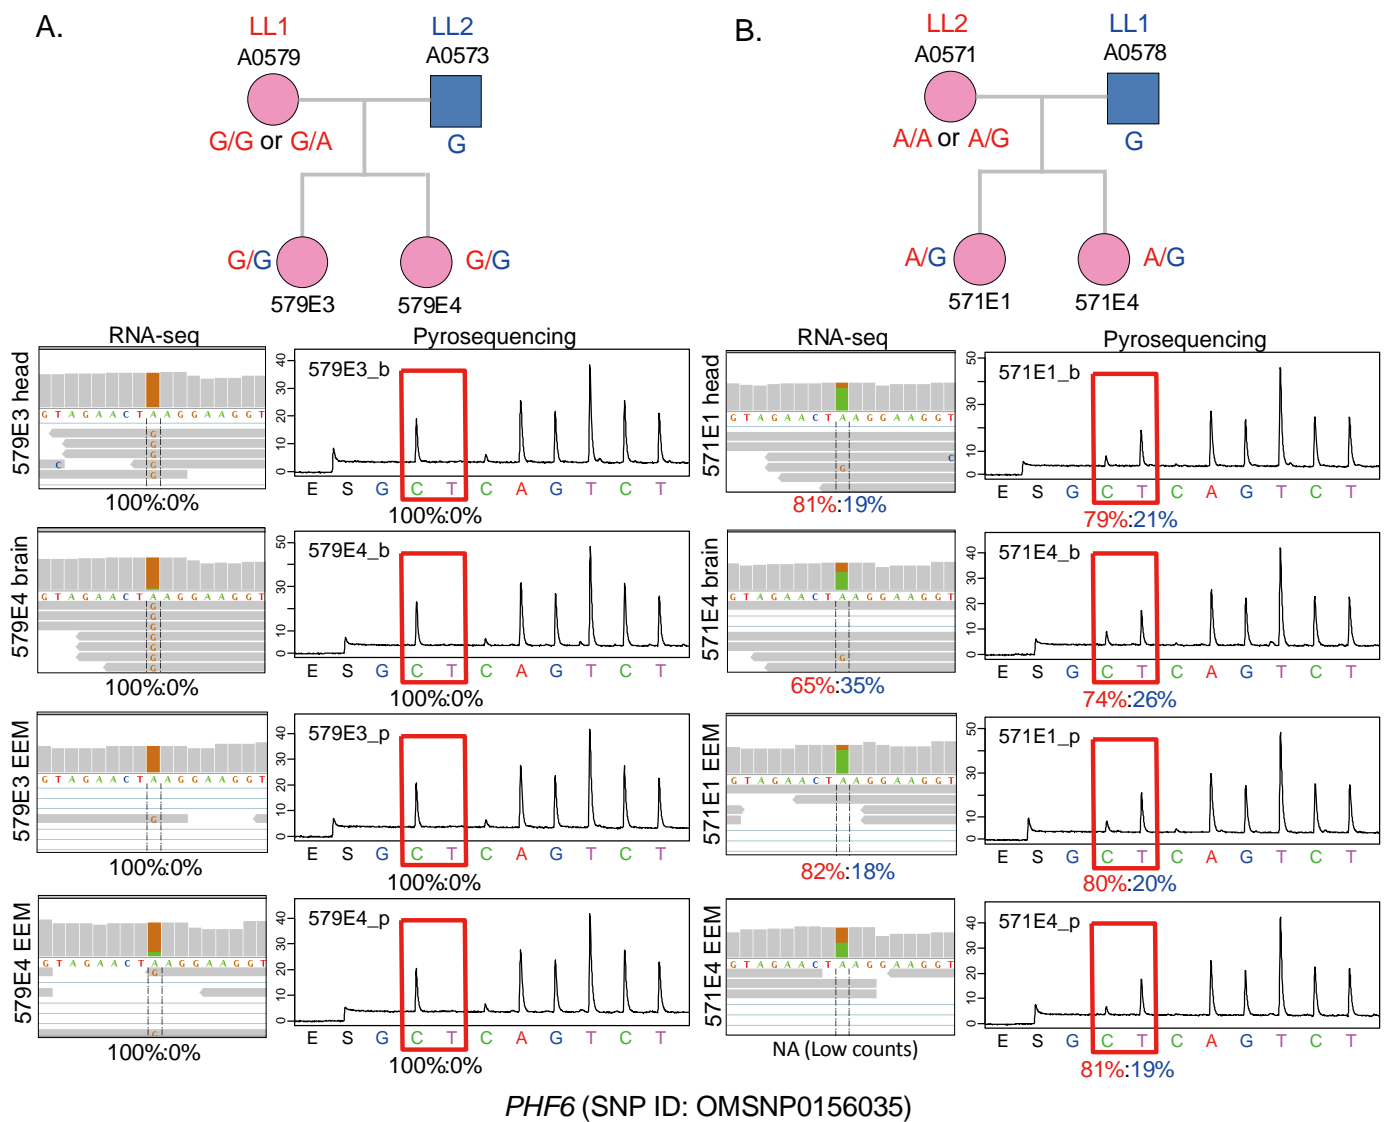

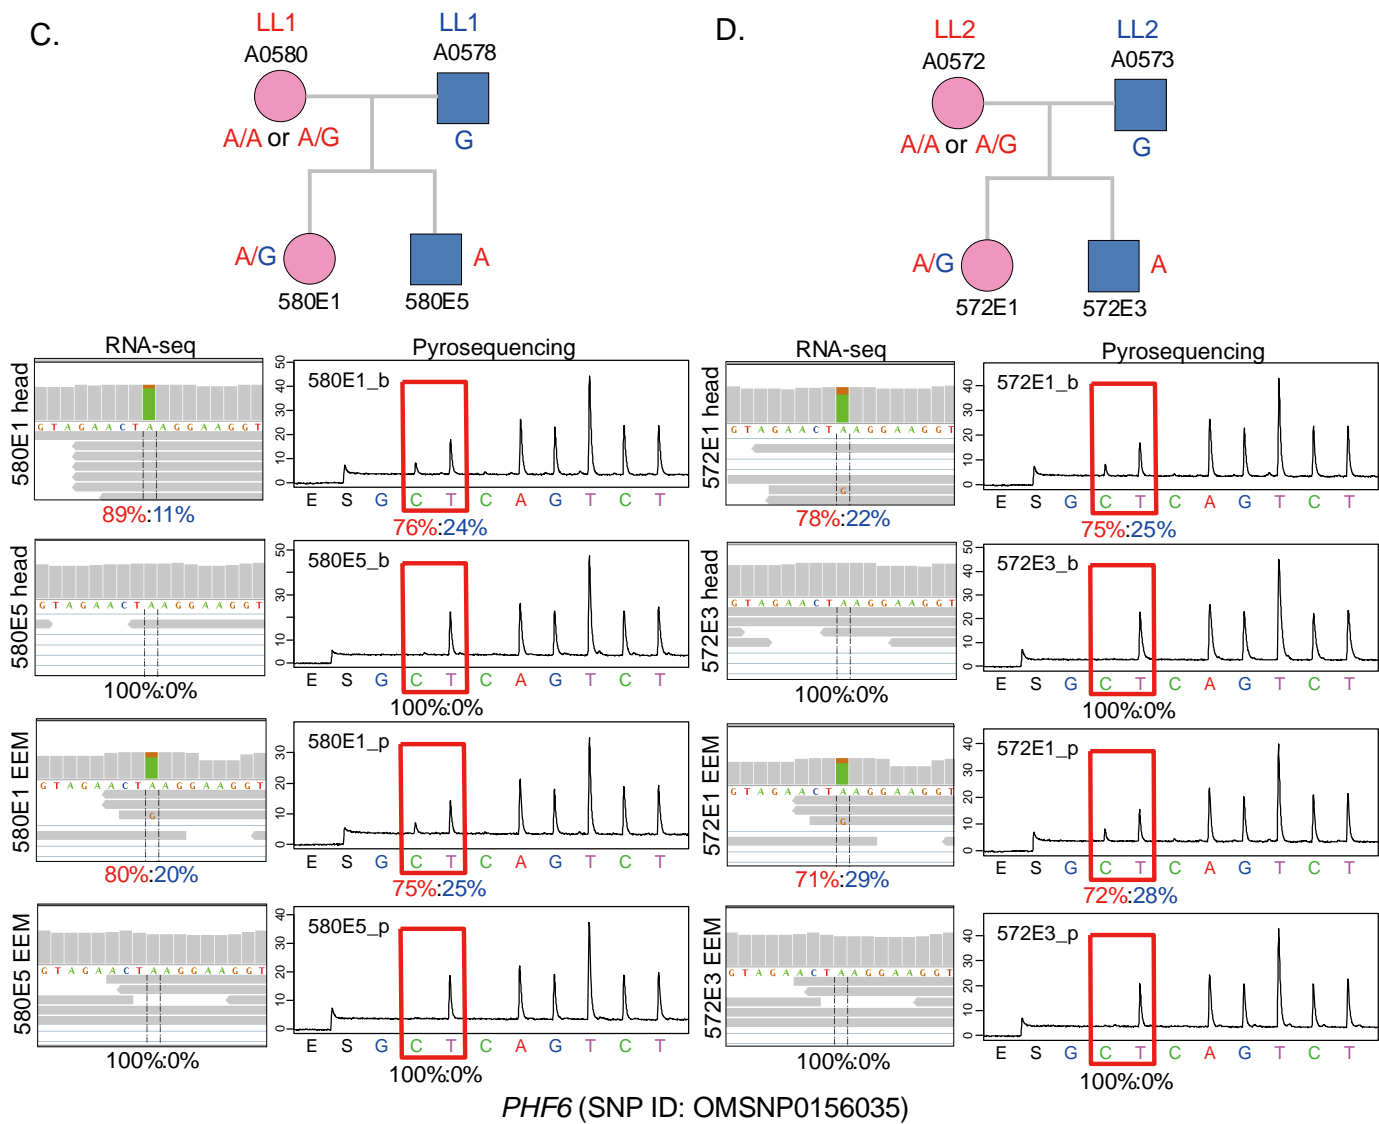

**Figure S28. RNA-seq and pyrosequencing verification results for escaper gene *CENPI* in opossum fetal brain and EEM samples.**

(A). F1 cross of LL1 (mother) x LL2 (father). (B) Reciprocal F1 cross of LL2 (mother) x LL1 (father). (C). LL1 parental cross. (D). LL2 parental cross. The SNP (chrX\_78952955) is informative in embryo 580E1. In brain/head and EEM tissues of this individual, biallelic expression was observed from both RNA-seq and allele-specific pyrosequencing verification. Therefore, *CENPI* is an escaper of imprinted XCI in both tissues. The target sequence for pyrosequencing is CT(A/G)CTATG (on the minus strand). Pyrosequencing was not performed for two of the four crosses because they are not informative (A and B). The SNP genotypes were called from the RNA-seq data and inferred based on the pedigree information. The parental transmission directions were unambiguously determined.

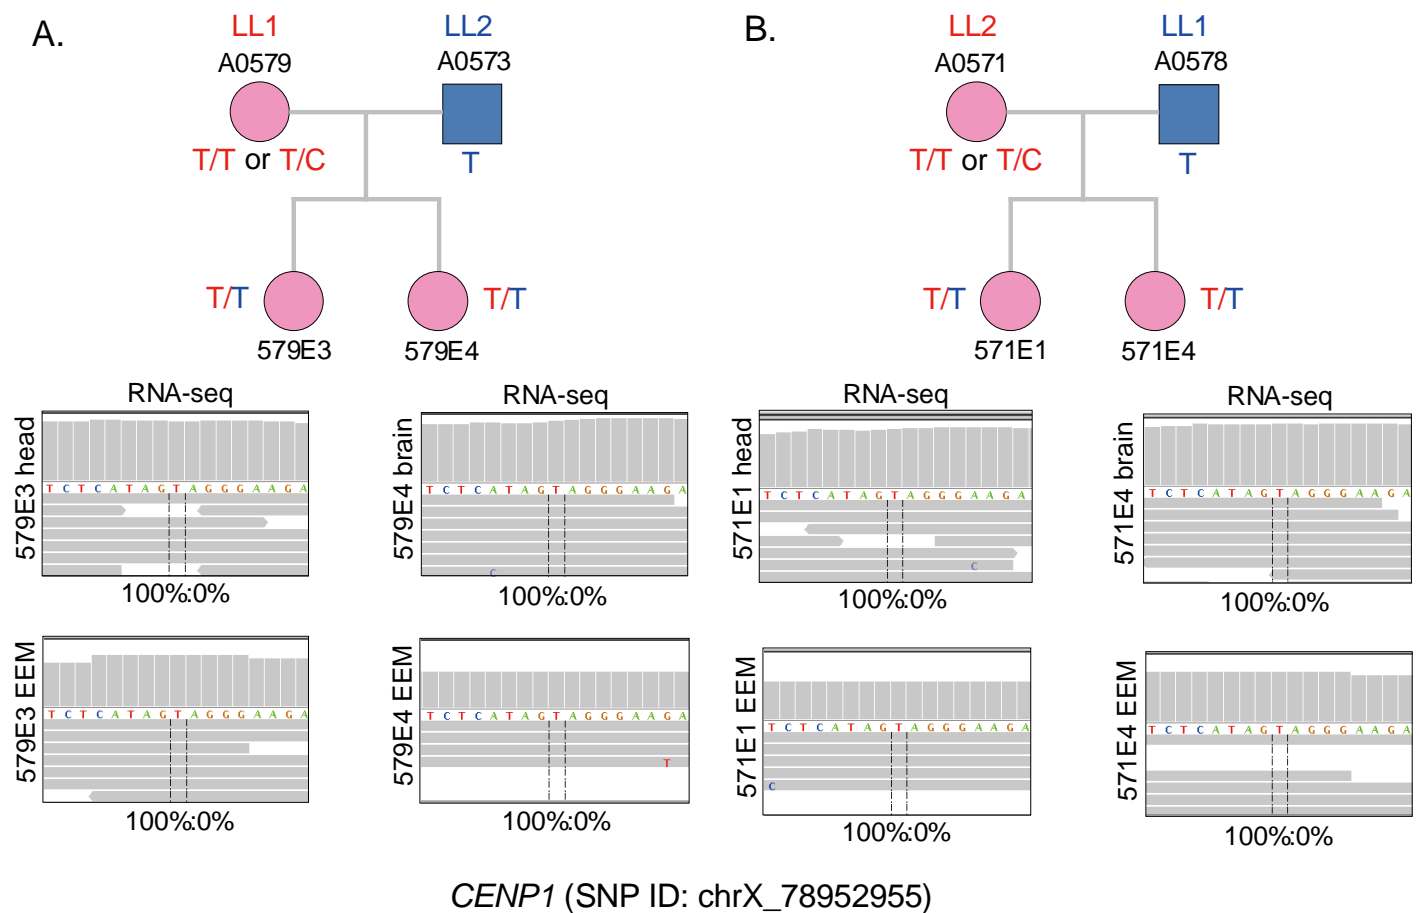





**Figure S29. Models of expected histone modification profiles for non-escaper and escaper genes.**  
 Models of expected histone modification profiles for non-escaper and escaper genes assuming pXCI is influenced by H3K4me3 (on-mark) and H3K27me3 (off-mark). (A) At non-escaper genes, the on-mark is present at the promoter of the active maternal allele and the off-mark is absent (left panel); at the repressed paternal allele there is no on mark at the promoter and the off-mark covers the entire gene region (middle panel). Both marks are present when considering both alleles together (right panel). (B) At escaper genes, both parental alleles are active in females; the on-mark is present, and off-mark absent, at the promoter of both alleles (all panels).

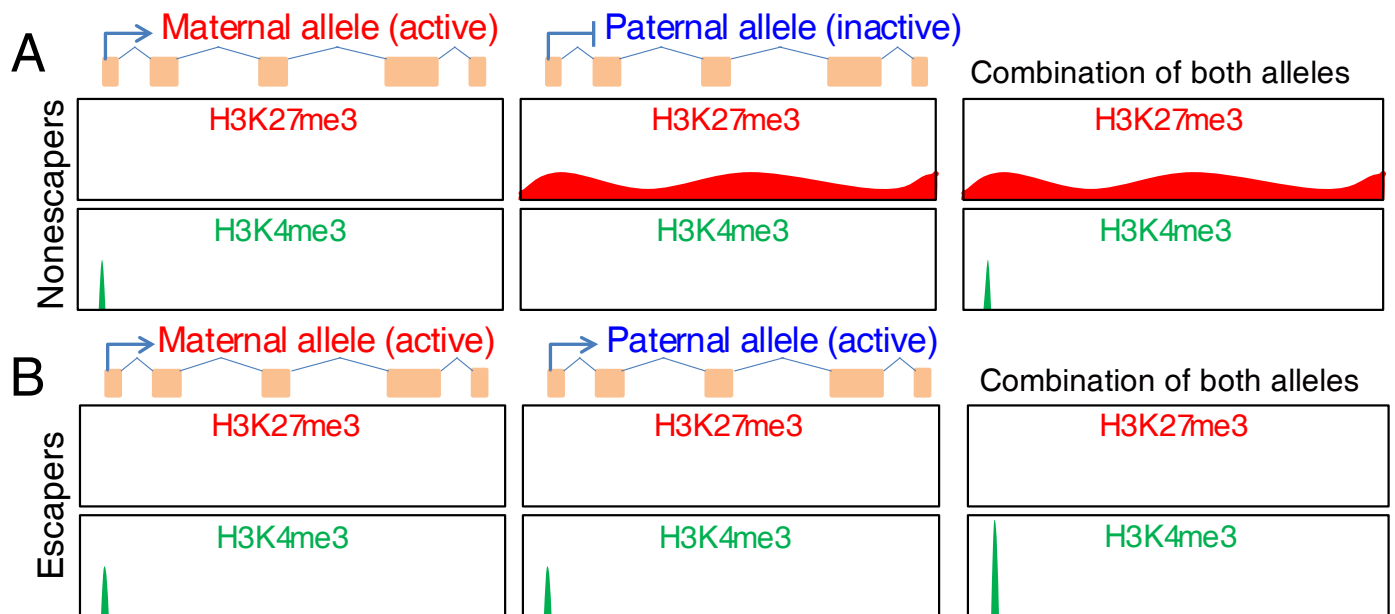

**Figure S30. Histone modification H3K4me3 and H3K27me3 peaks and coverage profile for X chromosome region containing escaper genes *G6PD* and *IKBK*G in female head and control male fibroblasts from ChIP-seq data.** (A). ChIP-seq results from female fetal head sample. (B) ChIP-seq results from control male fibroblasts. In each figure, plotted in the top panel are the genome gap locations and the H3K27me3 peaks and coverage. Gene models are shown in the middle panel, color-coded based on their imprinted XCI status (blue: escapers; red: non-escapers; gray: not known due to lack of informative SNPs). In the bottom panel are the CpG island locations and the H3K4me3 peaks and coverage profile. In females for the two escaper genes (*G6PD* and *IKBK*G), the H3K4me3 marks were present at promoter CpG islands, suggesting active transcription. The H3K27me3 marks were depleted across the gene body, consistent with biallelic expression. For the two nonescapers (*FAM3A* and *SEPHS2*), the H3K4me3 marks were present and the H3K27me3 peaks covered the entire gene body, consistent with monoallelic expression. In the control male sample, there is only one copy of X-linked genes, therefore the H3K4me3 marks were present and H3K27me3 were absent for all expressed genes in this region.

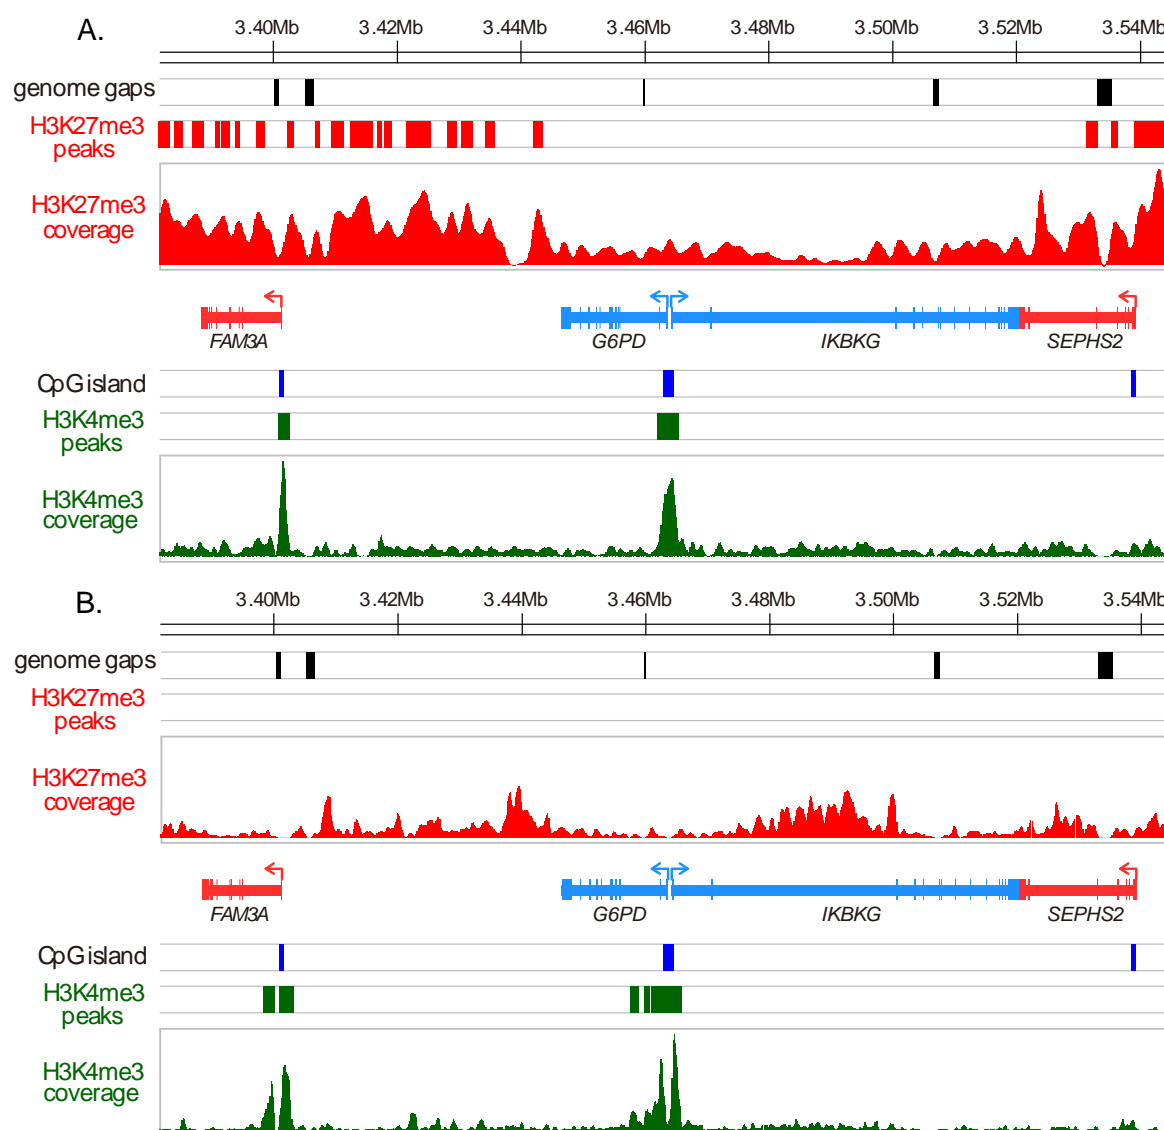

**Figure S31. Histone modification H3K4me3 and H3K27me3 peaks and coverage profile for X chromosome region containing escaper genes *FLNA* and *RPL10* in female head and control male fibroblasts from ChIP-seq data.** (A). ChIP-seq results from female fetal head sample. (B) ChIP-seq results from control male fibroblasts. In each figure, plotted in the top panel are the genome gap locations and the H3K27me3 peaks and coverage. Gene models are shown in the middle panel, color-coded based on their imprinted XCI status (blue: escapers; red: non-escapers; gray: not known due to lack of informative SNPs). In the bottom panel are the CpG island locations and the H3K4me3 peaks and coverage profile. In females for the two escaper genes (*FLNA* and *RPL10*), the H3K4me3 marks were present at promoter CpG islands, suggesting active transcription. The H3K27me3 were depleted across the gene body, consistent with biallelic expression. In the control male sample, there is only one copy of X-linked genes, therefore the H3K4me3 marks were present and H3K27me3 were absent for all expressed genes in this region.

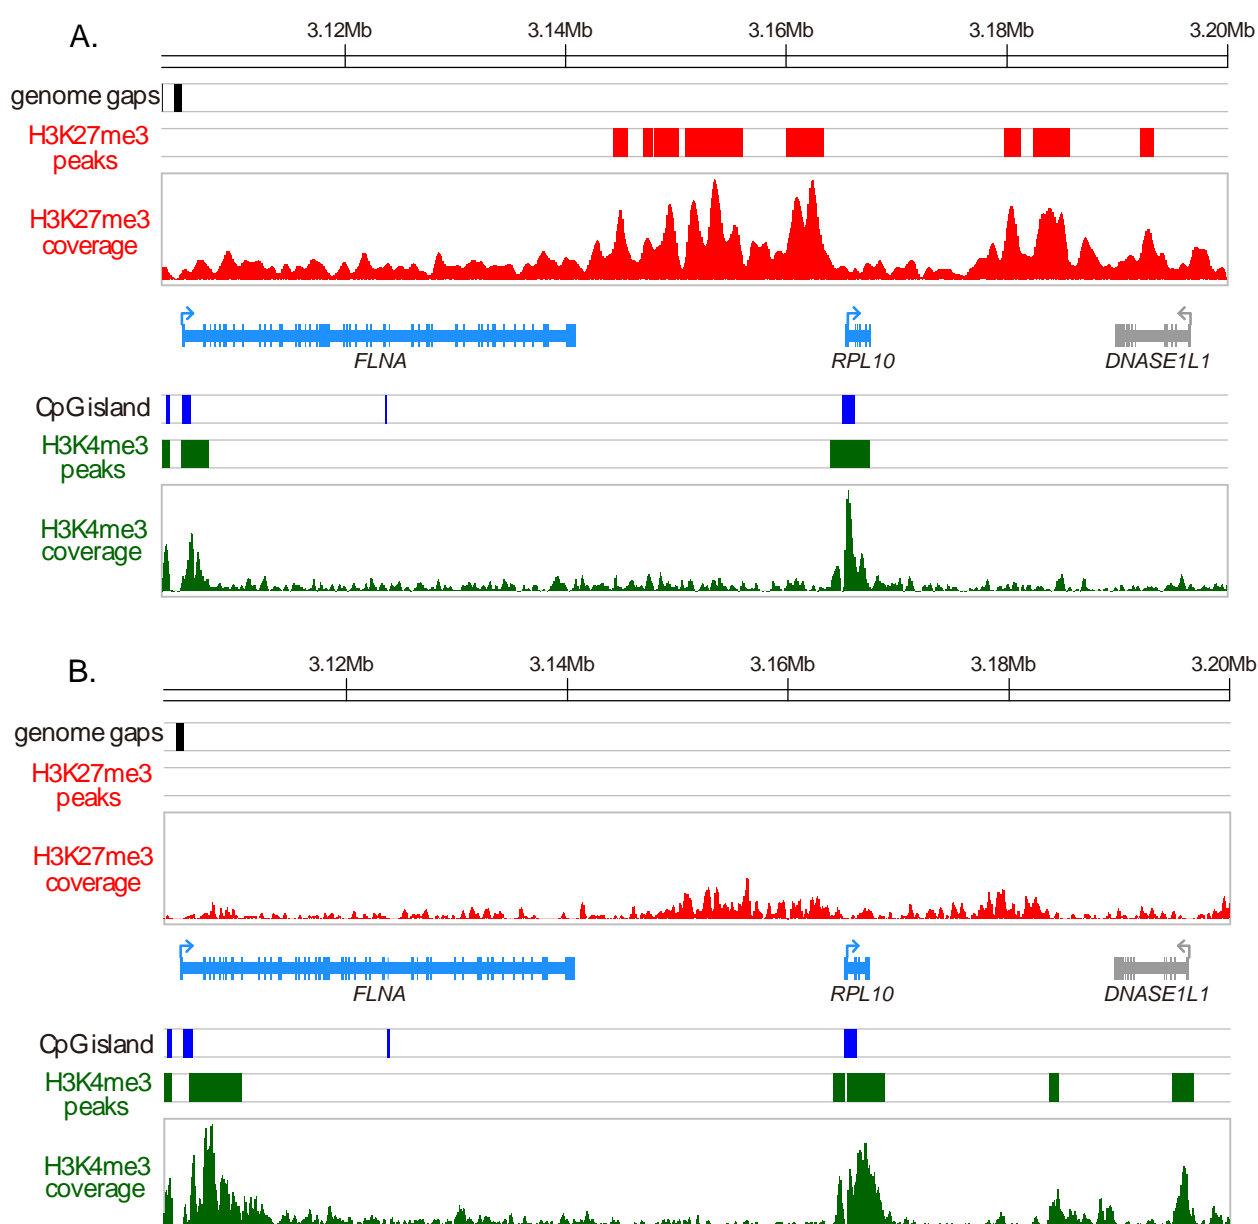

**Figure S32. Histone modification H3K4me3 and H3K27me3 peaks and coverage profile for X chromosome region containing escaper gene *PLXNA3* and candidate escaper gene *UBL4A* in female head and control male fibroblasts from ChIP-seq data.** (A). ChIP-seq results from female fetal head sample. (B) ChIP-seq results from control male fibroblasts. In each figure, plotted in the top panel are the genome gap locations and the H3K27me3 peaks and coverage. Gene models are shown in the middle panel, color-coded based on their imprinted XCI status (blue: escapers; red: non-escapers; gray: not known due to lack of informative SNPs). In the bottom panel are the CpG island locations and the H3K4me3 peaks and coverage profile. In females for the escaper gene *PLXNA3*, the H3K4me3 mark was present at promoter CpG islands, suggesting active transcription. The H3K27me3 marks were depleted across the gene body, consistent with biallelic expression. The downstream gene *UBL4A* does not have informative SNPs, but its histone modification profile suggests it is a candidate escaper. The other three non-informative genes (*ATP6AP1*, *GDI1* and *SLC10A3*) were covered with H3K27me3 peaks across the entire gene body, consistent with nonescaper status. In the control male sample, there is only one copy of X-linked genes, therefore the H3K4me3 marks were present and H3K27me3 were absent for all five expressed genes in this region.

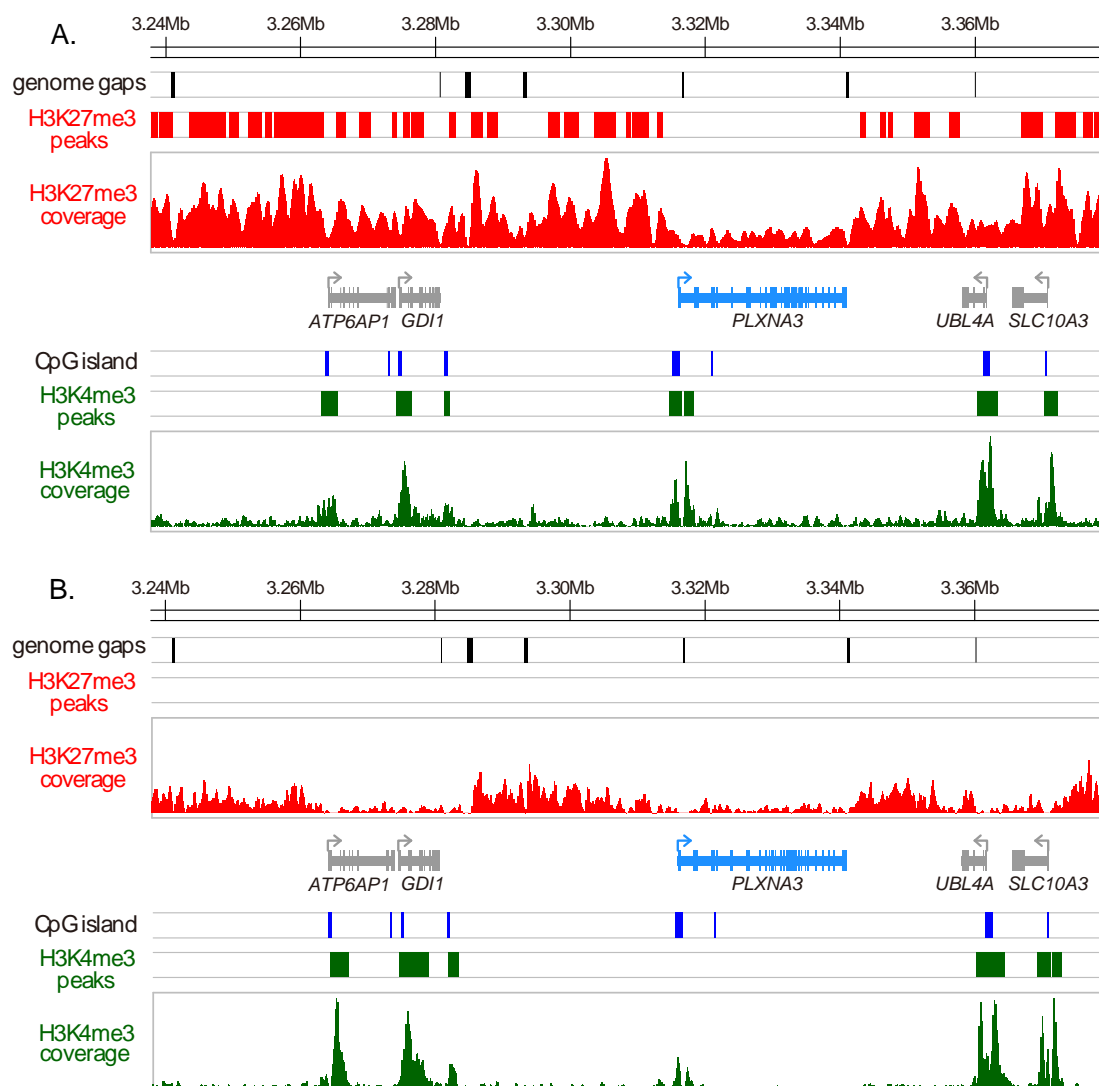

**Figure S33. Histone modification H3K4me3 and H3K27me3 peaks and coverage profile for X chromosome region containing escaper gene *DKC1* in female head and control male fibroblasts from ChIP-seq data.** (A). ChIP-seq results from female fetal head sample. (B) ChIP-seq results from control male fibroblasts. In each figure, plotted in the top panel are the genome gap locations and the H3K27me3 peaks and coverage. Gene models are shown in the middle panel, color-coded based on their imprinted XCI status (blue: escapers; red: non-escapers; gray: not known due to lack of informative SNPs). In the bottom panel are the CpG island locations and the H3K4me3 peaks and coverage profile. In females for the escaper gene *DKC1*, the H3K4me3 marks were present at promoter CpG islands, suggesting active transcription. The H3K27me3 marks were depleted across the gene body, consistent with biallelic expression. For the nonescaper gene *MPP1*, the H3K27me3 peaks covered the entire gene body, consistent with monoallelic expression. In the control male sample, there is only one copy of X-linked genes, therefore the H3K4me3 marks were present and H3K27me3 marks were absent for all expressed genes in this region.

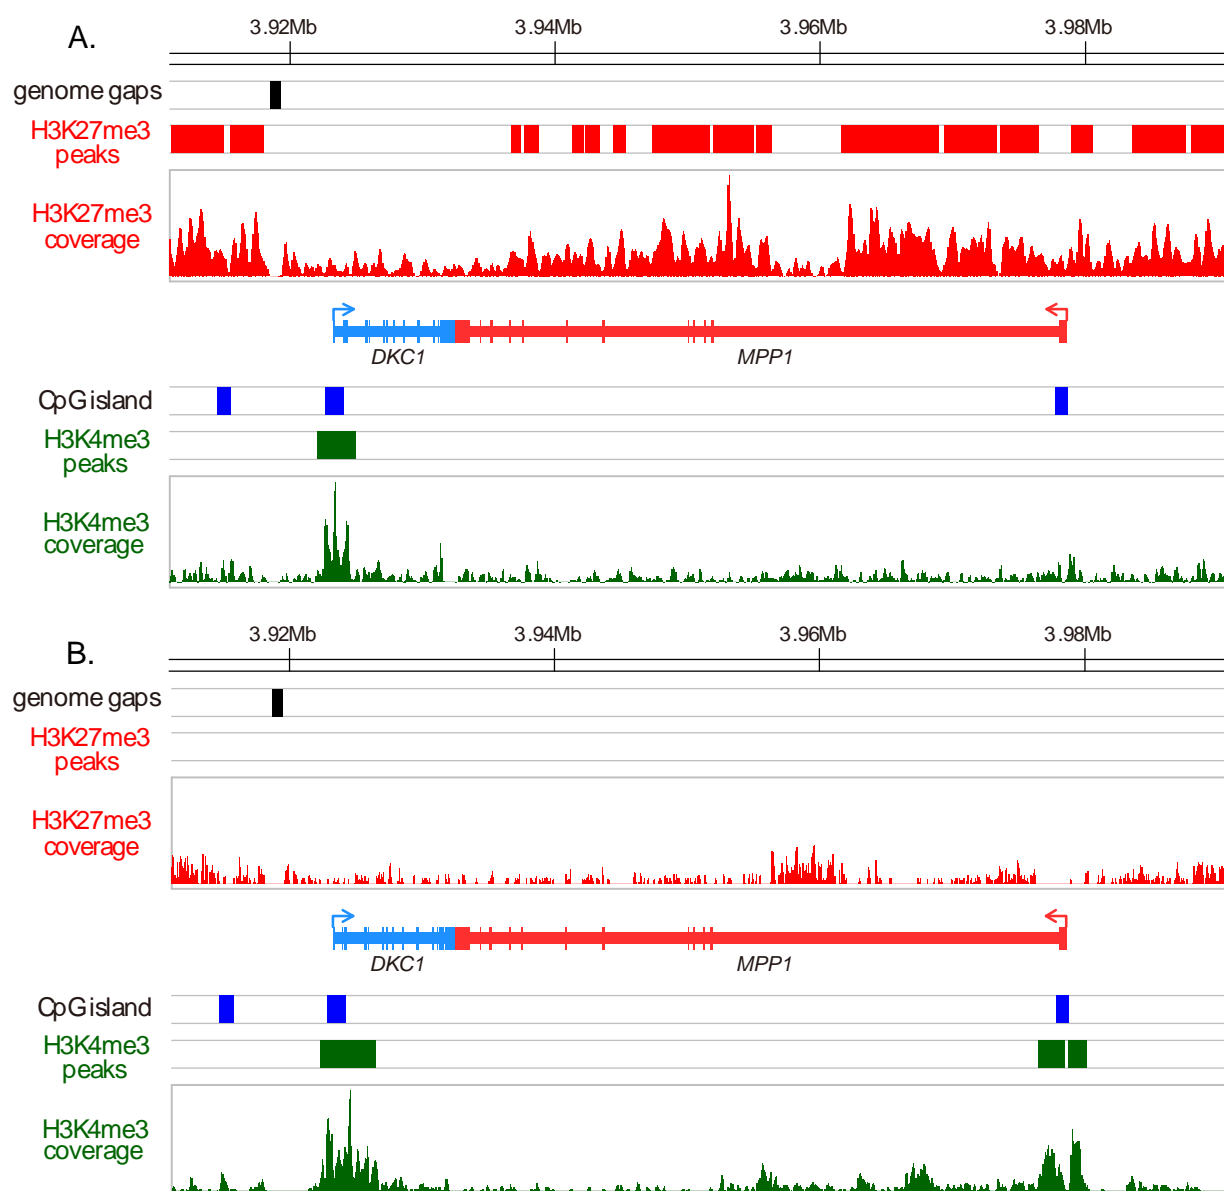

**Figure S34. Histone modification H3K4me3 and H3K27me3 peaks and coverage profile for X chromosome region containing escaper gene *YIPF6* in female head and control male fibroblasts from ChIP-seq data.** (A). ChIP-seq results from female fetal head sample. (B) ChIP-seq results from control male fibroblasts. In each figure, plotted in the top panel are the genome gap locations and the H3K27me3 peaks and coverage. Gene models are shown in the middle panel, color-coded based on their imprinted XCI status (blue: escapers; red: non-escapers; gray: not known due to lack of informative SNPs). In the bottom panel are the CpG island locations and the H3K4me3 peaks and coverage profile. In females for the escaper gene *YIPF6*, the H3K4me3 mark was present at the promoter CpG island, suggesting active transcription. The H3K27me3 marks were depleted across the gene body, consistent with biallelic expression. In the control male sample, there is only one copy of X-linked genes, therefore the H3K4me3 mark was present and H3K27me3 was absent for *YIPF6*.

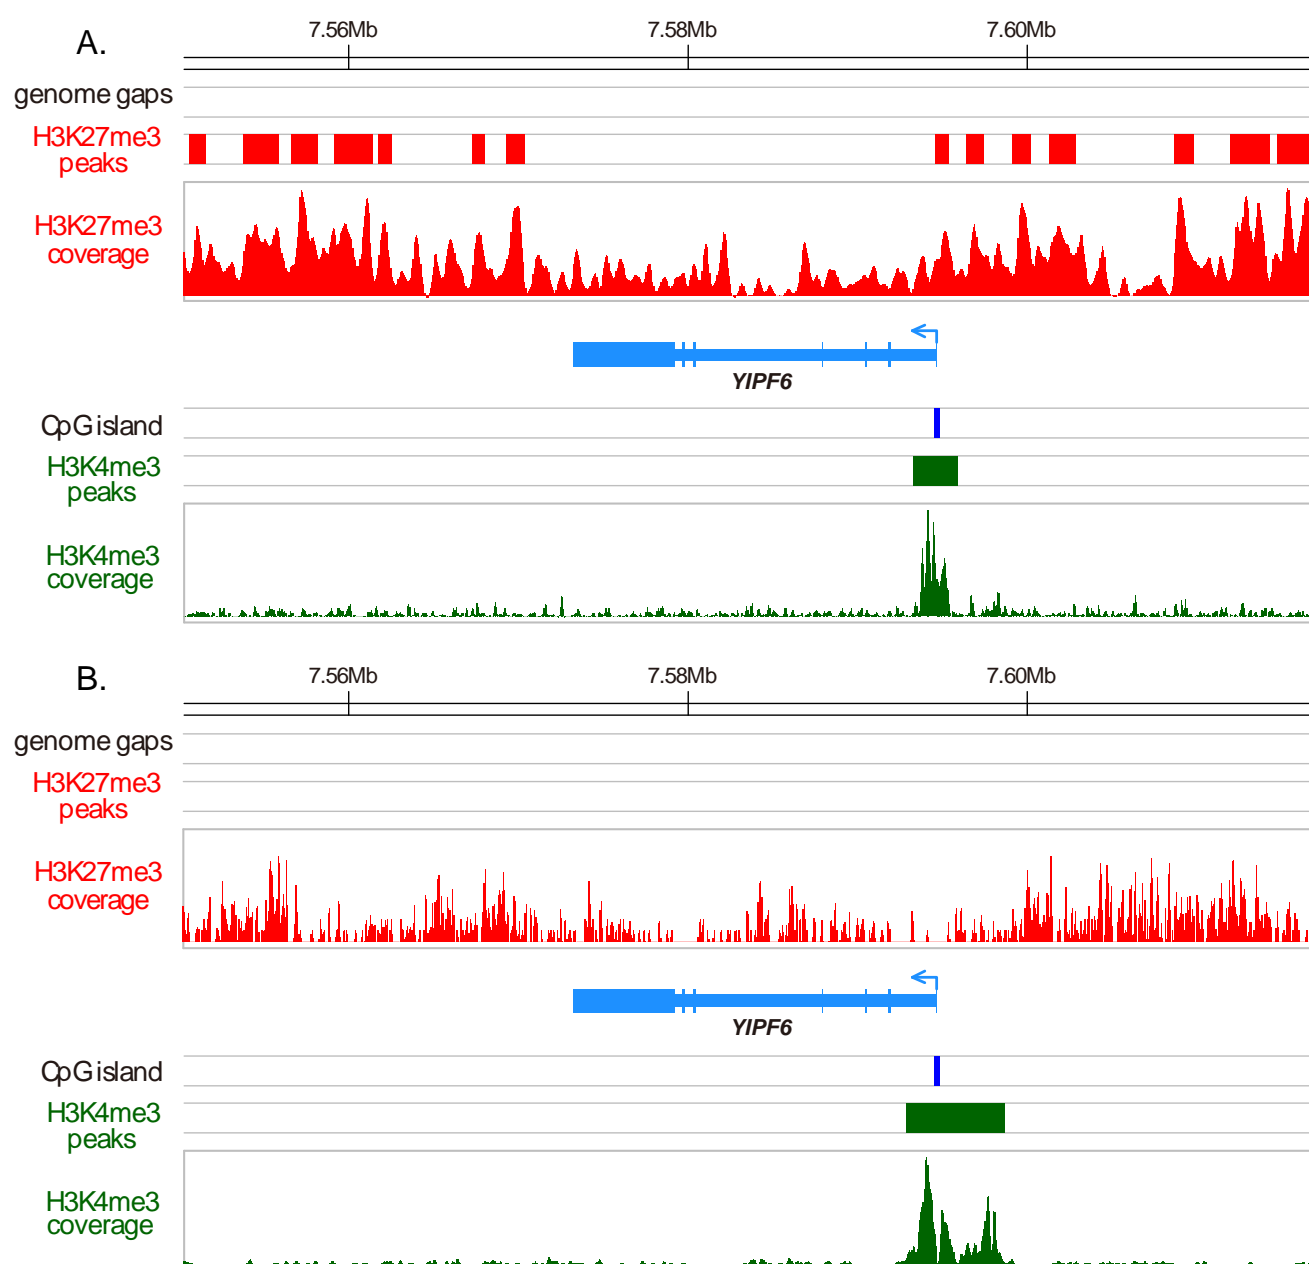

**Figure S35. Histone modification H3K4me3 and H3K27me3 peaks and coverage profile for X chromosome region containing escaper gene *NUP62* in female head and control male fibroblasts from ChIP-seq data.** (A). ChIP-seq results from female fetal head sample. (B) ChIP-seq results from control male fibroblasts. In each figure, plotted in the top panel are the genome gap locations and the H3K27me3 peaks and coverage. Gene models are shown in the middle panel, color-coded based on their imprinted XCI status (blue: escapers; red: non-escapers; gray: not known due to lack of informative SNPs). In the bottom panel are the CpG island locations and the H3K4me3 peaks and coverage profile. In females for the escaper gene *NUP62*, the H3K4me3 mark was present at the promoter CpG island, suggesting active transcription. The H3K27me3 marks were depleted across the gene body, consistent with biallelic expression. For the nonescaper gene *RBM41*, the H3K4me3 peak was present and the H3K27me3 peaks covered the entire gene body, consistent with monoallelic expression. In the control male sample, there is only one copy of X-linked genes, therefore the H3K4me3 mark was present and H3K27me3 marks were absent for all expressed genes in this region.

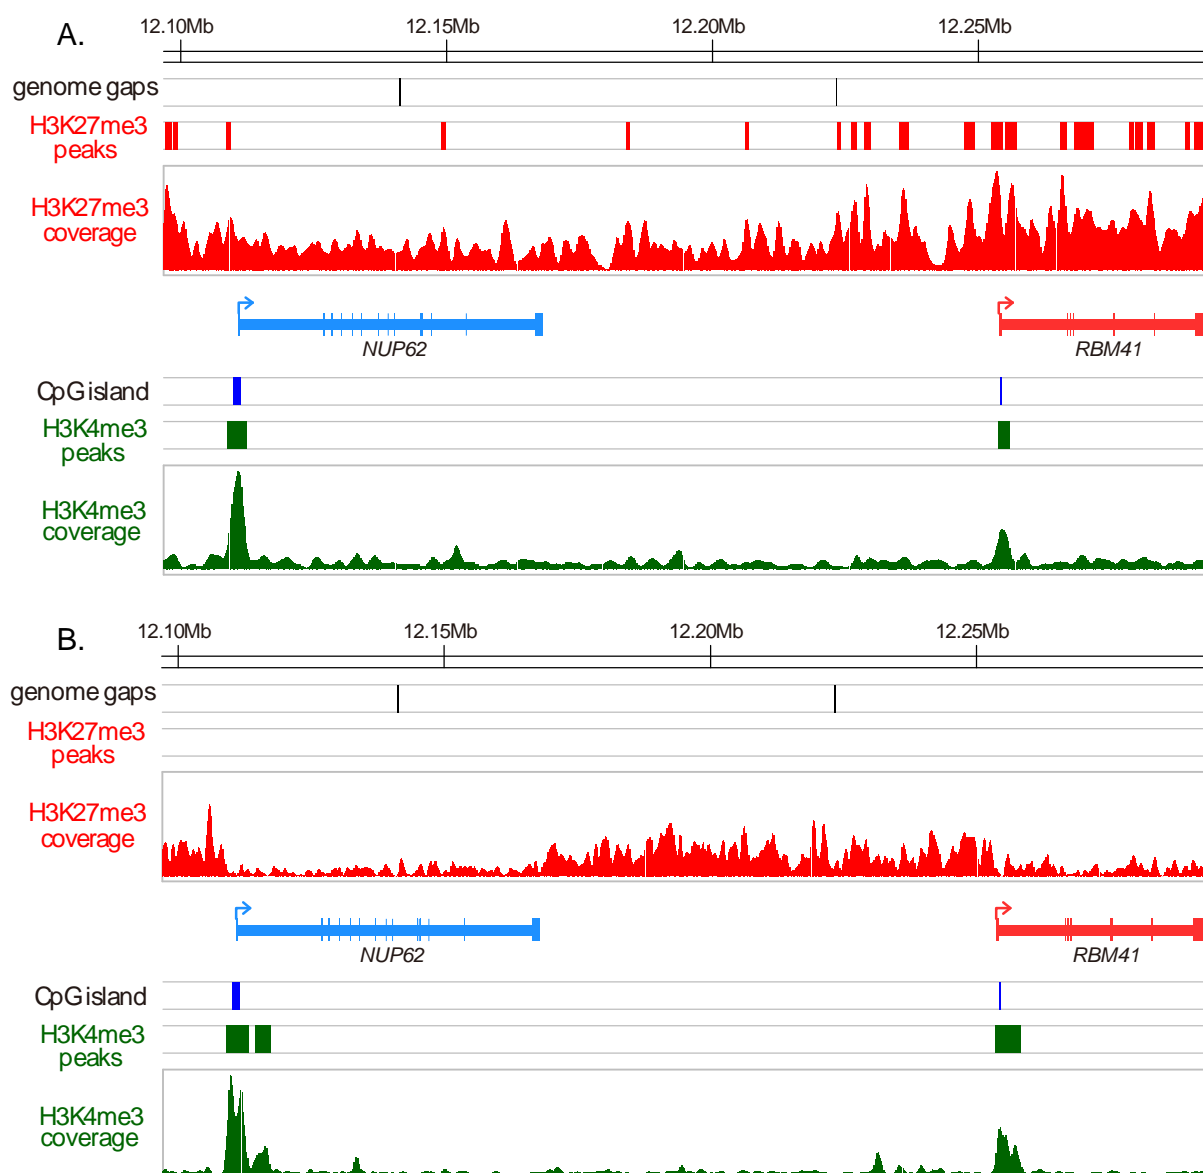

**Figure S36. Histone modification H3K4me3 and H3K27me3 peaks and coverage profile for X chromosome region containing escaper genes *HCFC1*, *IRAK1* and *MECP2* in female head and control male fibroblasts from ChIP-seq data.** (A). ChIP-seq results from female fetal head sample. (B) ChIP-seq results from control male fibroblasts. In each figure, plotted in the top panel are the genome gap locations and the H3K27me3 peaks and coverage. Gene models are shown in the middle panel, color-coded based on their imprinted XCI status (blue: escapers; red: non-escapers; gray: not known due to lack of informative SNPs). In the bottom panel are the CpG island locations and the H3K4me3 peaks and coverage profile. In females for the three escaper genes (*HCFC1*, *IRAK1* and *MECP2*), the H3K4me3 marks were present at promoter CpG islands, suggesting active transcription. The H3K27me3 marks were depleted across the gene body, consistent with biallelic expression. For the two nonescapers (*TKTL1* and *LOC10002972*), the H3K4me3 marks were present and the H3K27me3 peaks covered the entire gene body, consistent with monoallelic expression. For the rest four genes, there is no informative SNP to infer the XCI status from RNA-seq data, but the histone modification profile of *NAA10* is consistent with escaper status. In the control male sample, there is only one copy of X-linked genes, therefore the H3K4me3 marks were present and H3K27me3 were absent for all expressed genes in this region.

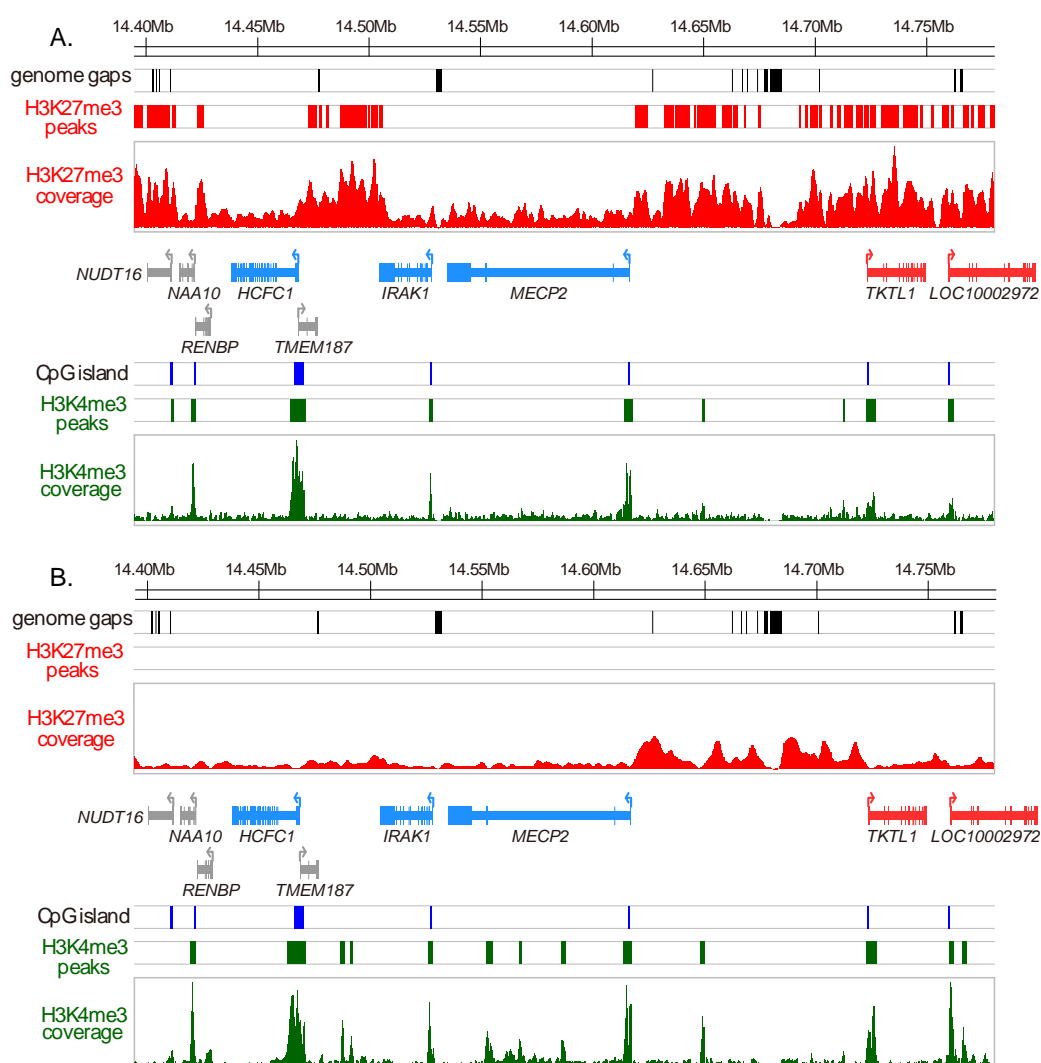



**Figure S37. Histone modification H3K4me3 and H3K27me3 peaks and coverage profile for X chromosome region containing escaper gene *FRMD7* in female head and control male fibroblasts from ChIP-seq data.** (A). ChIP-seq results from female fetal head sample. (B) ChIP-seq results from control male fibroblasts. In each figure, plotted in the top panel are the genome gap locations and the H3K27me3 peaks and coverage. Gene models are shown in the middle panel, color-coded based on their imprinted XCI status (blue: escapers; red: non-escapers; gray: not known due to lack of informative SNPs). In the bottom panel are the CpG island locations and the H3K4me3 peaks and coverage profile. In females for the escaper gene *FRMD7*, the H3K4me3 peak was present at promoter CpG islands, suggesting active transcription. The H3K27me3 marks were depleted across the gene body, consistent with biallelic expression. For the nonescaper gene *RAP2C*, the H3K4me3 peak was present and the H3K27me3 peak covered the entire gene body, consistent with monoallelic expression. The histone modification profile of the upstream non-informative gene *MST4* is consistent with non-escaping status. In the control male sample, there is only one copy of X-linked genes, therefore the H3K4me3 marks were present and H3K27me3 were absent for all expressed genes in this region.

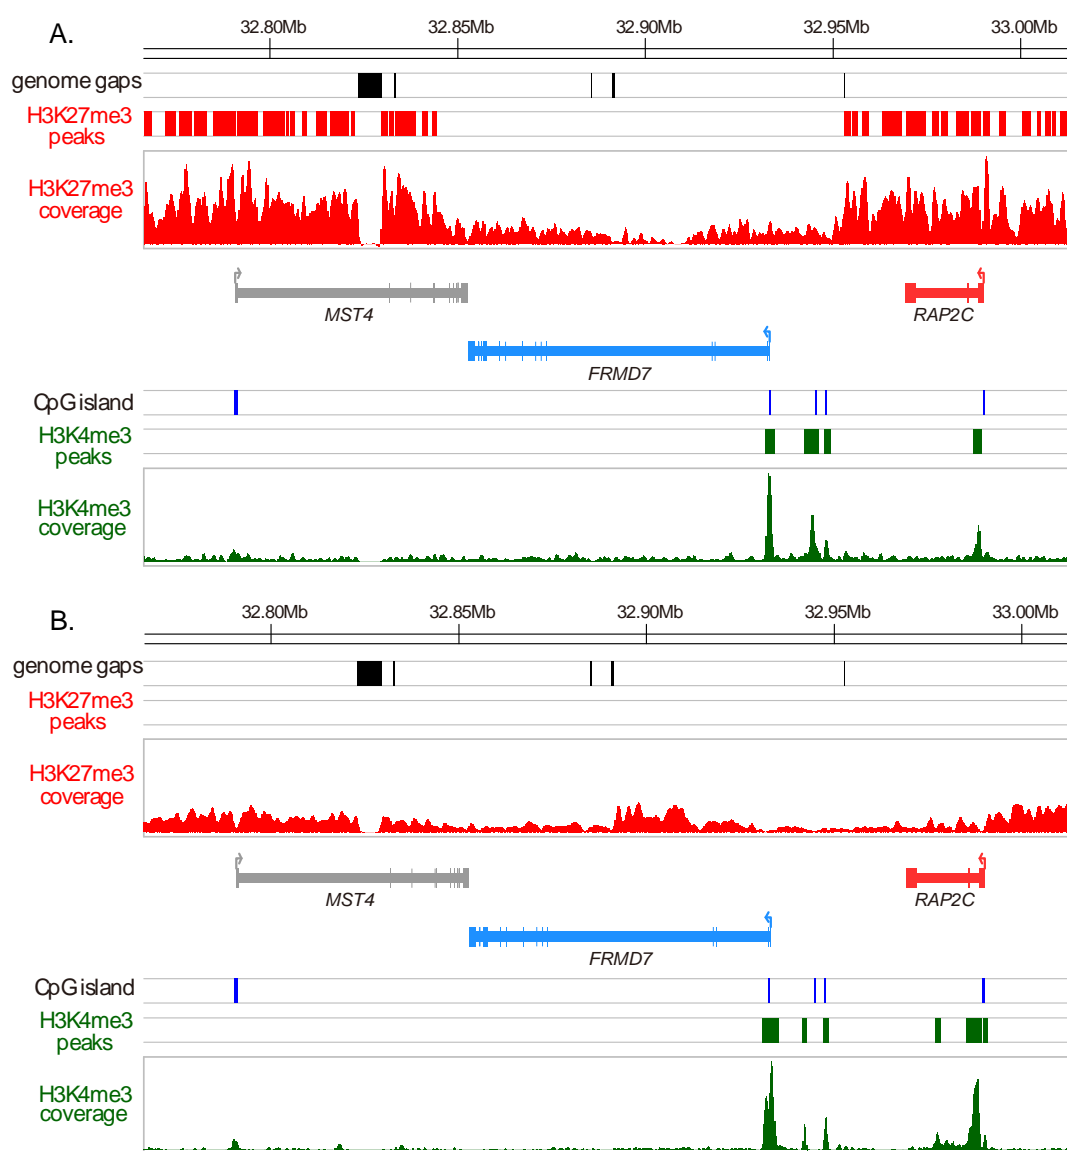

**Figure S38. Histone modification H3K4me3 and H3K27me3 peaks and coverage profile for X chromosome region containing escaper genes *PHF6*, *FAM122B* and *FAM122A* in female head and control male fibroblasts from ChIP-seq data.** (A). ChIP-seq results from female fetal head sample. (B) ChIP-seq results from control male fibroblasts. In each figure, plotted in the top panel are the genome gap locations and the H3K27me3 peaks and coverage. Gene models are shown in the middle panel, color-coded based on their imprinted XCI status (blue: escapers; red: non-escapers; gray: not known due to lack of informative SNPs). In the bottom panel are the CpG island locations and the H3K4me3 peaks and coverage profile. In females for the three escaper genes (*PHF6*, *FAM122B* and *FAM122A*), the H3K4me3 marks were present at promoter CpG islands, suggesting active transcription. The H3K27me3 marks were depleted across the gene body, consistent with biallelic expression. For the two nonescapers (*HPRT1* and *MOSPD1*), the H3K4me3 marks were present and the H3K27me3 peaks covered the entire gene body, consistent with monoallelic expression. In the control male sample, there is only one copy of X-linked genes, therefore the H3K4me3 marks were present and H3K27me3 were absent for all expressed genes in this region.

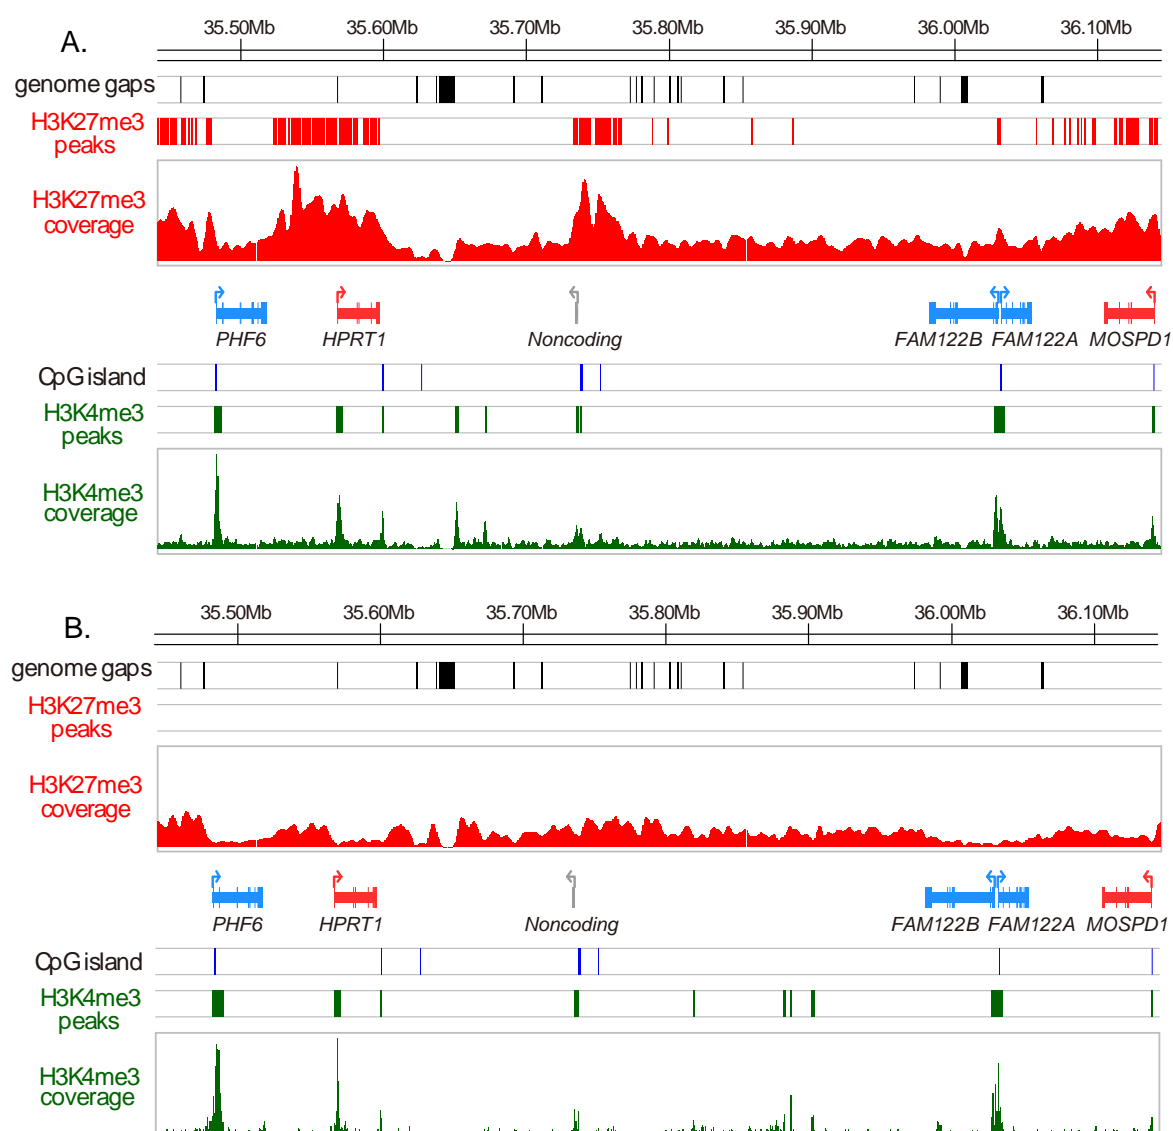

**Figure S39. Histone modification H3K4me3 and H3K27me3 peaks and coverage profile for X chromosome region containing escaper genes *MTMR1*, *CD99L2* and *HMGB3* in female head and control male fibroblasts from ChIP-seq data.** (A). ChIP-seq results from female fetal head sample. (B) ChIP-seq results from control male fibroblasts. In each figure, plotted in the top panel are the genome gap locations and the H3K27me3 peaks and coverage. Gene models are shown in the middle panel, color-coded based on their imprinted XCI status (blue: escapers; red: non-escapers; gray: not known due to lack of informative SNPs). In the bottom panel are the CpG island locations and the H3K4me3 peaks and coverage profile. In females for the three escaper genes (*MTMR1*, *CD99L2* and *HMGB3*), the H3K4me3 marks were present at promoter CpG islands, suggesting active transcription. The H3K27me3 marks were depleted across the gene body, consistent with biallelic expression. For the two nonescapers (*MTM1* and *GPR50*), the H3K27me3 peaks covered the entire gene body, consistent with monoallelic expression. In the control male sample, there is only one copy of X-linked genes, therefore the H3K4me3 marks were present and H3K27me3 were absent for all expressed genes in this region.

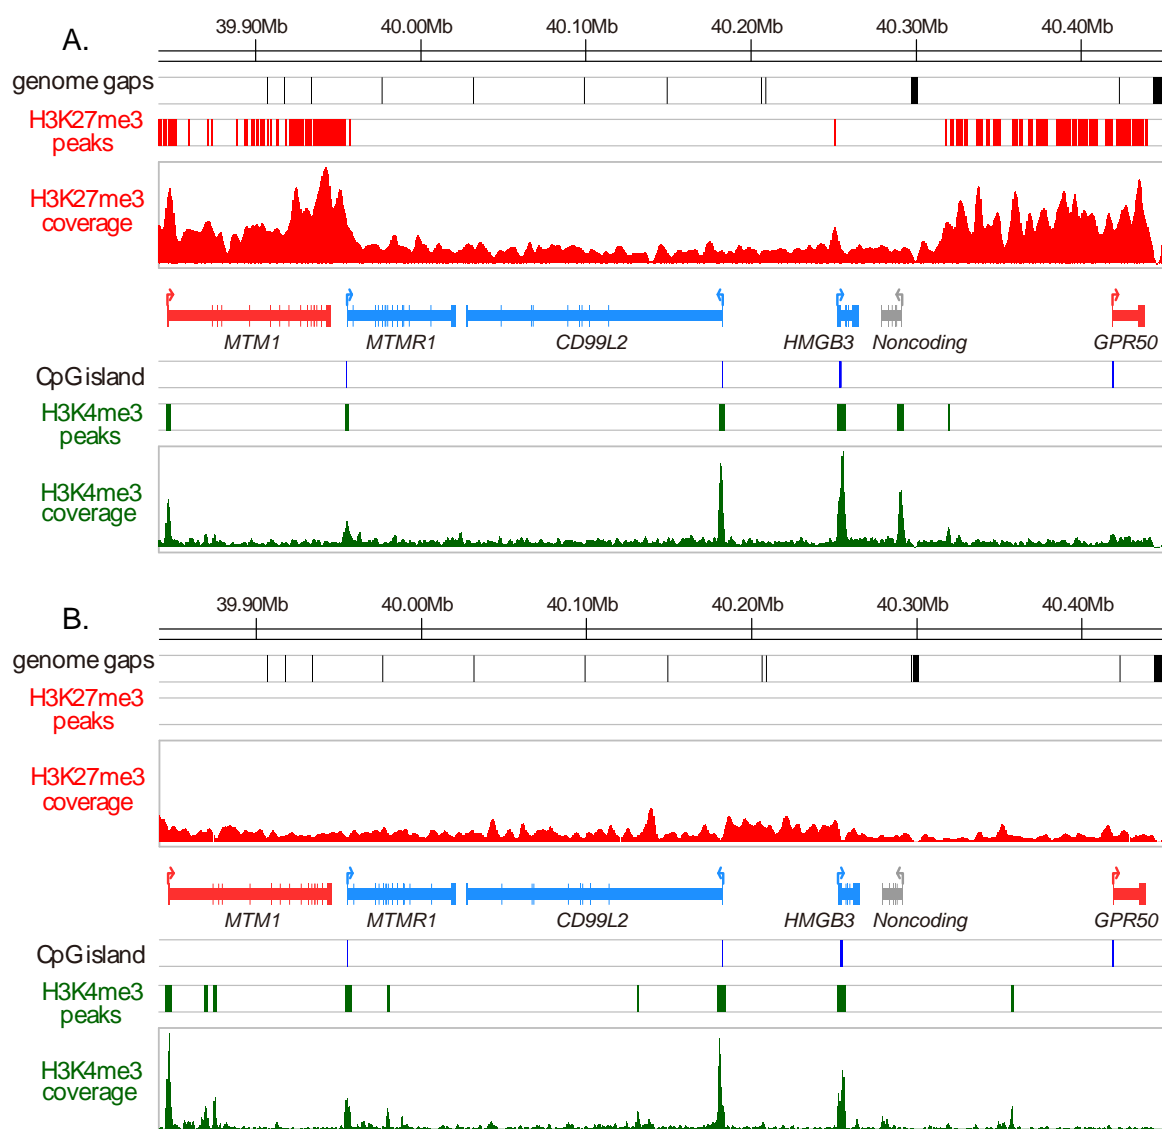

**Figure S40. Histone modification H3K4me3 and H3K27me3 peaks and coverage profile for X chromosome region containing escaper gene *RBMX* in female head and control male fibroblasts from ChIP-seq data.** (A). ChIP-seq results from female fetal head sample. (B) ChIP-seq results from control male fibroblasts. In each figure, plotted in the top panel are the genome gap locations and the H3K27me3 peaks and coverage. Gene models are shown in the middle panel, color-coded based on their imprinted XCI status (blue: escapers; red: non-escapers; gray: not known due to lack of informative SNPs). In the bottom panel are the CpG island locations and the H3K4me3 peaks and coverage profile. In females for the escaper gene *RBMX*, the H3K4me3 mark was present at the promoter CpG island, suggesting active transcription. The H3K27me3 marks were depleted across the gene body, consistent with biallelic expression. For the two nonescapers (*ARHGEF6* and *TM9SF2*), the H3K4me3 marks were present and the H3K27me3 peaks covered the entire gene body, consistent with monoallelic expression. In the control male sample, there is only one copy of X-linked genes, therefore the H3K4me3 mark was present and H3K27me3 marks were absent for all expressed genes in this region.

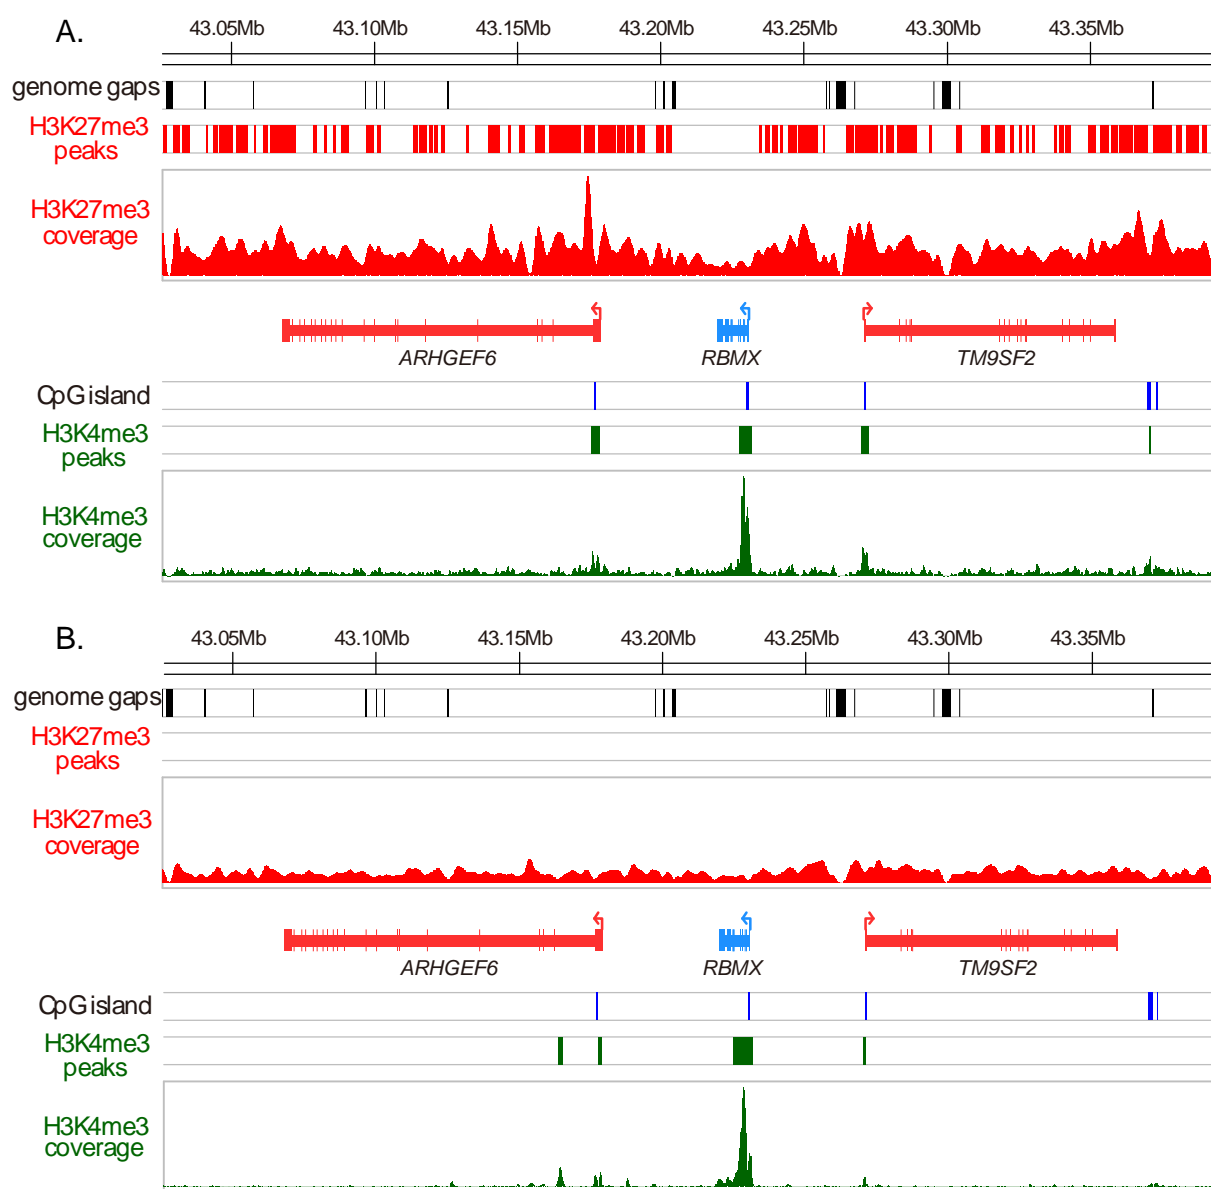

**Figure S41. Histone modification H3K4me3 and H3K27me3 peaks and coverage profile for X chromosome region containing escaper gene *ATRX* in female head and control male fibroblasts from ChIP-seq data.** (A). ChIP-seq results from female fetal head sample. (B) ChIP-seq results from control male fibroblasts. In each figure, plotted in the top panel are the genome gap locations and the H3K27me3 peaks and coverage. Gene models are shown in the middle panel, color-coded based on their imprinted XCI status (blue: escapers; red: non-escapers; gray: not known due to lack of informative SNPs). In the bottom panel are the CpG island locations and the H3K4me3 peaks and coverage profile. In females for the escaper gene *ATRX*, the H3K4me3 mark was present at the promoter CpG island, suggesting active transcription. The H3K27me3 marks were depleted across the gene body, consistent with biallelic expression. For the two nonescapers (*MAGT1* and *COX7B*), the H3K4me3 marks were present and the H3K27me3 peaks covered the entire gene body, consistent with monoallelic expression. The non-informative upstream gene *FGF16* was covered with H3K27me3 peaks across the entire gene body, consistent with nonescaper status. In the control male sample, there is only one copy of X-linked genes, therefore the H3K4me3 mark was present and H3K27me3 marks were absent for all expressed genes in this region.

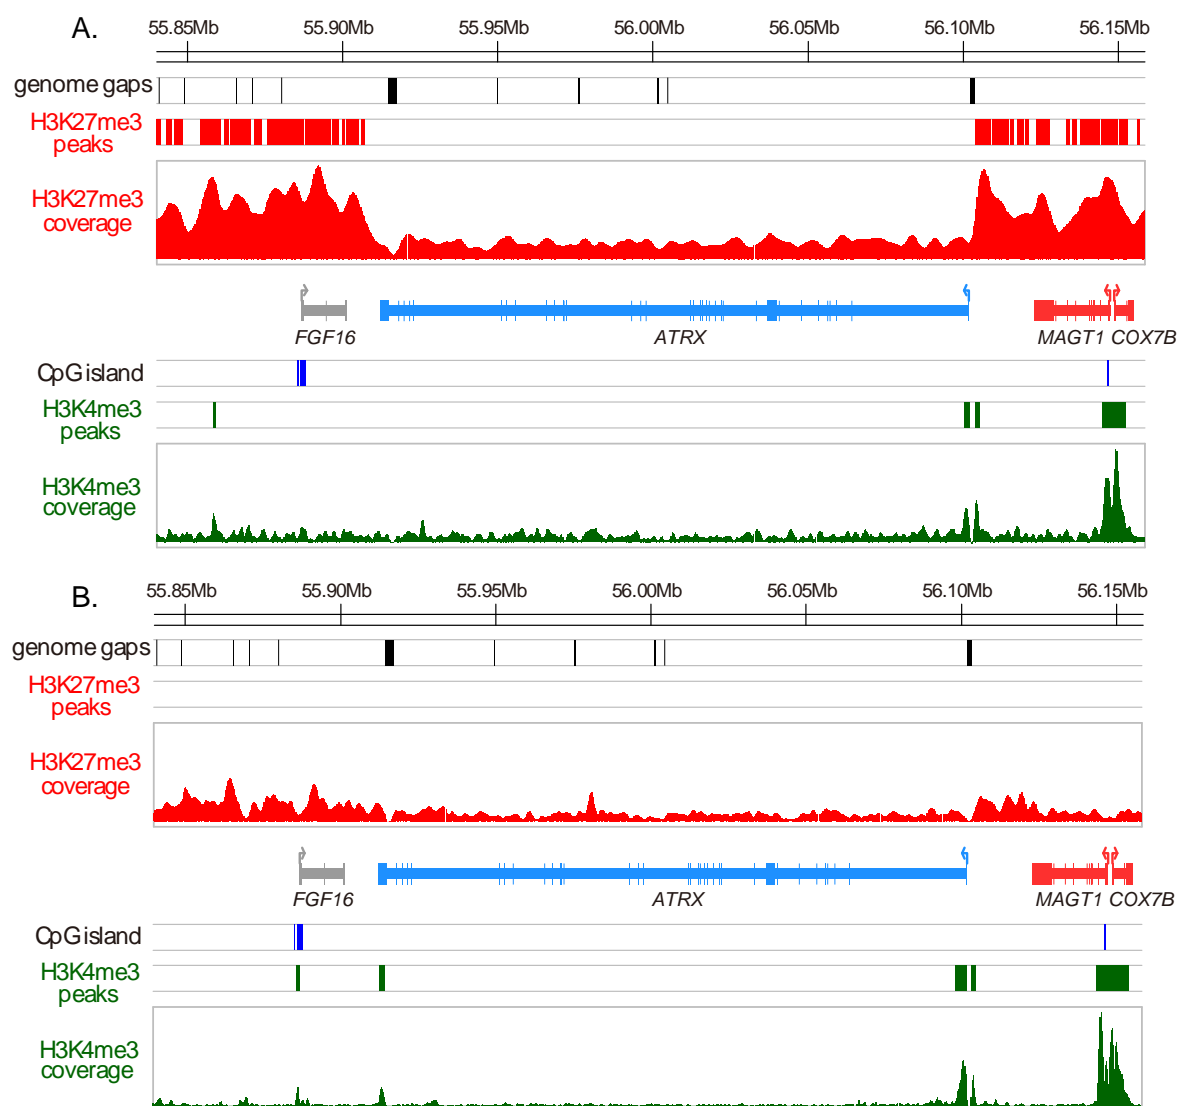

**Figure S42. Histone modification H3K4me3 and H3K27me3 peaks and coverage profile for X chromosome region containing escaper genes *TAF1* and *NONO* in female head and control male fibroblasts from ChIP-seq data.** (A). ChIP-seq results from female fetal head sample. (B) ChIP-seq results from control male fibroblasts. In each figure, plotted in the top panel are the genome gap locations and the H3K27me3 peaks and coverage. Gene models are shown in the middle panel, color-coded based on their imprinted XCI status (blue: escapers; red: non-escapers; gray: not known due to lack of informative SNPs). In the bottom panel are the CpG island locations and the H3K4me3 peaks and coverage profile. In females for the two escaper genes (*TAF1* and *NONO*), the H3K4me3 marks were present at promoter CpG islands, suggesting active transcription. The H3K27me3 marks were depleted across the gene body, consistent with biallelic expression. For the three nonescapers (*APEX2*, *ZMYM3* and *NLGN3*), the H3K27me3 peaks covered the entire gene body, consistent with monoallelic expression. Three non-informative genes (*OGT*, *RHOG* and *ITGB1BP2*) in the H3K27me3 depleted region are consistent with escaper status. In the control male sample, there is only one copy of X-linked genes, therefore the H3K4me3 marks were present and H3K27me3 were absent for all expressed genes in this region.

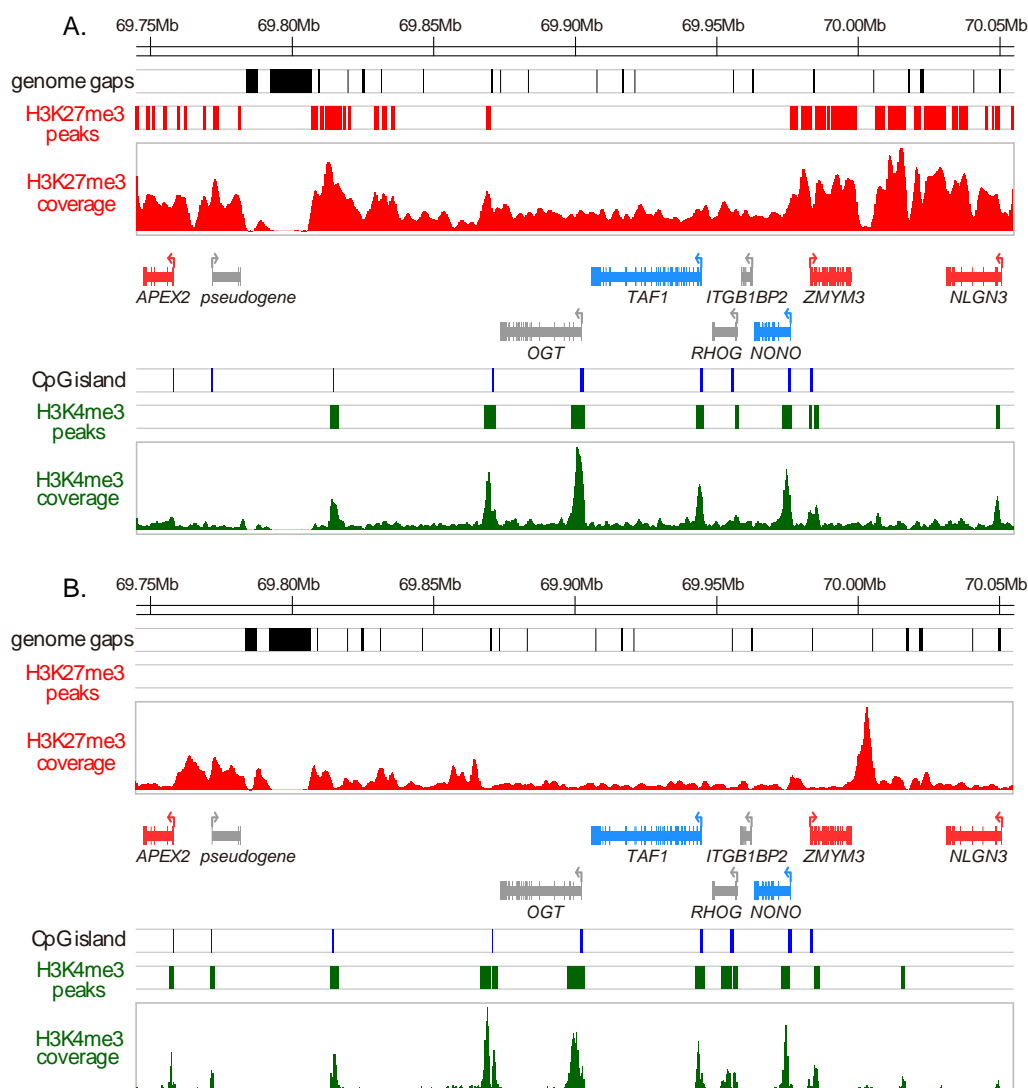

**Figure S43. Histone modification H3K4me3 and H3K27me3 peaks and coverage profile for X chromosome region containing escaper gene *CENPI* and candidate escaper gene *CSTF2* in female head and control male fibroblasts from ChIP-seq data.** (A). ChIP-seq results from female fetal head sample. (B) ChIP-seq results from control male fibroblasts. In each figure, plotted in the top panel are the genome gap locations and the H3K27me3 peaks and coverage. Gene models are shown in the middle panel, color-coded based on their imprinted XCI status (blue: escapers; red: non-escapers; gray: not known due to lack of informative SNPs). In the bottom panel are the CpG island locations and the H3K4me3 peaks and coverage profile. In females for the escaper gene *CENPI*, the H3K4me3 mark was present at promoter CpG islands, suggesting active transcription. The H3K27me3 marks were depleted across the gene body, consistent with biallelic expression. For the nonescaper *SYTL4*, the H3K27me3 peaks covered the entire gene body, consistent with monoallelic expression. The downstream gene *CSTF2* does not have informative SNPs, but its histone modification profile suggests it is a candidate escaper. The other two non-informative genes (*TMEM35* and *XKRX*) were covered with H3K27me3 peaks across the entire gene body, consistent with nonescaper status. In the control male sample, there is only one copy of X-linked genes, therefore the H3K4me3 marks were present and H3K27me3 were absent for all expressed genes in this region.

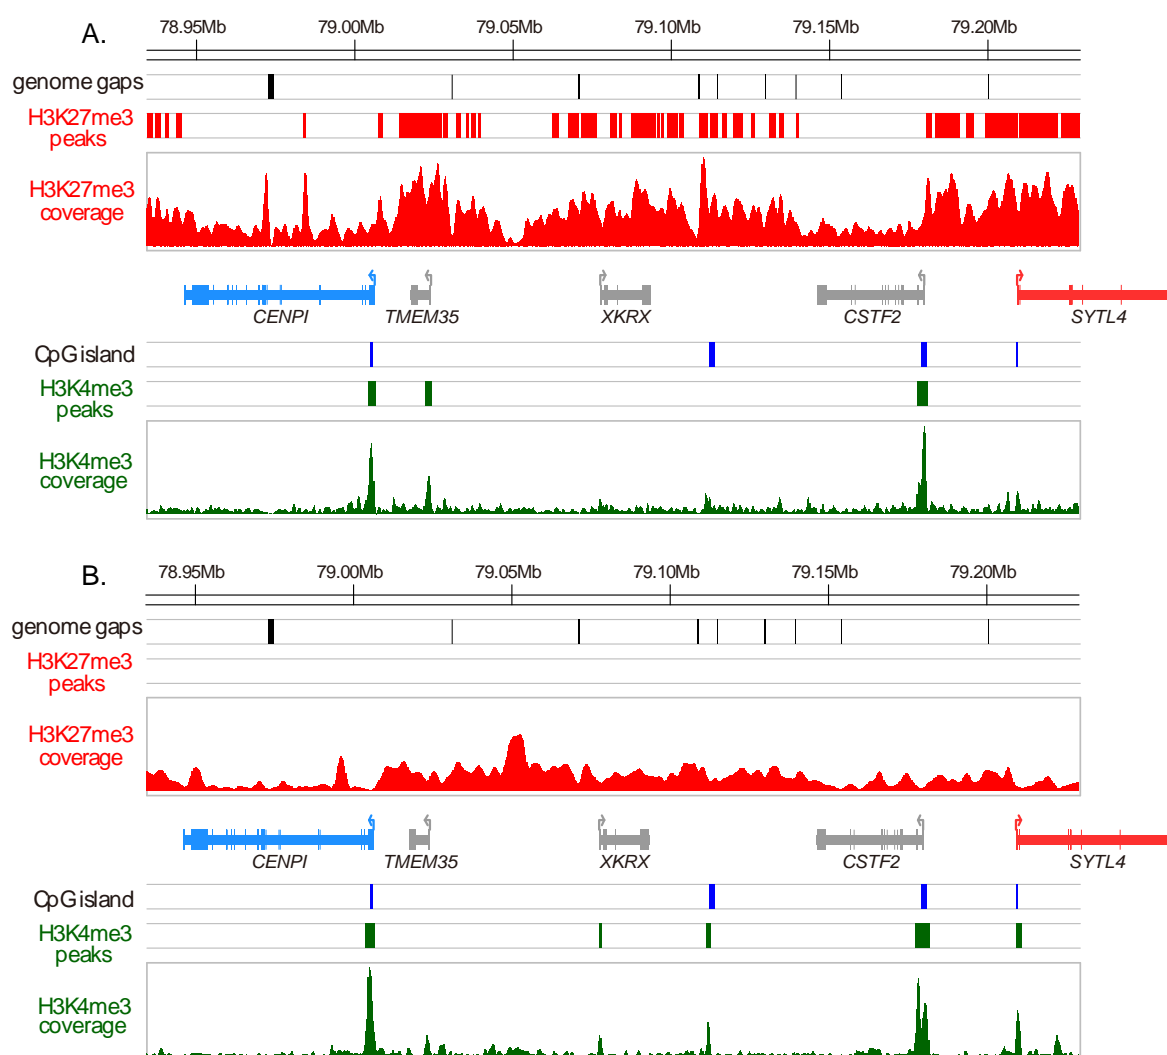

**Figure S44. Histone modification H3K4me3 and H3K27me3 peaks and coverage profile for X chromosome region containing candidate escaper gene *ZFP347L* in female head and control male fibroblasts from ChIP-seq data.** (A). ChIP-seq results from female fetal head sample. (B) ChIP-seq results from control male fibroblasts. In each figure, plotted in the top panel are the genome gap locations and the H3K27me3 peaks and coverage. Gene models are shown in the middle panel, color-coded based on their imprinted XCI status (blue: escapers; red: non-escapers; gray: not known due to lack of informative SNPs). In the bottom panel are the CpG island locations and the H3K4me3 peaks and coverage profile. In females for the non-informative candidate escaper gene *ZFP347L*, the H3K4me3 mark was present at the promoter CpG island, indicating active transcription. The H3K27me3 marks were depleted across the gene body, suggesting biallelic expression. For the nonescaper gene *CENPBD1*, the H3K4me3 peak was present and the H3K27me3 peaks covered the entire gene body, consistent with monoallelic expression. In the control male sample, there is only one copy of X-linked genes, therefore the H3K4me3 mark was present and H3K27me3 marks were absent for all expressed genes in this region.

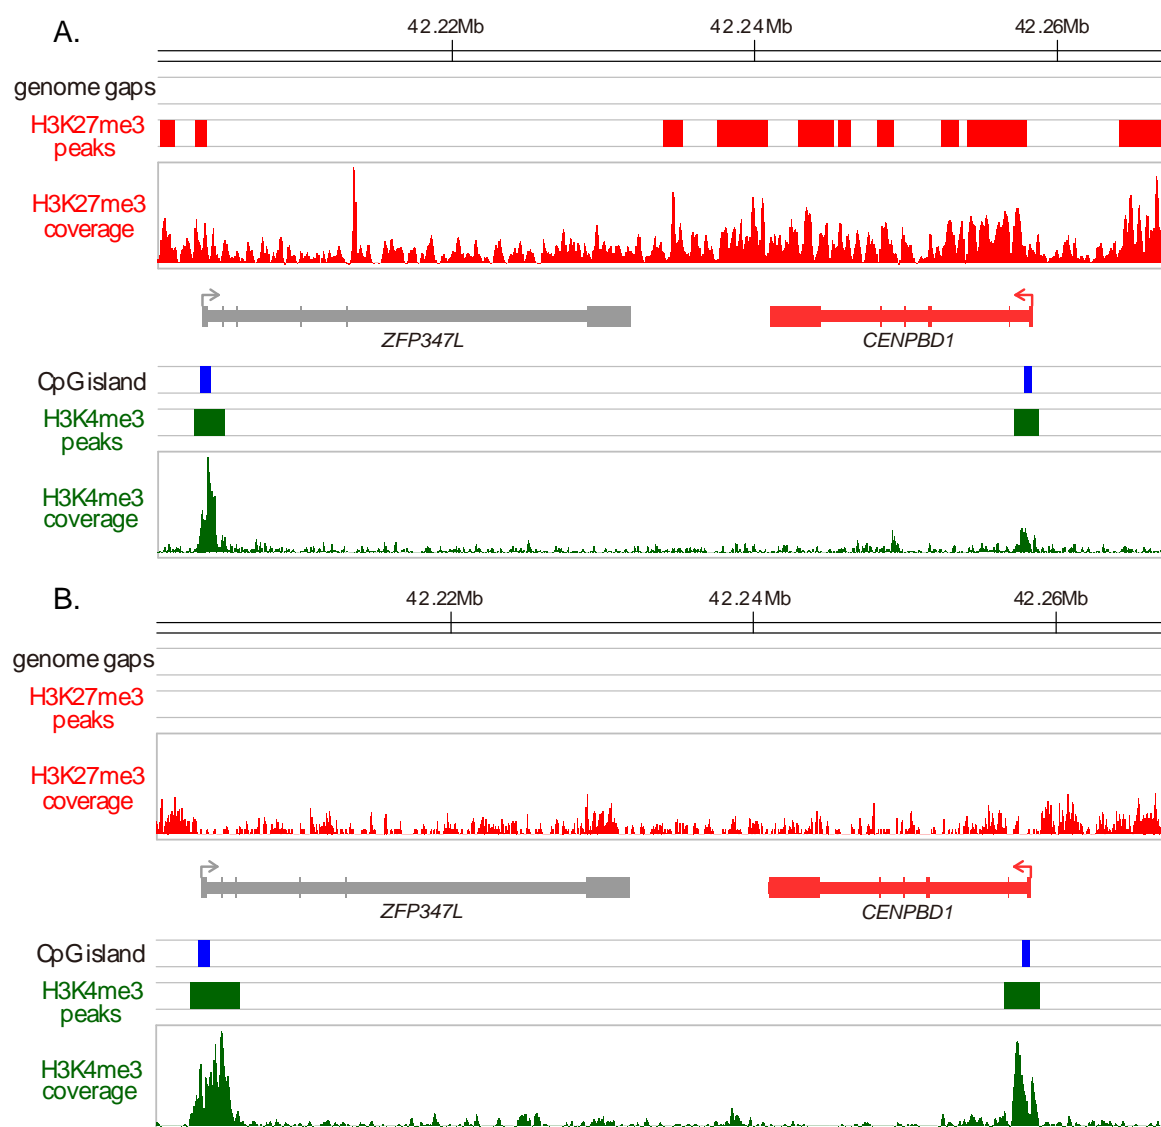



**Figure S45. Histone modification H3K4me3 and H3K27me3 peaks and coverage profile for X chromosome region containing candidate escaper gene *CCDC22* and *KDM5C* in female head and control male fibroblasts from ChIP-seq data.** (A). ChIP-seq results from female fetal head sample. (B) ChIP-seq results from control male fibroblasts. In each figure, plotted in the top panel are the genome gap locations and the H3K27me3 peaks and coverage. Gene models are shown in the middle panel, color-coded based on their imprinted XCI status (blue: escapers; red: non-escapers; gray: not known due to lack of informative SNPs). In the bottom panel are the CpG island locations and the H3K4me3 peaks and coverage profile. There are four non-informative genes in this region. *PPP1R3F* was expressed at low level. In females for *CCDC22* and *KDM5C*, the H3K4me3 mark was present at the promoter CpG islands and H3K27me3 marks were depleted across the gene body, suggesting escaper status. *GPR173* was partly covered with H3K27me3 peak, which is a potential non-escaper. In the control male sample, there is only one copy of X-linked genes, therefore the H3K4me3 mark was present and H3K27me3 marks were absent for all expressed genes in this region.

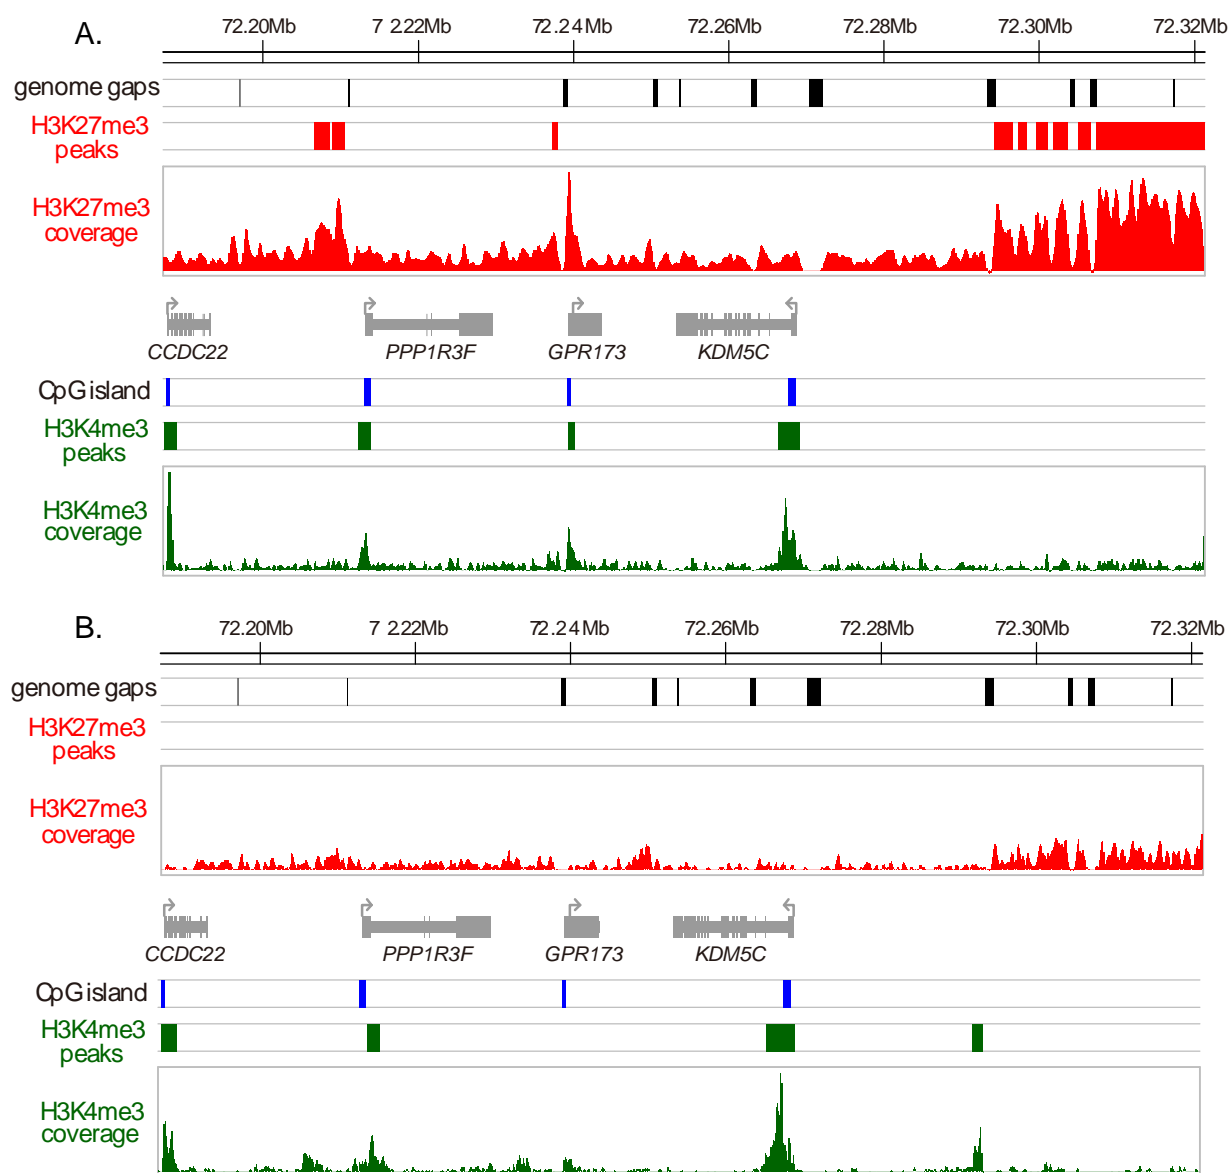

**Figure S46. Allele-specific histone modification H3K4me3 for escaper gene *YIPF6* in female head ChIP-seq data from LL1 x LL2 cross.** (A). The 5'-end gene model, CpG island location and the H3K4me3 peak/coverage profile for an escaper gene *YIPF6*. There is one SNP (chrX\_7594487) under the H3K4me3 peak with enough coverage to infer allele-specific histone modification. (B). Sanger sequencing genotyping results in the two embryos (579E10 and 579E11, used for ChIP-seq experiments) and their parents confirmed that the SNP (chrX\_7594487) is informative in both embryos. (C). From the ChIP-seq data, we observed 64% of the H3K4me3 reads from the maternal allele and 36% from the paternal allele at chrX\_7594487, suggesting both parental alleles are active. This is consistent with allele-specific expression profile at SNP OMSNP0155108 in the RNA-seq data and SNP OMSNP0155110 from the allele-specific pyrosequencing results.

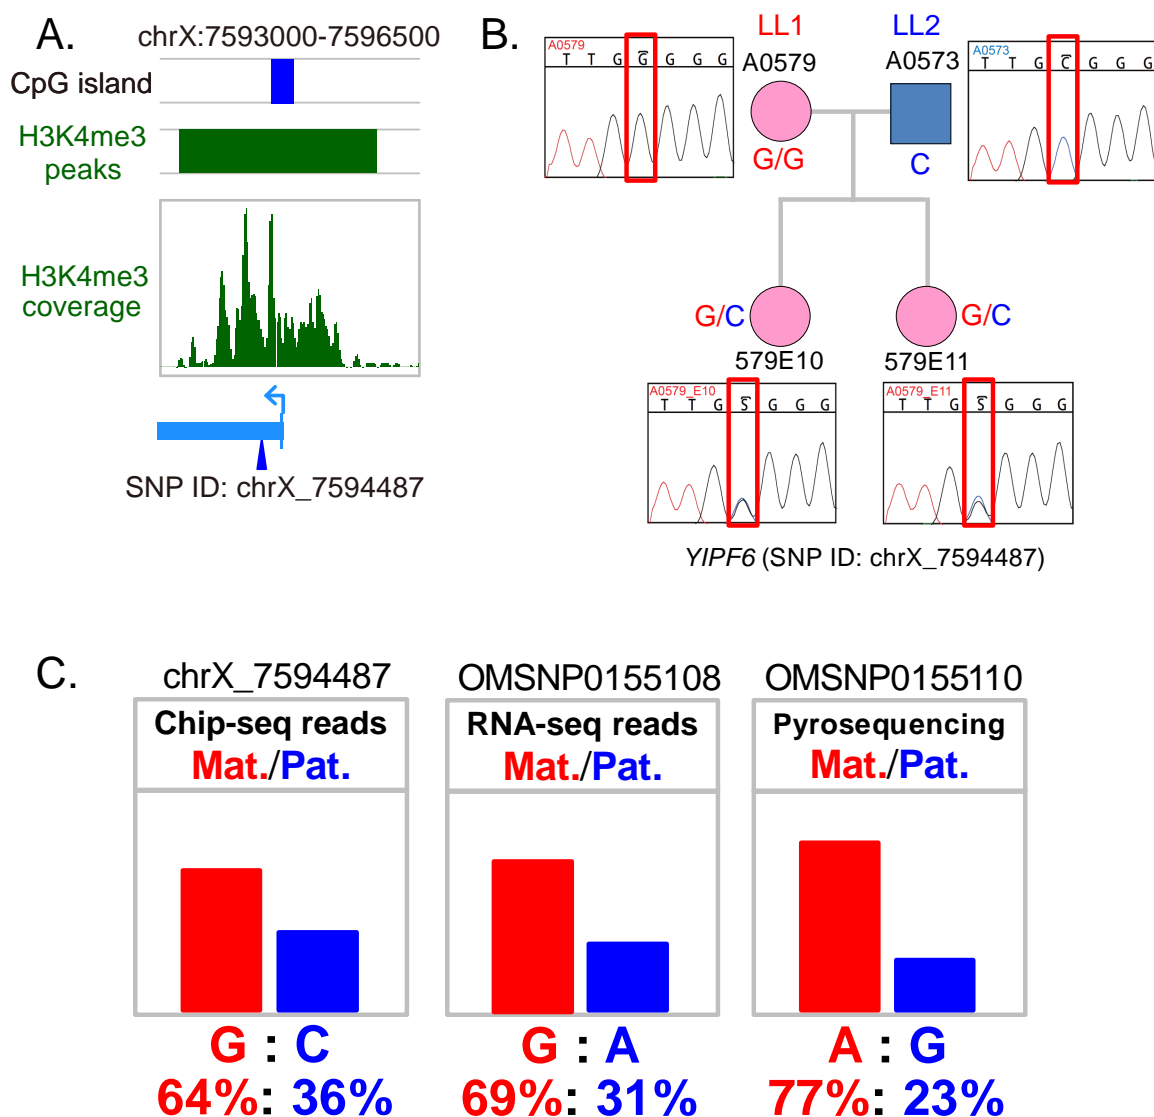

**Figure S47. Allele-specific histone modification H3K4me3 for escaper gene *FAM122B* in female head ChIP-seq data from LL1 x LL2 cross.** (A). The 5'-end gene model, CpG island location and the H3K4me3 peak/coverage profile for an escaper gene *FAM122B*. There is one SNP (OMSNP0156061) under the H3K4me3 peak with enough coverage to infer allele-specific histone modification. (B). Sanger sequencing genotyping results in the two embryos (579E10 and 579E11, used for ChIP-seq experiments) and their mother confirmed that the SNP (OMSNP0156061) is informative in both embryos. (C). From the ChIP-seq data, we observed the H3K4me3 reads from both parental alleles at OMSN0156061, suggesting both parental alleles are active. This is consistent with biallelic expression from the allele-specific pyrosequencing results.

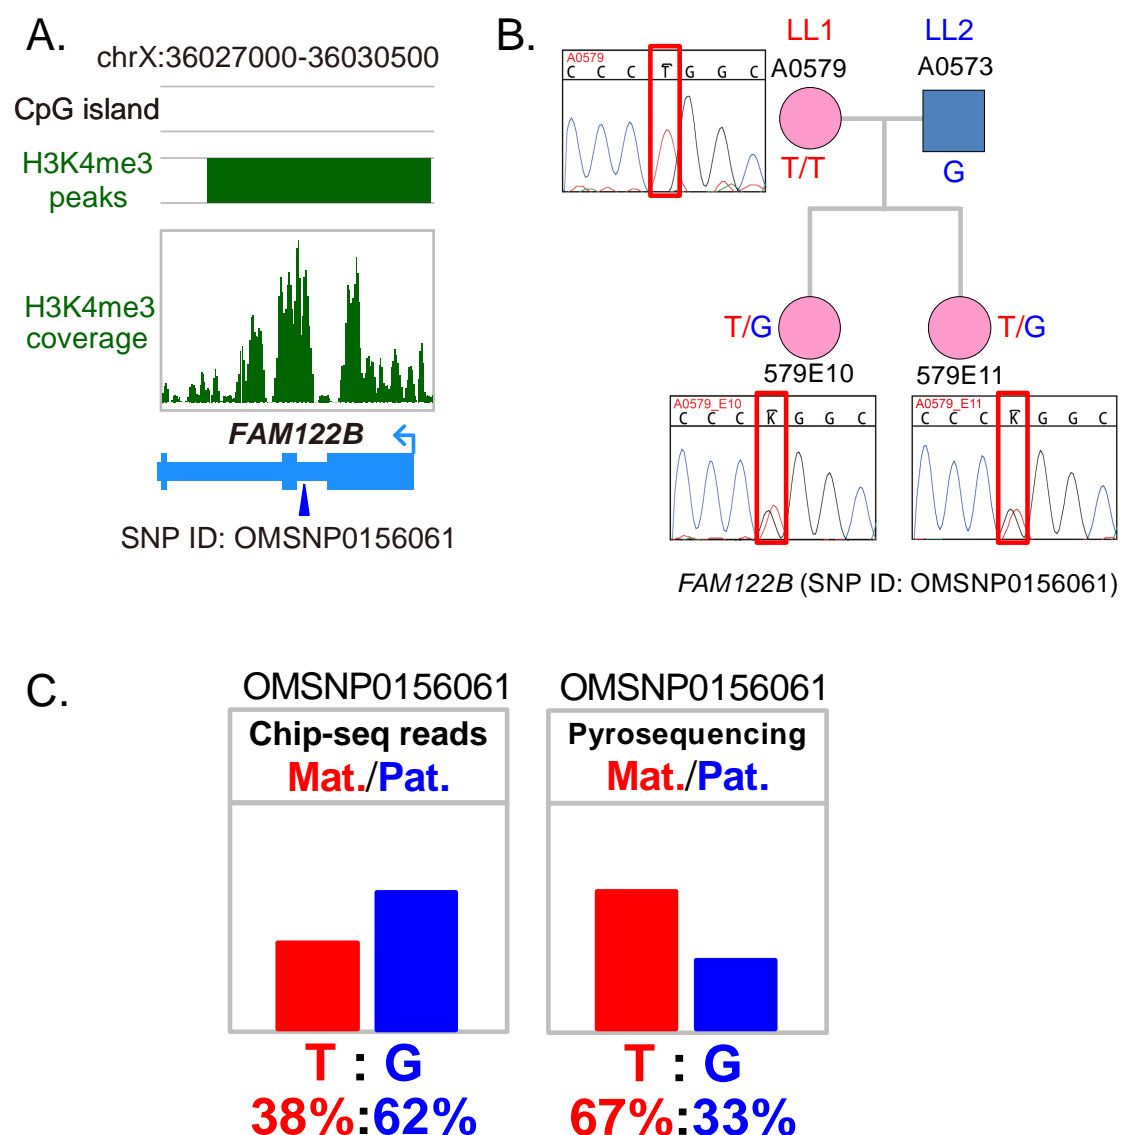

**Figure S48. Allele-specific histone modification H3K4me3 for nonescaper gene *PNCK* in female head ChIP-seq data from LL1 x LL2 cross.** (A). The 5'-end gene model, CpG island location and the H3K4me3 peak/coverage profile for a nonescaper gene *PNCK*. There is one SNP (OMSNP0155237) under the H3K4me3 peak with enough coverage to infer allele-specific histone modification. (B). Sanger sequencing genotyping results in the two embryos (579E10 and 579E11, used for ChIP-seq experiments) and their parents confirmed that the SNP (OMSNP0155237) is informative in both embryos. (C). From the ChIP-seq data, we observed 100% of the H3K4me3 reads from the maternal allele at OMSN0155237, suggesting the on-mark is only present at the maternal allele. This is consistent with maternal-specific expression at OMSN0155237 and OMSN0155219 in the RNA-seq data.

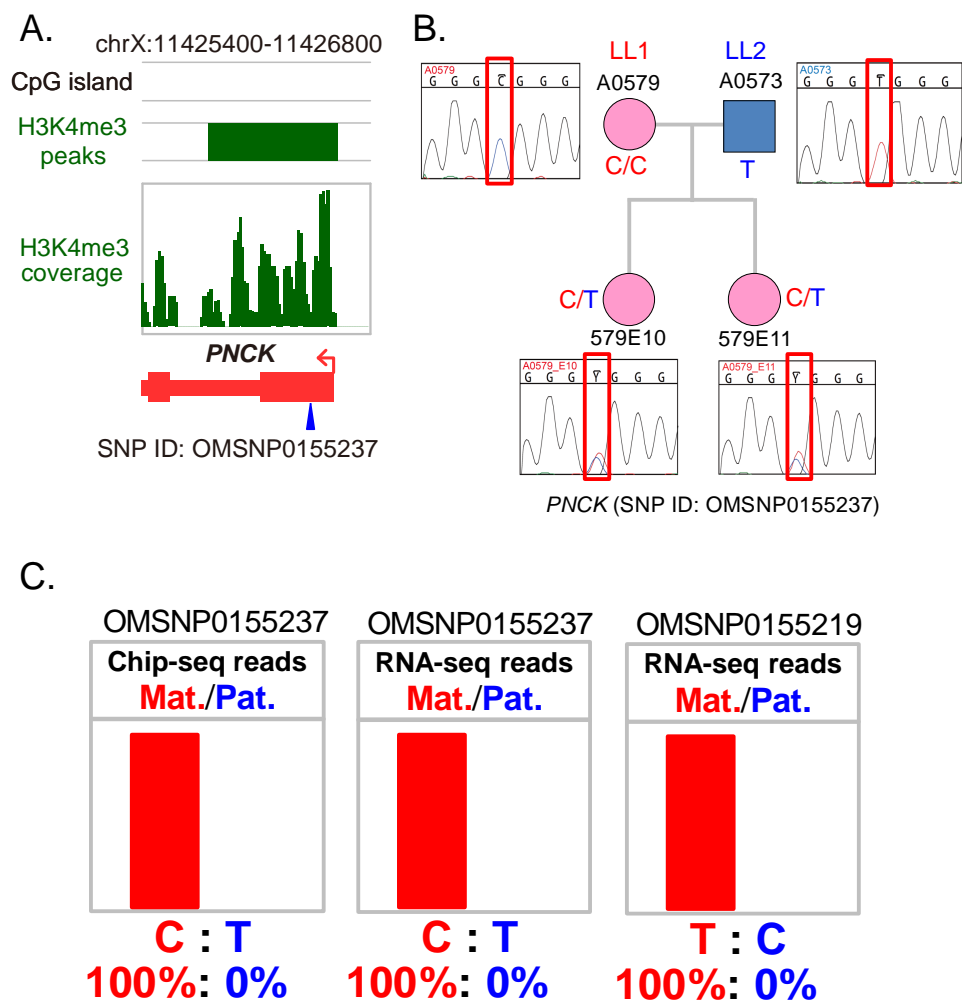

**Figure S49. Allele-specific histone modification H3K4me3 for nonescaper gene *GPC4* in female head ChIP-seq data from LL1 x LL2 cross.** (A). The 5'-end gene model, CpG island location and the H3K4me3 peak/coverage profile for a nonescaper gene *GPC4*. There is one SNP (OMSNP0156005) under the H3K4me3 peak with enough coverage to infer allele-specific histone modification. (B). Sanger sequencing genotyping results in the two embryos (579E10 and 579E11, used for ChIP-seq experiments) and their parents confirmed that the SNP (OMSNP0156005) is informative in both embryos. (C). From the ChIP-seq data, we observed 100% of the H3K4me3 reads from the maternal allele at OMSN0156005, suggesting the on-mark is only present at the maternal allele. This is consistent with maternal-specific expression at OMSN0156005 and OMSN0156006 in the RNA-seq data.

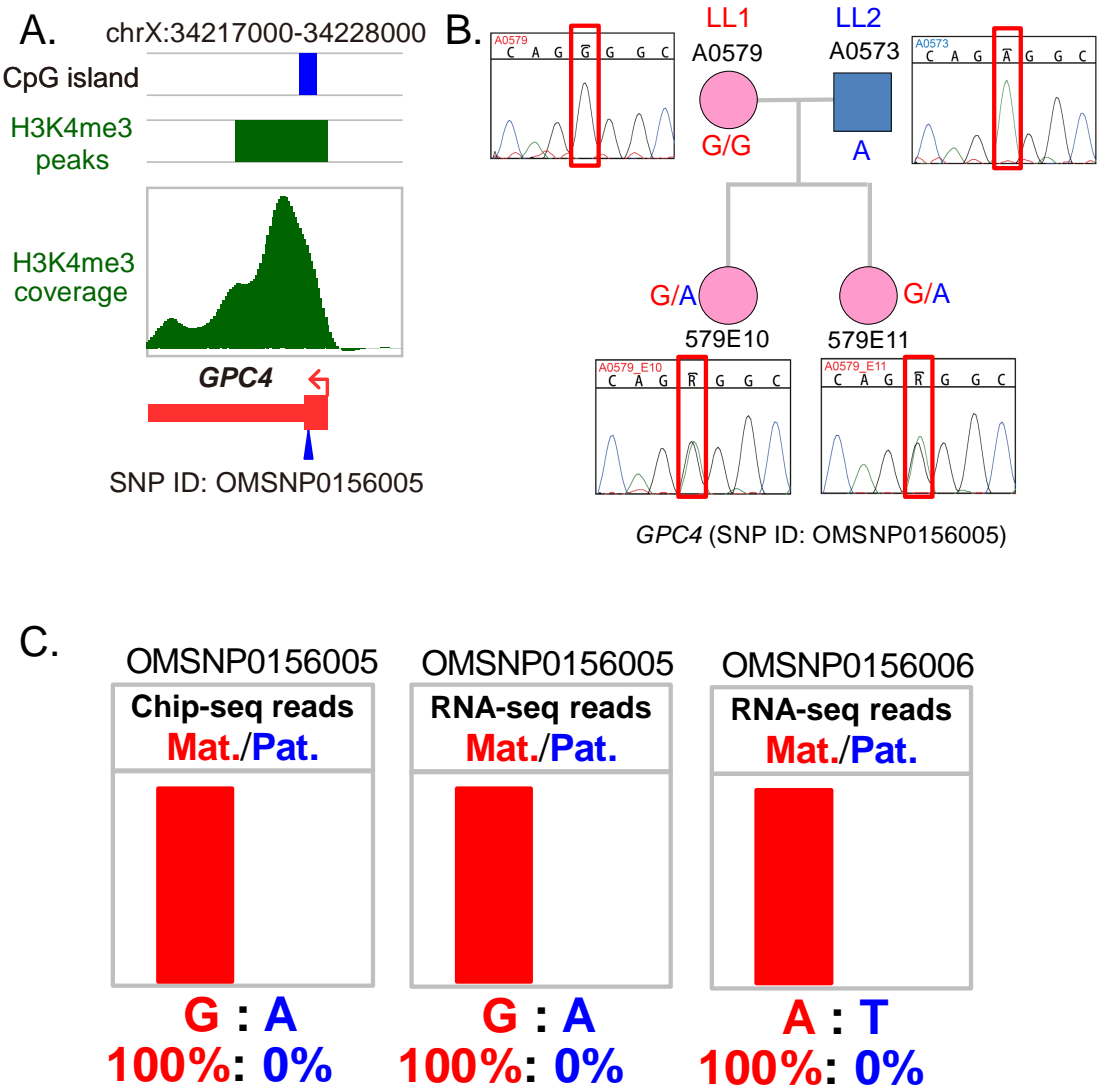

**Figure S50. Allele-specific histone modification H3K4me3 for nonescaper gene *ITM2A* in female head ChIP-seq data from LL1 x LL2 cross.** (A). The 5'-end gene model, CpG island location and the H3K4me3 peak/coverage profile for a nonescaper gene *ITM2A*. There is one SNP (OMSNP0156531) under the H3K4me3 peak with enough coverage to infer allele-specific histone modification. (B). Sanger sequencing genotyping results in the two embryos (579E10 and 579E11, used for ChIP-seq experiments) and their parents confirmed that the SNP (OMSNP0156531) is informative in both embryos. (C). From the ChIP-seq data, we observed 100% of the H3K4me3 reads from the maternal allele at OMSN0156531, suggesting the on-mark is only present at the maternal allele. This is consistent with maternal-specific expression at OMSN0156531 in the RNA-seq data.

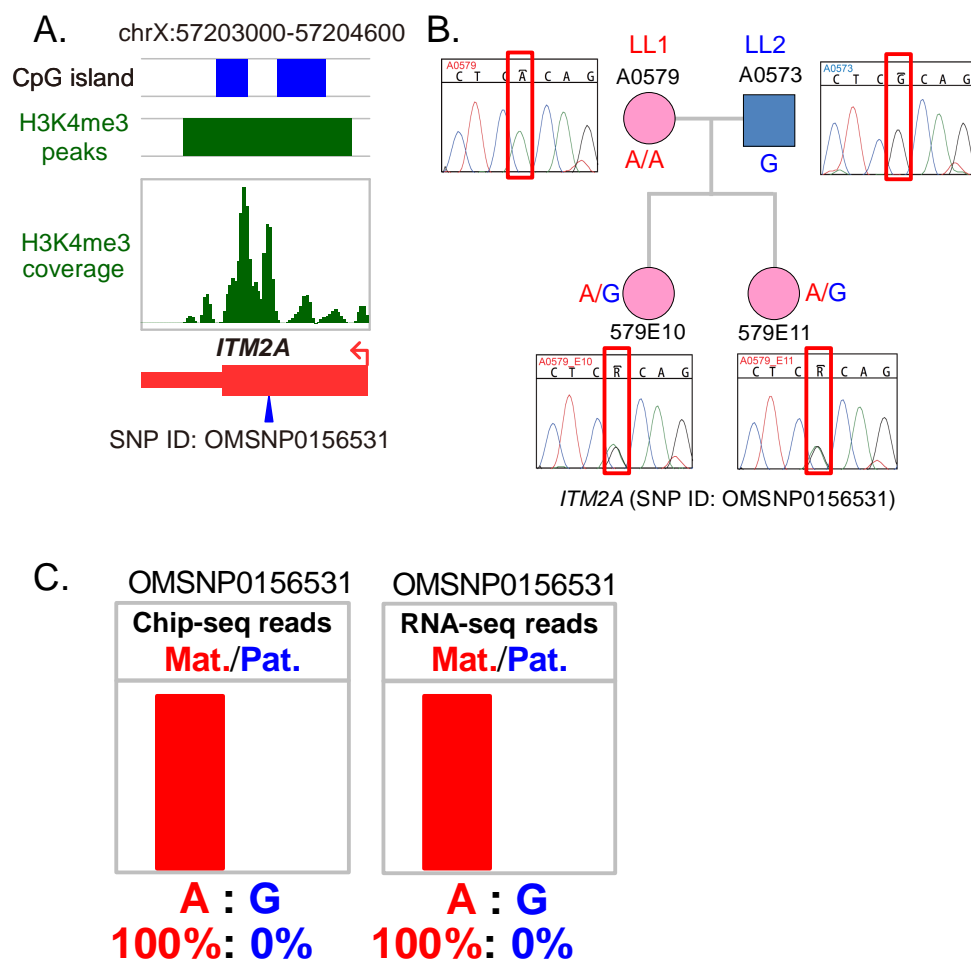

**Figure S51. Allele-specific histone modification H3K4me3 for nonescaper gene *PDZD11* in female head ChIP-seq data from LL1 x LL2 cross.** (A). The 5'-end gene model, CpG island location and the H3K4me3 peak/coverage profile for two X-linked genes, *PDZD11* (+ strand) and *KIF4A* (- strand). They are organized in head-to-tail orientation, and they share one CpG island and one H3K4me3 peak. *PDZD11* is a nonescaper gene (colored in red) and the escaping status for *KIF4A* (colored in gray) is unknown due to lack of informative exonic SNPs. There is one SNP (OMSNP0223343) under the H3K4me3 peak with enough coverage to infer allele-specific histone modification. (B). Sanger sequencing genotyping results in the two embryos (579E10 and 579E11, used for ChIP-seq experiments) and their parents confirmed that the SNP (OMSNP0223343) is informative in both embryos. (C). From the ChIP-seq data, we observed 100% of the H3K4me3 reads from the maternal allele at OMSN0223343, suggesting the on-mark is only present at the maternal allele. This is consistent with maternal-specific expression of *PDZD11* at OMSN0223343 and OMSN0156925 in the RNA-seq data.

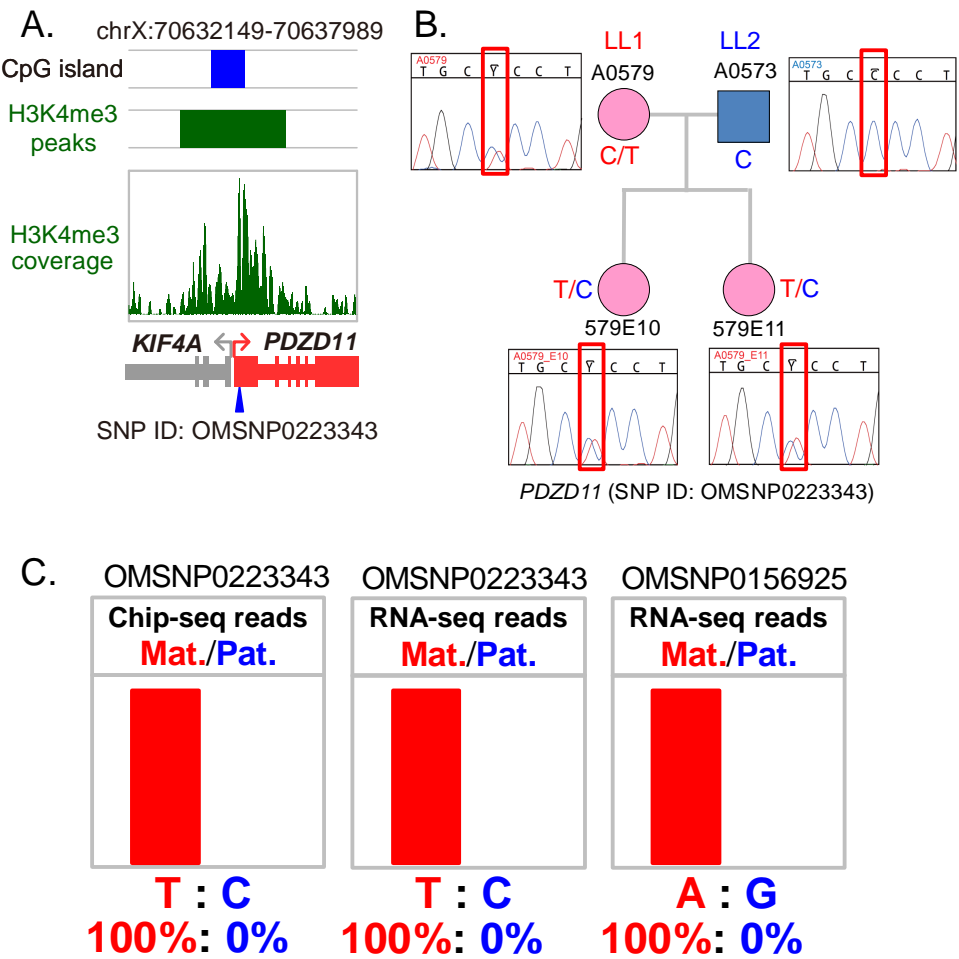

Supplement: Supplemental_Figures_S1-S51.pdf [file Supplemental_Figures_S1-S51.pdf]
